# Supplementary material for: Heavier congeners of CO and CO2 as ligands: from zero-valent germanium (‘germylone’) to isolable monomeric GeX and GeX2 complexes (X = S, Se, Te)
Source: Royal Society of Chemistry journal article supplement (doi:10.1039/c6sc01839d), 2016-01-01
Supplement: c6sc01839d1.pdf [file c6sc01839d1.pdf]

Electronic Supplementary Information (ESI) for Chemical Science.  
This journal is ©The Royal Society of Chemistry 2015

## Supporting Information

### Heavier congeners of CO and CO<sub>2</sub> as ligands: from zero-valent germanium ('germylone') to isolable monomeric GeX and GeX<sub>2</sub> complexes (X = S, Se, Te)

Yun Xiong,<sup>a</sup> Shenglai Yao,<sup>a</sup> Miriam Karni,<sup>b</sup> Arseni Kostenko,<sup>b</sup> Alexander Burchert,<sup>a</sup> Yitzhak Apeloig,<sup>\*b</sup> Matthias Driess<sup>\*a</sup>

a. Department of Chemistry: Metalorganics and Inorganic Materials, Technische Universität Berlin, Strasse des 17. Juni 135, Sekr. C2, D-10623 Berlin (Germany). E-mail: matthias.driess@tu-berlin.de

b. Schulich Faculty of Chemistry and the Lise Meitner-Minerva Centre for Computational Quantum Chemistry, Technion-Israel Institute of Technology, Haifa 32000 (Israel). E-mail: apeloig@technion.ac.il

## Content

|          |                                                    |           |
|----------|----------------------------------------------------|-----------|
| <b>A</b> | <b><i>Synthesis and Characterisation</i></b> ..... | <b>2</b>  |
| <b>B</b> | <b><i>Crystallographic data</i></b> .....          | <b>13</b> |
| <b>C</b> | <b><i>Theoretical Calculation</i></b> .....        | <b>27</b> |
| <b>D</b> | <b><i>References</i></b> .....                     | <b>52</b> |

## ***A Synthesis and Characterisation***

### ***General Considerations***

All experiments were carried out under dry oxygen-free nitrogen using standard Schlenk techniques. Solvents were dried by standard methods and freshly distilled prior to use. The NMR spectra were recorded with Bruker spectrometers ARX200 and AV400 referenced to residual solvent signals as internal standards ( $^1\text{H}$ ,  $^{13}\text{C}\{\text{H}\}$ ). Abbreviations: *s* = singlet; *d* = doublet; *t* = triplet; *sept* = septet; *m* = multiplet; *br* = broad. Solid state CP/MAS  $^{77}\text{Se}$  and  $^{125}\text{Te}$  NMR spectra were recorded with a Bruker AVANCE II 400 spectrometer and 4mm double resonance MAS (Magic angle spinning) probes. Elemental analyses and ESI-MS were performed by the analytical labor in the Institute of Chemistry, Technical University of Berlin, Germany. The precursors **A** is synthesized according to literature.<sup>1</sup>

### ***Single-Crystal X-ray Structure Determination***

Crystals were each mounted on a glass capillary in per-fluorinated oil and measured in a cold  $\text{N}_2$  flow. The data of **1 - 5** were collected on an Oxford Diffraction Supernova, Single source at offset, Atlas at 150 K (Cu-  $\text{K}\alpha$ -radiation,  $\lambda = 1.5418 \text{ \AA}$ ). The structures were solved by direct method and refined on  $F^2$  with the SHELX-97<sup>2</sup> software package. In the crystal of compound **1**, four lattice solvent  $\text{CH}_3\text{CN}$  molecules are observed; while in the crystals of **2** and **3** two lattice THF molecules are found. The crystal of compound **4** contains one  $\text{CH}_3\text{CN}$  molecule as lattice solvent. Compound **5** crystalizes with three lattice THF molecules in the asymmetric unit. One of the latter lattice THF molecule is disordered over two positions which have been refined with 88 restraints on displacement parameters. CCDC 1457869 (**1**), CCDC 1457873 (**2**), CCDC 1457870 (**3**), CCDC 1457872 (**4**), and CCDC 1457871 (**5**) contain the supplementary crystallographic data for this paper. These data can be obtained free of charge by contacting The Cambridge Crystallographic Data Centre, 12, Union Road, Cambridge CB2 1EZ, UK; fax: +44 1223 336033.

### ***Synthesis and Characterisation of 1***

To a suspension of bis-NHC stabilized germyliumylidene chloride **A** (6.60 g, 10.78 mmol) in THF (100 mL) was added a freshly prepared THF solution of  $\text{NaC}_{10}\text{H}_8$  (two equivalent in 50 ml THF) at  $-20 \text{ }^\circ\text{C}$  under stirring. The reaction flask was wrapped with aluminum foil to keep the reaction mixture away from light. The reaction mixture was stirred for 4h to yield **B**. After the reduction is finished,  $\text{GaCl}_3$  (1.90 g, 10.78 mmol) was added to the reaction solution containing **B**, and the cooling bath was taken away. The reaction mixture was stirred at room temperature for 2h, the volatiles were then removed under reduced pressure, and naphthalene was washed away with n-hexane ( $2 \times 50\text{ml}$ ). The product **1** was extracted with THF ( $3 \times 100 \text{ ml}$ ). After dried under vacuum, compound **1** was obtained as a colorless powder with a yield of 5.02 g (7.00 mmol, 65%). The single crystals suitable for X-ray analysis was obtained from its solution in  $\text{CH}_3\text{CN}$  at  $4 \text{ }^\circ\text{C}$ . M. p.  $255 \text{ }^\circ\text{C}$  (decomp.);  $^1\text{H}$  NMR (200.13 MHz,  $[\text{D}_3]$   $\text{CH}_3\text{CN}$ ,  $25^\circ\text{C}$ ):  $\delta = 1.15$  (*d*,  $^3J(\text{H,H}) = 7.0 \text{ Hz}$ , 12 H;  $-\text{CH}(\text{CH}_3)_3$ ), 1.18 (*d*,  $^3J(\text{H,H}) = 7.0 \text{ Hz}$ , 6 H;  $-\text{CH}(\text{CH}_3)_3$ ), 1.35 (*d*,  $^3J(\text{H,H}) = 7.0$

Hz, 6 H;  $-\text{CH}(\text{CH}_3)_3$ , 2.28 (sept.,  $^3J(\text{H,H}) = 7.0$  Hz, 2 H;  $-\text{CH}(\text{CH}_3)_3$ , 3.22 (sept.,  $^3J(\text{H,H}) = 7.0$  Hz, 2 H;  $-\text{CH}(\text{CH}_3)_3$ , 6.57, 6.74 (AB-spin system,  $^2J = 13.3$  Hz; 2 H;  $\text{CH}_2$ ), 7.42 (*d*,  $^3J(\text{H,H}) = 7.0$  Hz, 2 H; *Ph*), 7.48 (*d*,  $^3J(\text{H,H}) = 7.0$  Hz, 2 H; *Ph*), 7.60 – 7.64 (*dd*,  $^3J(\text{H,H}) = 7.7$  Hz, 7.8 Hz, 2 H; *Ph*), 7.55 (*d*,  $^3J(\text{H,H}) = 2.0$  Hz, 2 H;  $=\text{CH}$  (imid)), 7.91 (*d*,  $^3J(\text{H,H}) = 2.0$  Hz, 2 H;  $=\text{CH}$  (imid));  $^{13}\text{C}\{^1\text{H}\}$  NMR (100.61 MHz,  $[\text{D}_3]$   $\text{CH}_3\text{CN}$ , 25 °C):  $\delta = 23.30, 23.47, 24.02, 24.65$  ( $\text{CH}(\text{CH}_3)_3$ ), 27.62, 28.19 ( $\text{CH}(\text{CH}_3)_3$ ), 62.92 ( $\text{CH}_2$ ), 122.53 ( $=\text{CH}(\text{imid})$ ), 124.09 (*m-Ph*), 124.44 (*m-Ph*), 125.99 ( $=\text{CH}(\text{imid})$ ), 130.81 (*p-Ph*), 133.21(*Ph*), 145.11(*o-Ph*), 146.86 (*o-Ph*), 174.16 ppm (carbene-C); IR (CsI,  $\text{cm}^{-1}$ ): 2967(vs), 2869(s), 1560(w), 1469(vs), 1411(s), 1387(w), 1364(w), 1292(m), 1256(w), 1210(m), 1187(s), 1116(s), 1060(s), 957(w), 938(w), 807(s), 760(vs), 686(m), 627(w), 562(w), 466(w), 393(w), 332(m), 309(s), 285(m); HR ESI-MS: *m/z*: 577.21467(calc. 577.21478  $[\text{M-GaCl}_3+\text{Cl}]^+$ , depicted below, top: exp.; bottom: calc.). elemental analysis calcd. (%) for  $\text{C}_{31}\text{H}_{40}\text{N}_4\text{GeGaCl}_3 \cdot 3\text{THF}$ : C 55.32, H 6.91, N 6.00; found: C 55.10, H 6.69, N 6.10.

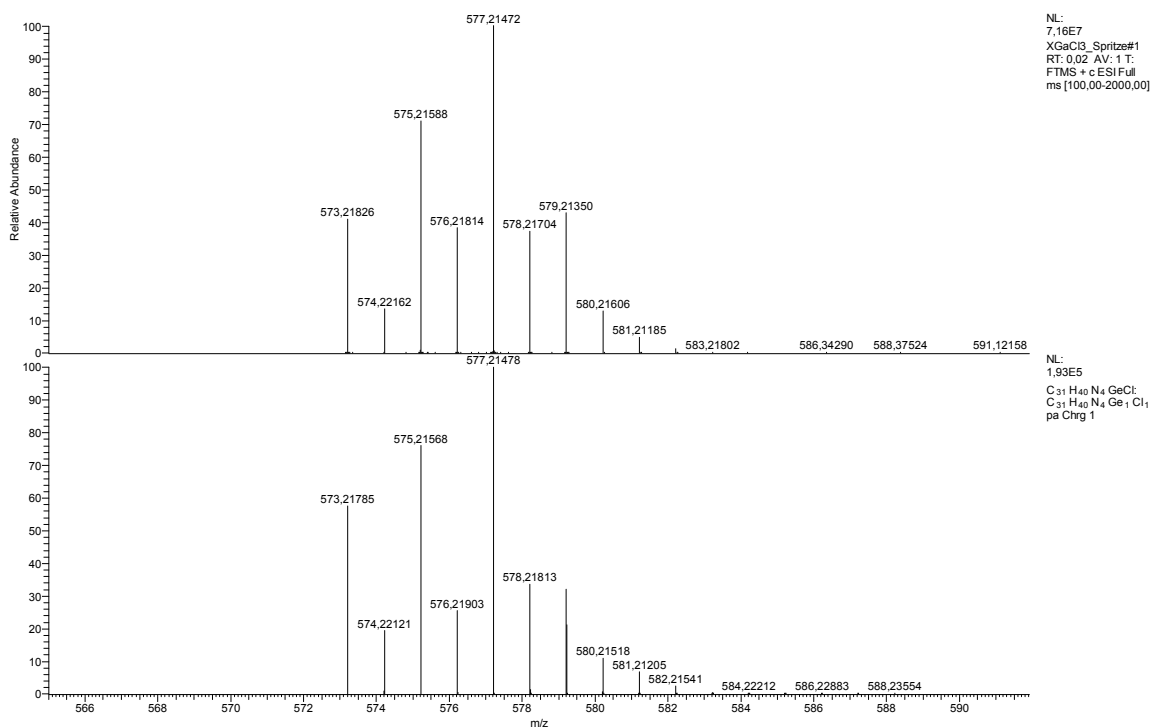

HR ESI-MS spectrum of 1.

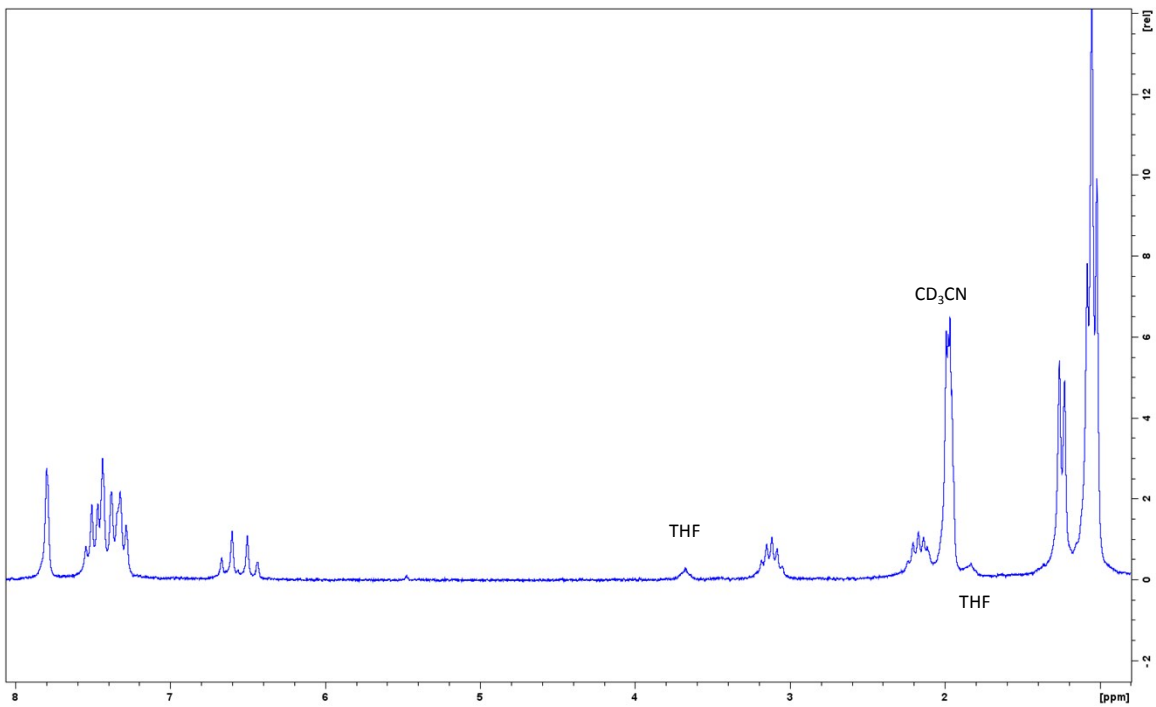

$^1\text{H}$  NMR spectrum of **1**.

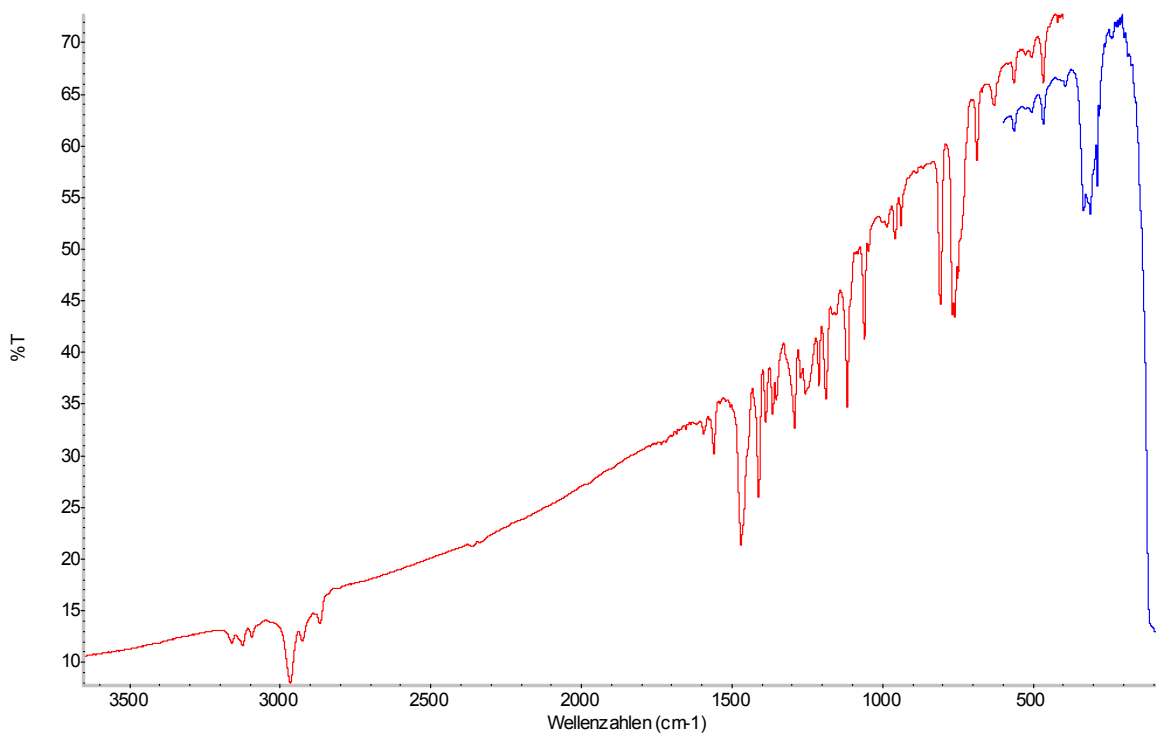

IR spectra (CsI) of **1**.

## Synthesis and Characterisation of 2

To a solution of **1** (0.30 g, 0.42 mmol) in THF (20 mL) was added elemental sulfur (S<sub>8</sub>, 0.027 g, 0.105 mmol) at -30 °C under stirring. The reaction mixture was allowed to warm to room temperature and stirred at that temperature for 2h. The volatiles were evaporated and the residue was washed with n-hexane (10 mL). After dried under vacuum compound **2** was obtained as a colorless powder with a yield of 0.30 g (0.38 mmol, 90%). M. p. 201 °C (decomp.); <sup>1</sup>H NMR (200.13 MHz, [D<sub>3</sub>] CH<sub>3</sub>CN, 25°C): δ = 1.04 (*d*, <sup>3</sup>*J*(H,H) = 7.0 Hz, 12 H; -CH(CH<sub>3</sub>)<sub>3</sub>), 1.31 (*d*, <sup>3</sup>*J*(H,H) = 7.0 Hz, 12 H; -CH(CH<sub>3</sub>)<sub>3</sub>), 2.95 – 3.20 (*m*, 4H; -CH(CH<sub>3</sub>)<sub>3</sub>), 6.80 – 7.00 (*m*, 2 H; CH<sub>2</sub>), 7.30 (*d*, <sup>3</sup>*J*(H,H) = 7.0 Hz, 4 H; *m-Ph*), 7.50 (*dd*, <sup>3</sup>*J*(H,H) = 7.7 Hz, 7.8 Hz, 2 H; *p-Ph*), 7.59 (*d*, <sup>3</sup>*J*(H,H) = 2.0 Hz, 2 H; =CH (imid)), 7.88 (*d*, <sup>3</sup>*J*(H,H) = 2.0 Hz, 2 H; =CH (imid)); HR ESI-MS: *m/z*: 607.19696 (calc. 607.19789 [M-GaCl<sub>3</sub>+H]<sup>+</sup>, depicted below, top: exp.; bottom: calc.). IR (CsI, cm<sup>-1</sup>): 2966 (vs), 2929(s), 2869(s), 1560(w), 1467(vs), 1420(w), 1386(m), 1365(m), 1307(m), 1257(w), 1212(w), 1195(m), 1131(m), 1061(m), 937(w), 808(s), 758(vs), 692(w), 631(w), 499(s), 416(m), 368(vs) (ν<sub>(Ge-S)</sub>); elemental analysis calcd. (%) for C<sub>31</sub>H<sub>40</sub>N<sub>4</sub>GeGaCl<sub>3</sub>S<sub>2</sub>·THF: C 49.25, H 5.67, N 6.56, S 7.51; found: C 48.99, H 5.49, N 6.58, S 7.35.

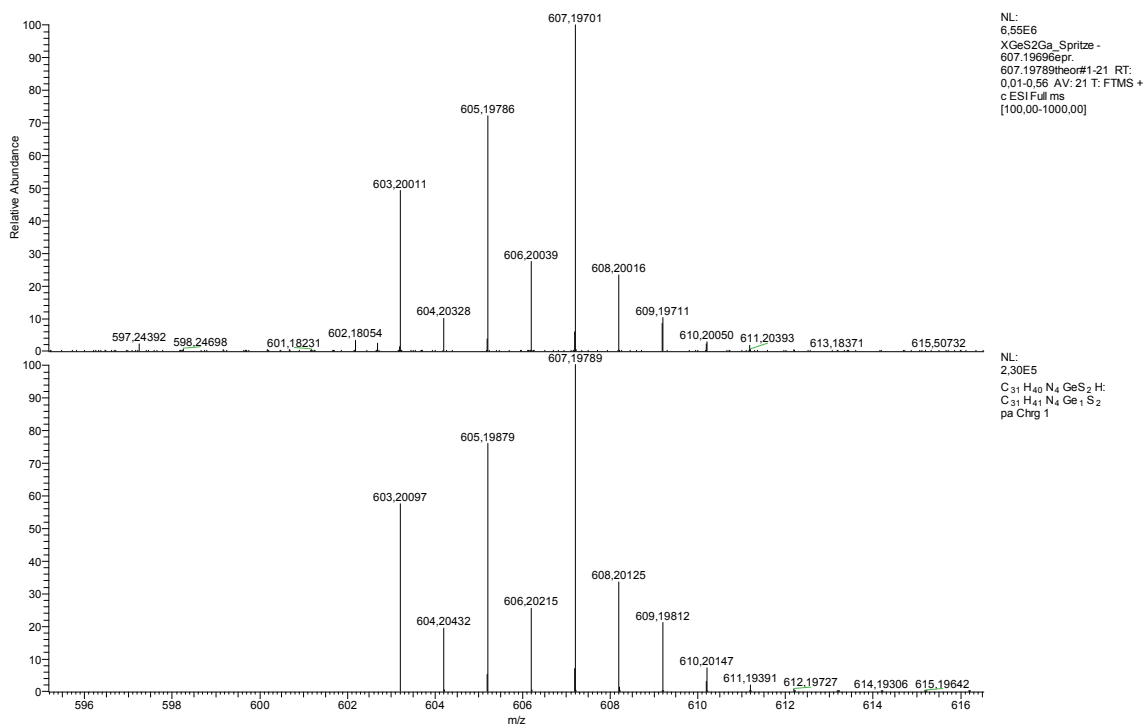

HR ESI-MS spectrum of **2**.

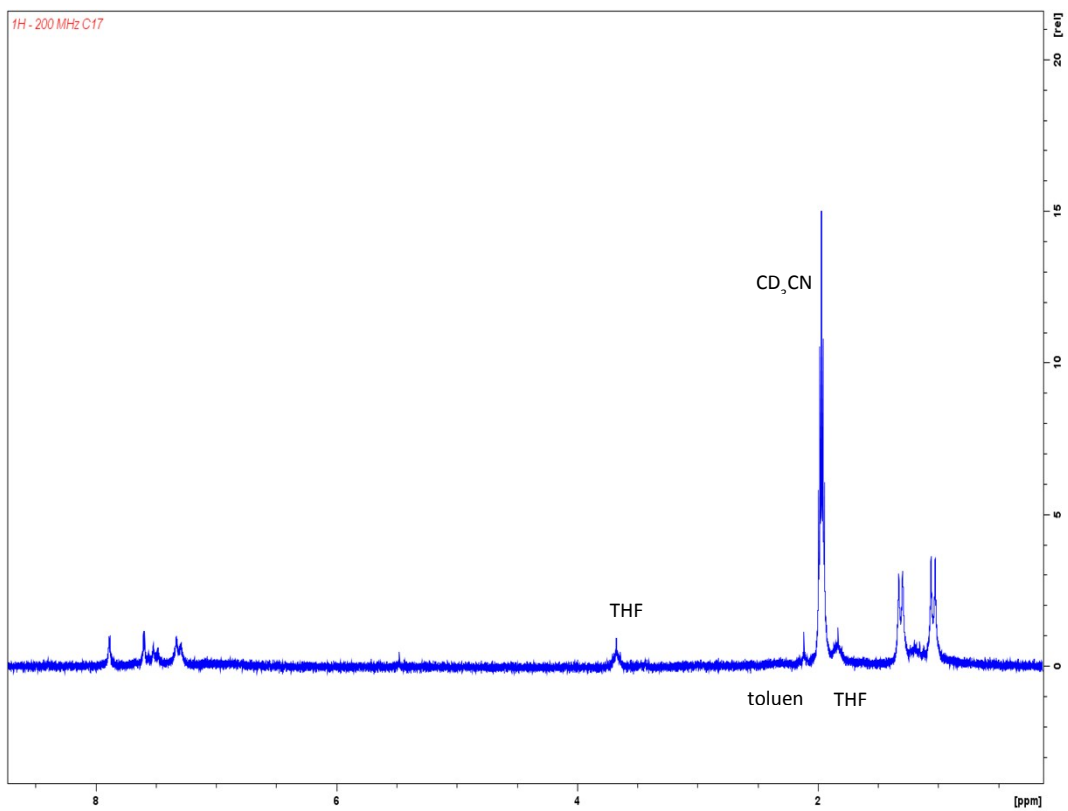

<sup>1</sup>H NMR spectrum of **2**.

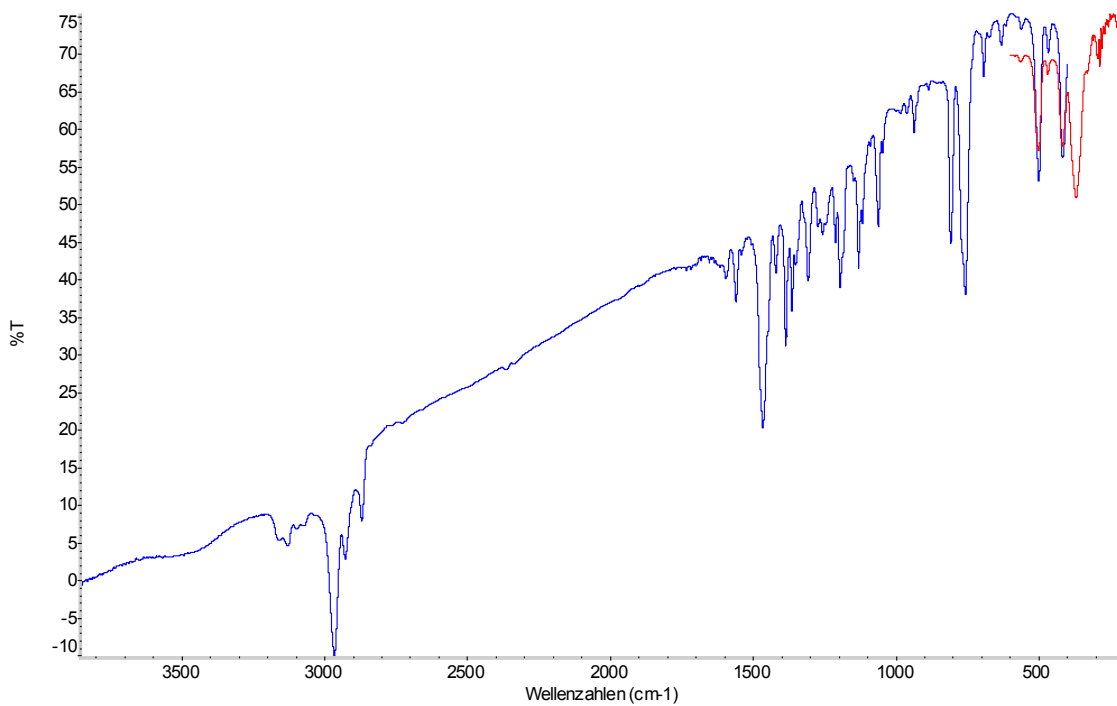

IR spectra (CsI) of **2**.

### Synthesis and Characterisation of 3

To a solution of **1** (0.29 g, 0.40 mmol) in THF (20 mL) was added activated elemental selenium ( $\text{Se}_8$ , 0.063 g, 0.10 mmol) at  $-30\text{ }^\circ\text{C}$  under stirring. The reaction mixture was allowed to warm to room temperature and stirred at that temperature for 2h. The volatiles were evaporated and the residue was washed with n-hexane (10 mL). After dried under vacuum compound **3** was obtained as a colorless powder with a yield of 0.31 g (0.35 mmol, 88%). M. p.  $200\text{ }^\circ\text{C}$  (decomp.);  $^1\text{H NMR}$  (200.13 MHz,  $[\text{D}_3]\text{CH}_3\text{CN}$ ,  $25\text{ }^\circ\text{C}$ ):  $\delta = 1.04$  (*d*,  $^3J(\text{H,H}) = 7.0\text{ Hz}$ , 12 H;  $-\text{CH}(\text{CH}_3)_3$ ), 1.33 (*d*,  $^3J(\text{H,H}) = 7.0\text{ Hz}$ , 12 H;  $-\text{CH}(\text{CH}_3)_3$ ), 2.90 – 3.20 (*m*, 4H;  $-\text{CH}(\text{CH}_3)_3$ ), 6.94 – 7.05 (*m*, 2 H;  $\text{CH}_2$ ), 7.31 (*d*,  $^3J(\text{H,H}) = 7.0\text{ Hz}$ , 4 H; *m-Ph*), 7.52 (*dd*,  $^3J(\text{H,H}) = 7.7\text{ Hz}$ , 7.8 Hz, 2 H; *p-Ph*), 7.59 (*d*,  $^3J(\text{H,H}) = 2.0\text{ Hz}$ , 2 H;  $=\text{CH}$  (imid)), 7.87 (*d*,  $^3J(\text{H,H}) = 2.0\text{ Hz}$ , 2 H;  $=\text{CH}$  (imid)); HR ESI-MS: *m/z*: 703.08749 (calc. 703.08680  $[\text{M-GaCl}_3+\text{H}]^+$ , depicted below, top: exp.; bottom: calc.). IR (CsI,  $\text{cm}^{-1}$ ): 2966(vs), 2928(s), 2869(s), 1562(w), 1467(vs), 1420(w), 1386(m), 1364(m), 1307(m), 1258(w), 1211(w), 1196(m), 1130(m), 1062(m), 807(s), 756(vs), 690(w), 631(w), 467(w), 415(w), 346(vs) ( $\nu_{(\text{Ge-Se})}$ ), 295(m), 285(m); elemental analysis calcd. (%) for  $\text{C}_{31}\text{H}_{40}\text{N}_4\text{GeGaCl}_3\text{Se}_2 \cdot \text{THF}$ : C 44.37, H 5.11, N 5.91; found: C 44.19, H 5.10, N 5.78.

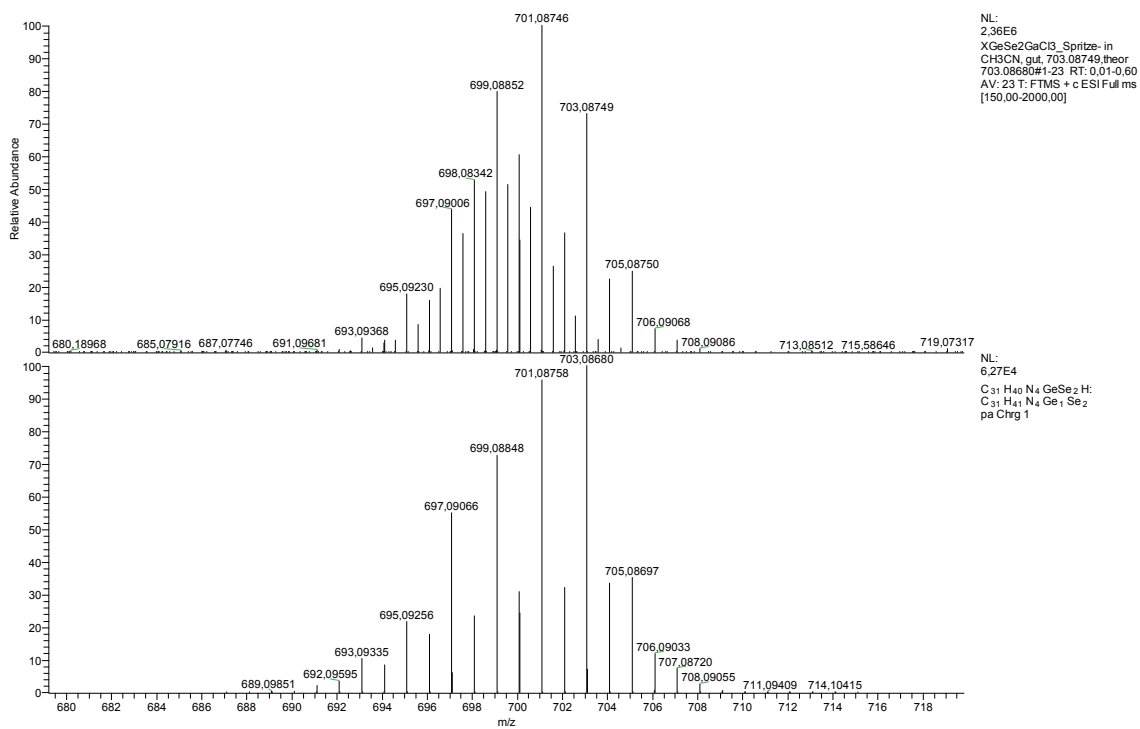

HR ESI-MS spectrum of **3**.

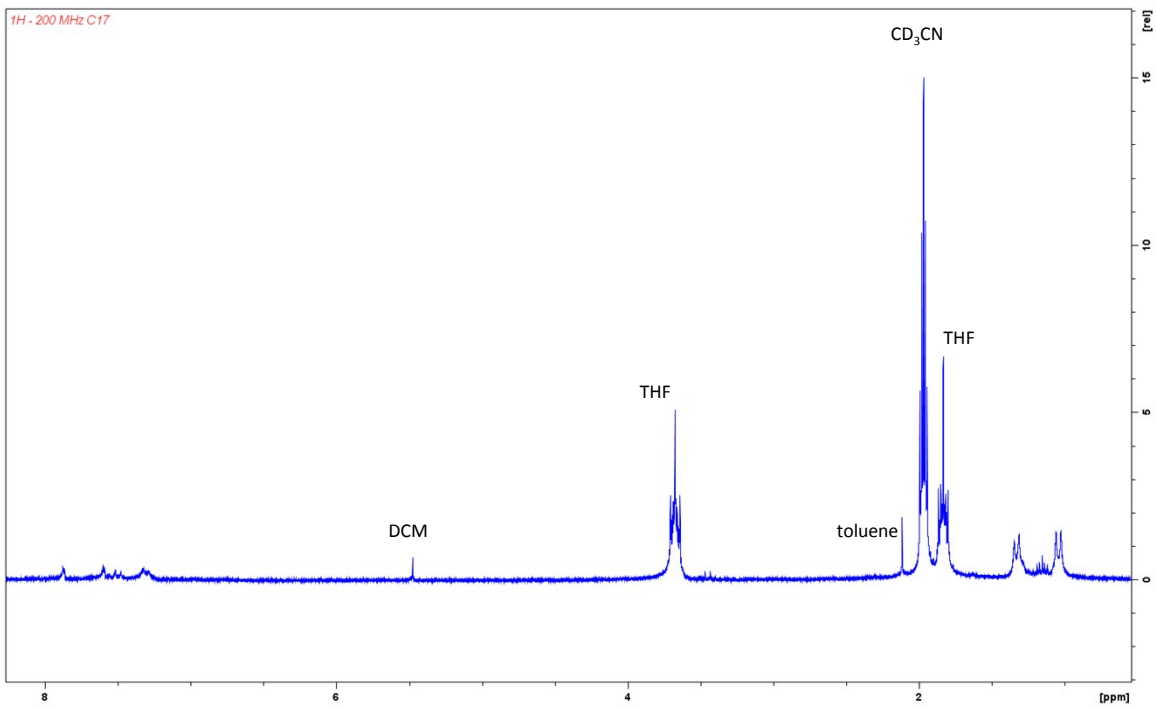

<sup>1</sup>H NMR spectrum of **3**.

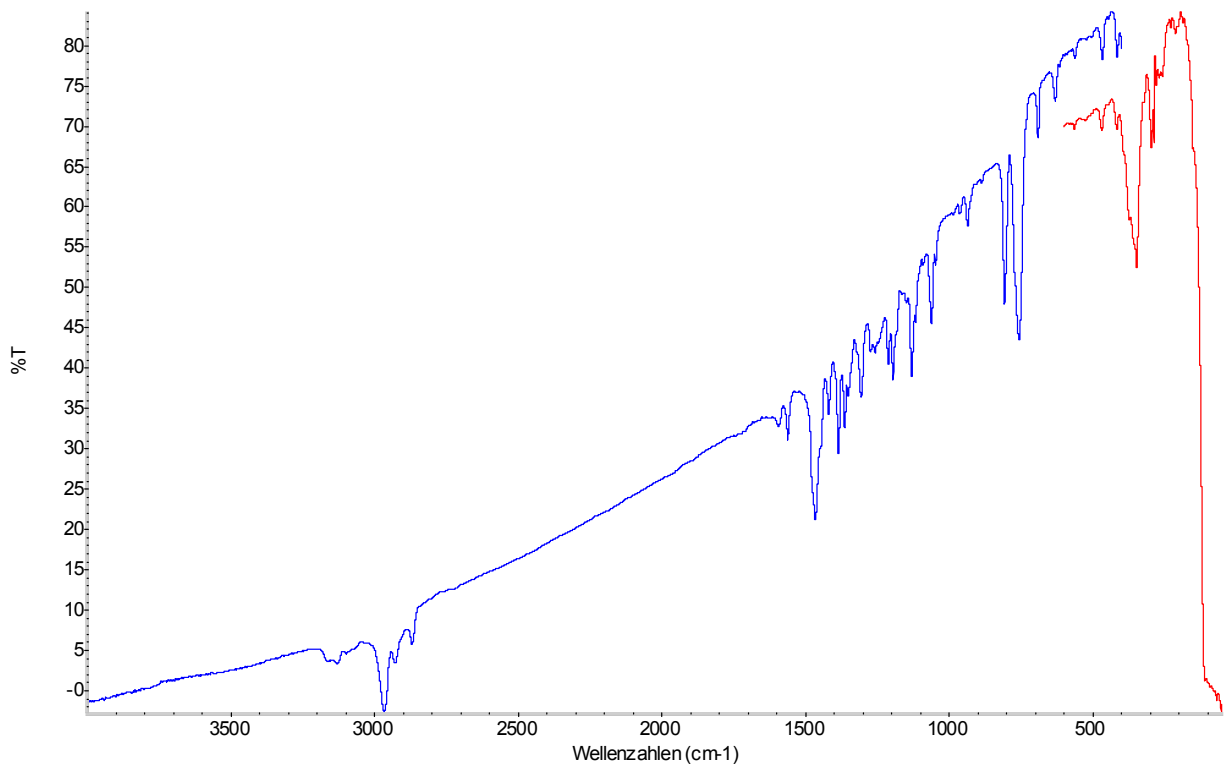

IR spectra (CsI) of **3**.



## Synthesis and Characterisation of 4

At room temperature CH<sub>3</sub>CN (50 mL) was added to a mixture of **1** (0.26 g, 0.36 mmol) and activated selenium Se<sub>8</sub> (0.029 g, 0.045 mmol) under stirring. After 3 days the selenium was completely consumed, and the solution was concentrated to 10 mL. At room temperature colorless crystals were formed slowly from the solution. The collected **4** amounts 0.18 g (0.23 mmol, 64%). M. p. 195 °C (decomp.); <sup>1</sup>H NMR (200.13 MHz, [D<sub>3</sub>] CH<sub>3</sub>CN, 25°C): δ = 1.03 (*d*, <sup>3</sup>*J*(H,H) = 7.0 Hz, 6 H; -CH(CH<sub>3</sub>)<sub>3</sub>), 1.05 (*d*, <sup>3</sup>*J*(H,H) = 7.0 Hz, 6 H; -CH(CH<sub>3</sub>)<sub>3</sub>), 1.16 (*d*, <sup>3</sup>*J*(H,H) = 7.0 Hz, 6 H; -CH(CH<sub>3</sub>)<sub>3</sub>), 1.32 (*d*, <sup>3</sup>*J*(H,H) = 7.0 Hz, 6 H; -CH(CH<sub>3</sub>)<sub>3</sub>), 2.29 (sept., <sup>3</sup>*J*(H,H) = 7.0 Hz, 2 H; -CH(CH<sub>3</sub>)<sub>3</sub>), 3.07 (sept., <sup>3</sup>*J*(H,H) = 7.0 Hz, 2 H; -CH(CH<sub>3</sub>)<sub>3</sub>), 6.56, 7.02 (AB-spin system, <sup>2</sup>*J* = 13.4 Hz; 2 H; CH<sub>2</sub>), 7.30 – 7.40 (*m*, 4 H; *Ph*), 7.50 – 7.58 (*m*, 2 H; *Ph*), 7.51 (*d*, <sup>3</sup>*J*(H,H) = 2.0 Hz, 2 H; =CH(imid)), 7.77 (*d*, <sup>3</sup>*J*(H,H) = 2.0 Hz, 2 H; =CH(imid)); <sup>13</sup>C{<sup>1</sup>H} NMR (100.61 MHz, [D<sub>3</sub>] CH<sub>3</sub>CN, 25 °C): δ = 22.61, 22.88, 24.91, 25.46 (CH(CH<sub>3</sub>)<sub>3</sub>), 27.99, 28.59 (CH(CH<sub>3</sub>)<sub>3</sub>), 63.57 (CH<sub>2</sub>), 123.21 (=CH(imid)), 124.23 (*m-Ph*), 124.86 (*m-Ph*), 126.24 (=CH(imid)), 131.47 (*p-Ph*), 132.60 (*i-Ph*), 145.71 (*o-Ph*), 147.43 (*o-Ph*), 167.00 ppm (carbene-C); HR ESI-MS: *m/z* = 577.21454 (calc. 577.21478 [M-SeGaCl<sub>3</sub>+Cl]<sup>+</sup>, depicted below, top: exp.; bottom: calc.). IR (CsI, cm<sup>-1</sup>): 3130(w), 2969(vs), 2870(w), 1467(vs), 1410(s), 1386(m), 1365(m), 1347(w), 1296(s), 1243(vs), 1211(w), 1193(m), 1121(s), 1062(s), 984(s), 960(w), 938(w), 806(s), 770(s), 758(vs), 690(m), 628(w), 465(w), 417(w), 347(vs) (ν<sub>Ge-Se</sub>), 285(m); elemental analysis calcd. (%) for C<sub>31</sub>H<sub>40</sub>N<sub>4</sub>GeSeGaCl<sub>3</sub>·CH<sub>3</sub>CN: C 47.33, H 5.18, N 8.36; found: C 47.24, H 5.03, N 8.23.

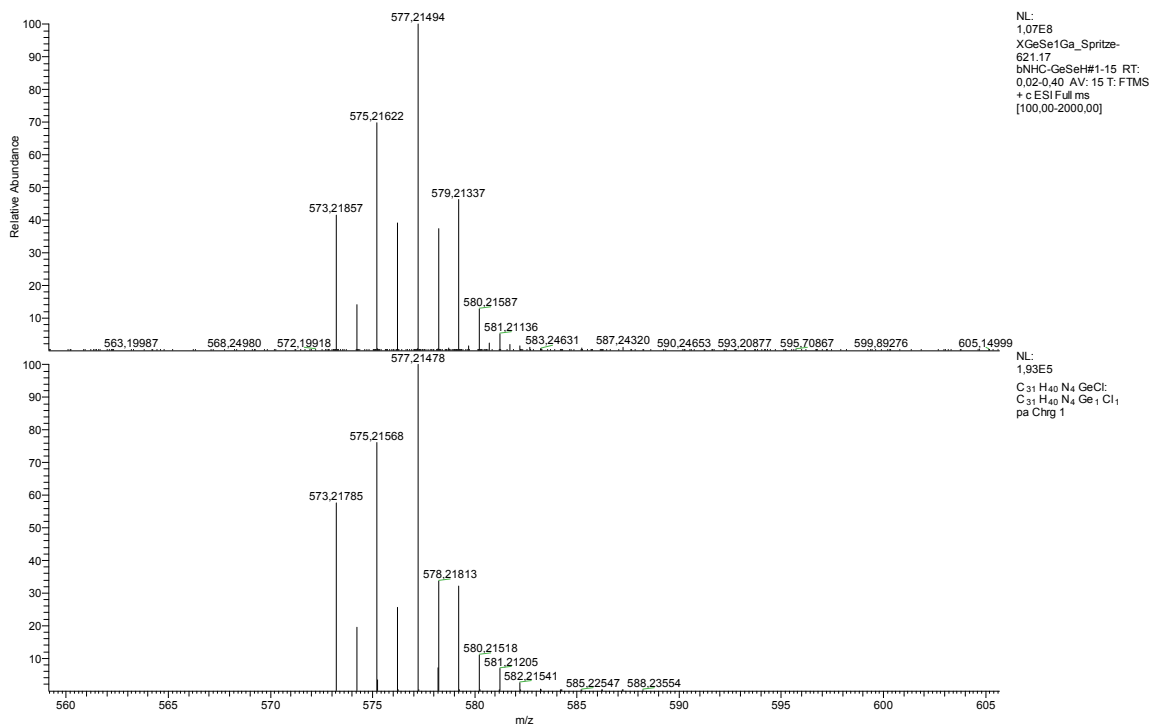

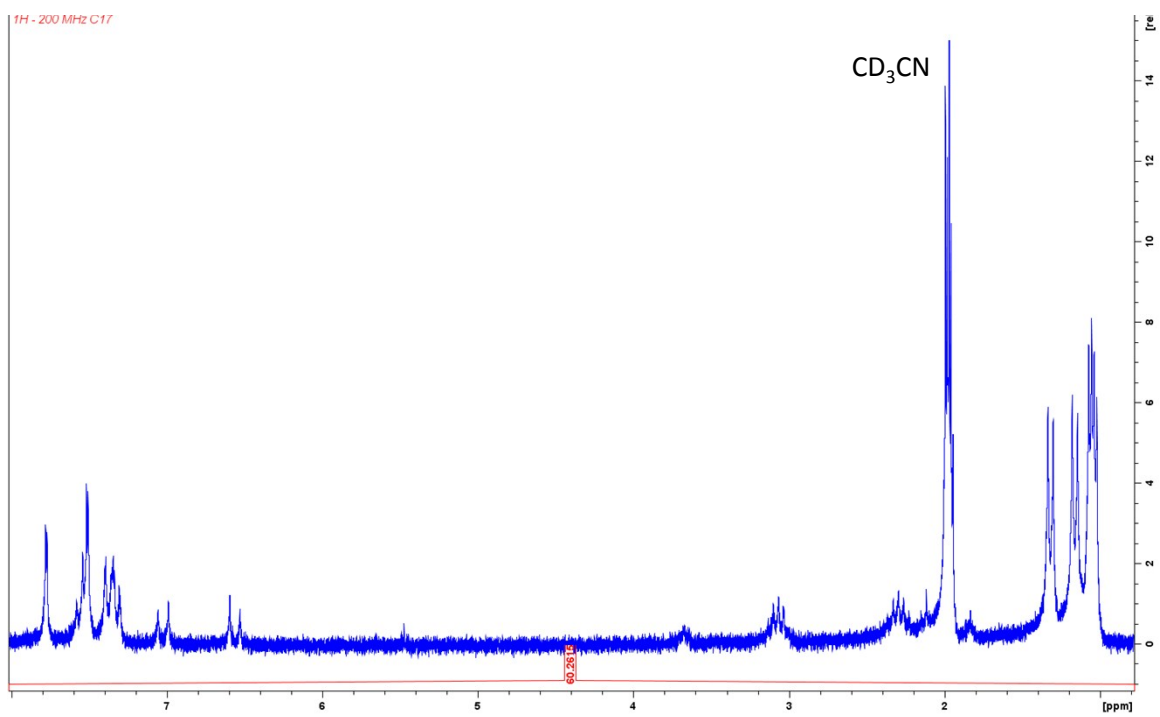

$^1\text{H}$  NMR spectrum of 4.

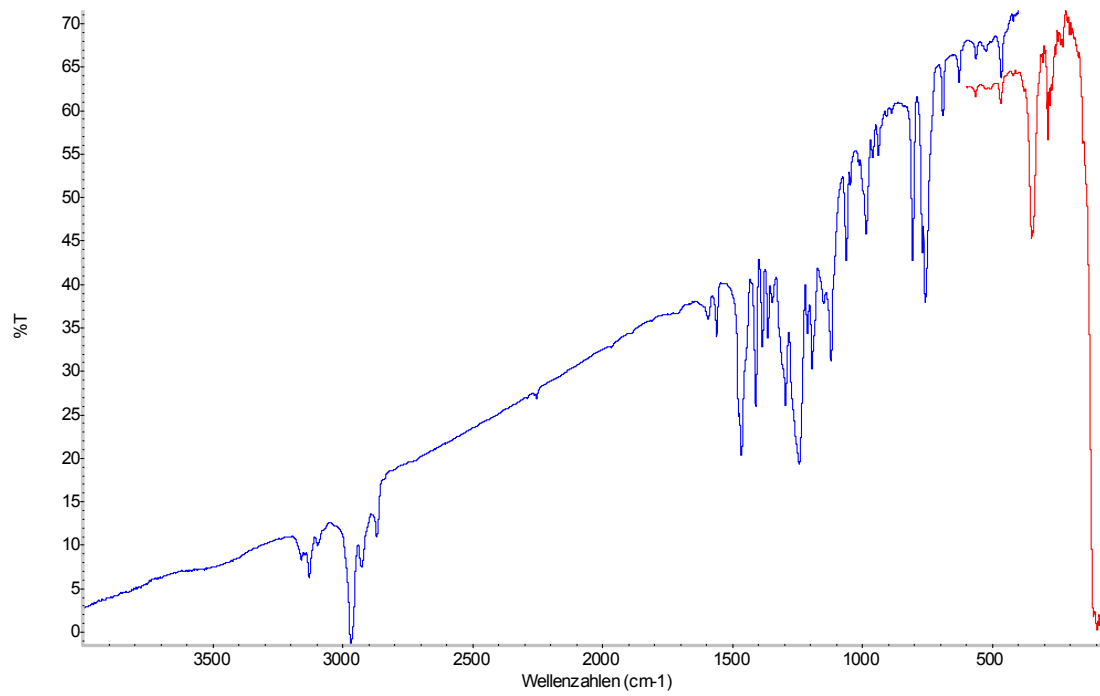

IR spectra (CsI) of 4.

## Synthesis and Characterisation of **5**

At room temperature THF (25 mL) was added to a mixture of **1** (0.25 g, 0.35 mmol) and tellurium Te (0.044 g, 0.35 mmol) under stirring. After 3 days the tellurium was completely consumed, and the solution was concentrated to 10 mL. At room temperature pale yellow crystals were formed slowly from the solution. The collected **5** amounts to 0.21 g (0.25 mmol, 71%). M. p. 180 °C (decomp.); <sup>1</sup>H NMR (200.13 MHz, [D<sub>3</sub>] CH<sub>3</sub>CN, 25°C): δ = 1.04 (*d*, <sup>3</sup>*J*(H,H) = 7.0 Hz, 6 H; -CH(CH<sub>3</sub>)<sub>3</sub>), 1.06 (*d*, <sup>3</sup>*J*(H,H) = 7.0 Hz, 6 H; -CH(CH<sub>3</sub>)<sub>3</sub>), 1.19 (*d*, <sup>3</sup>*J*(H,H) = 7.0 Hz, 6 H; -CH(CH<sub>3</sub>)<sub>3</sub>), 1.36 (*d*, <sup>3</sup>*J*(H,H) = 7.0 Hz, 6 H; -CH(CH<sub>3</sub>)<sub>3</sub>), 2.37 (sept., <sup>3</sup>*J*(H,H) = 7.0 Hz, 2 H; -CH(CH<sub>3</sub>)<sub>3</sub>), 2.97 (sept., <sup>3</sup>*J*(H,H) = 7.0 Hz, 2 H; -CH(CH<sub>3</sub>)<sub>3</sub>), 6.56, 6.90 (AB-spin system, <sup>2</sup>*J* = 13.1 Hz; 2 H; CH<sub>2</sub>), 7.32 – 7.38 (*m*, 4 H; *Ph*), 7.50 – 7.56 (*m*, 2 H; *Ph*), 7.53 (*d*, <sup>3</sup>*J*(H,H) = 2.0 Hz, 2 H; =CH (imid)), 7.79 (*d*, <sup>3</sup>*J*(H,H) = 2.0 Hz, 2 H; =CH (imid)); <sup>13</sup>C {<sup>1</sup>H} NMR (100.61 MHz, [D<sub>3</sub>] CH<sub>3</sub>CN, 25 °C): δ = 22.51, 22.92, 24.66, 25.29 (CH(CH<sub>3</sub>)<sub>3</sub>), 27.68, 28.25 (CH(CH<sub>3</sub>)<sub>3</sub>), 63.00 (CH<sub>2</sub>), 123.19 (=CH(imid)), 124.02 (*m-Ph*), 124.71(*m-Ph*), 126.13 (=CH(imid)), 131.19 (*p-Ph*), 132.23(*i-Ph*), 145.31(*o-Ph*), 146.86 (*o-Ph*), 165.54 ppm (carbene-C); HR ESI-MS: *m/z*: = 577.21399 (calc. 577.21478 [M-Te-GaCl<sub>3</sub>+Cl]<sup>+</sup>, depicted below, top: exp.; bottom: calc.). IR (CsI, cm<sup>-1</sup>): 3130(w), 2966(vs), 2867(m), 1563(w), 1466(vs), 1410(s), 1386(m), 1364(m), 1294(w), 1257(w), 1210(w), 1194(m), 1120(s), 1060(s), 806(s), 758(s), 744(s), 687(m), 625(w), 466(w), 361(vs), 336(s), 286(s), 278(m), 268(w), 254(w), 247(w), 226(s) (ν<sub>Ge-Te</sub>), 202(m); elemental analysis calc. (%) for C<sub>31</sub>H<sub>40</sub>N<sub>4</sub>GeTeGaCl<sub>3</sub>·2THF: C 47.36, H 5.71, N 5.66; found: C 47.15, H 5.55, N 5.53.

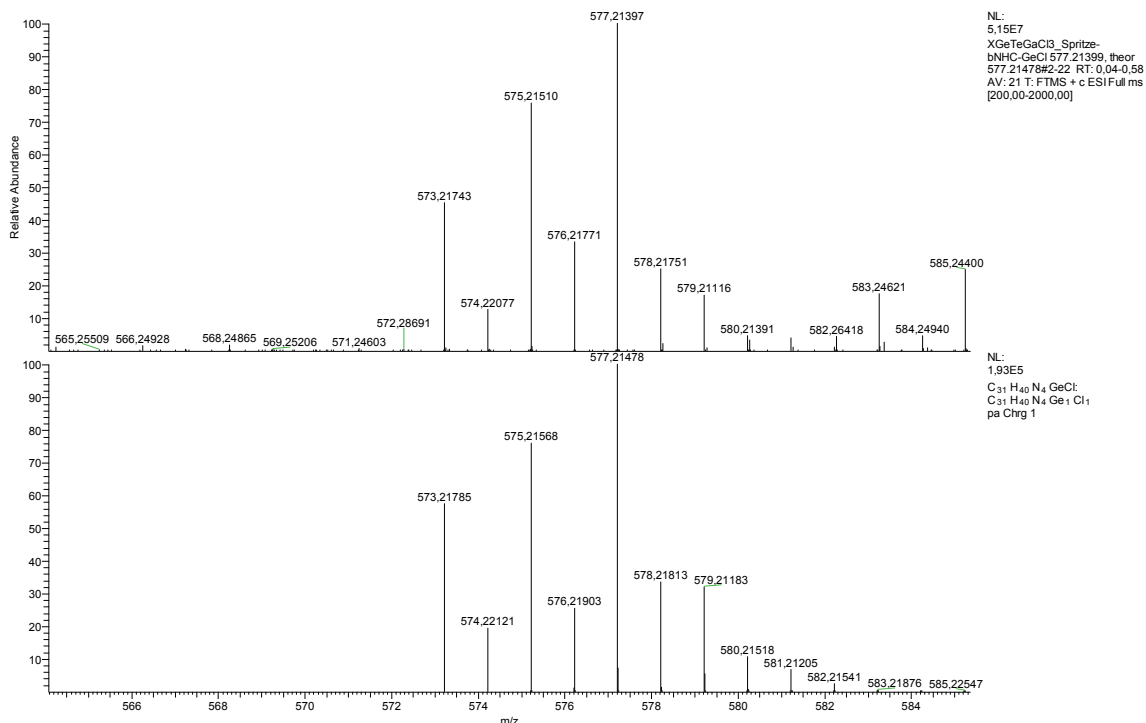

HR ESI-MS spectrum of **5**.

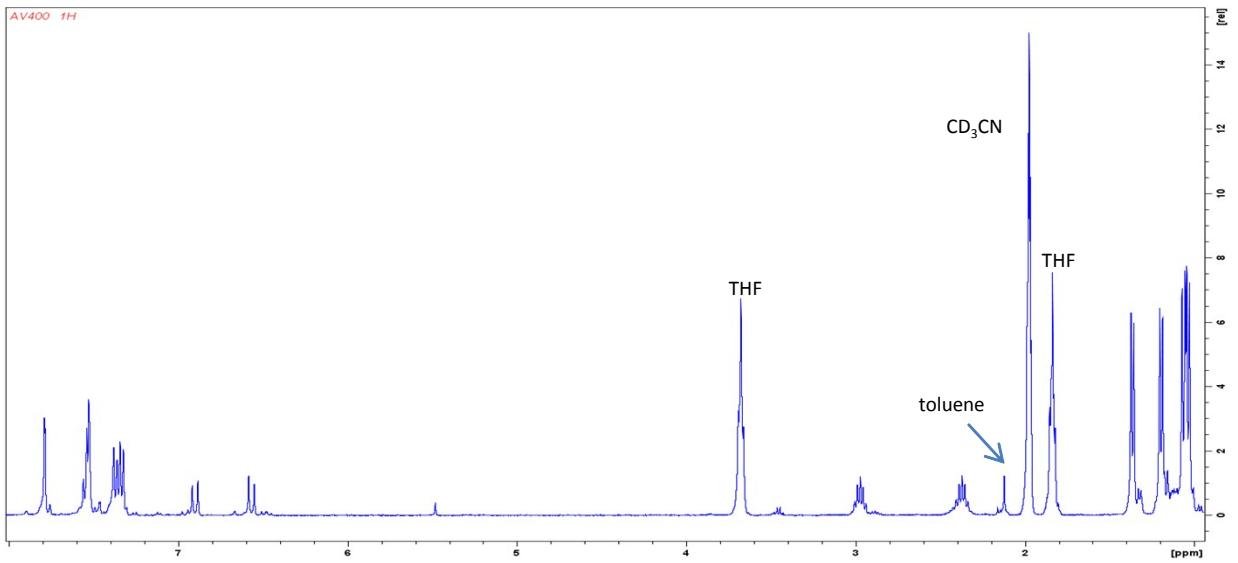

$^1\text{H}$  NMR spectrum of **5**.

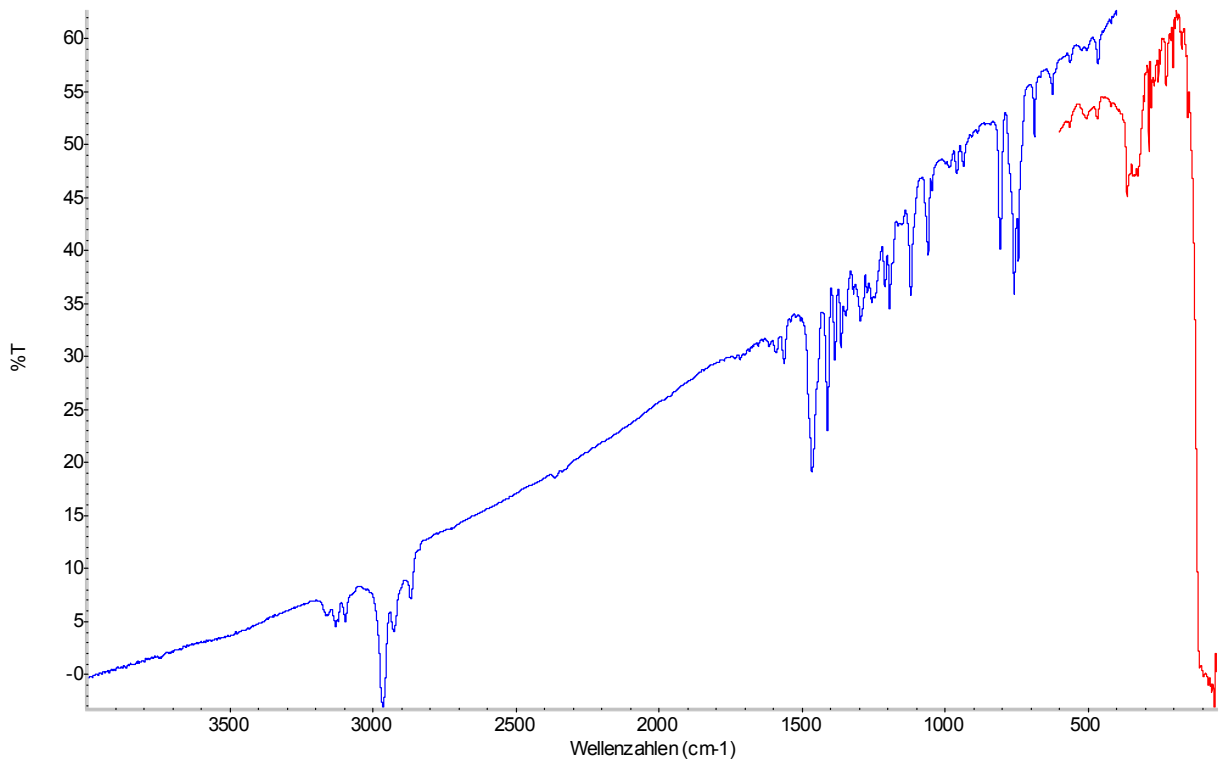

IR spectra (CsI) of **5**.

## B. Crystallographic data

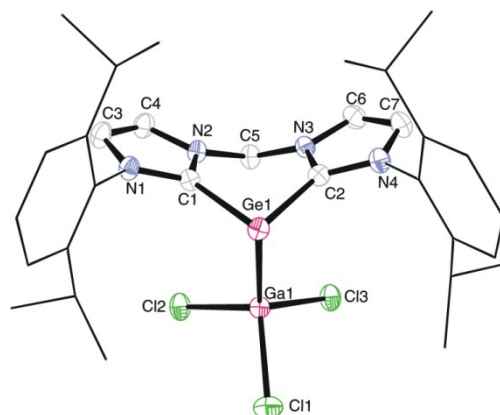

**Figure S 1.** Molecular structure of compound **1**. Thermal ellipsoids are drawn at 50% probability level. H atoms and four lattice solvent CH<sub>3</sub>CN molecules are omitted for clarity.

**Table S1.** Crystal data and structure refinement for **1**.

|                                 |                                                                      |                                                                                               |
|---------------------------------|----------------------------------------------------------------------|-----------------------------------------------------------------------------------------------|
| Empirical formula               | C <sub>39</sub> H <sub>52</sub> Cl <sub>3</sub> Ga Ge N <sub>8</sub> |                                                                                               |
| Formula weight                  | 881.55                                                               |                                                                                               |
| Temperature                     | 150(2) K                                                             |                                                                                               |
| Wavelength                      | 1.5418 Å                                                             |                                                                                               |
| Crystal system                  | Triclinic                                                            |                                                                                               |
| Space group                     | P-1                                                                  |                                                                                               |
| Unit cell dimensions            | a = 12.8149(4) Å<br>b = 13.6703(4) Å<br>c = 14.6341(4) Å             | $\alpha = 109.690(3)^\circ$ .<br>$\beta = 90.728(2)^\circ$ .<br>$\gamma = 112.290(3)^\circ$ . |
| Volume                          | 2204.15(11) Å <sup>3</sup>                                           |                                                                                               |
| Z                               | 2                                                                    |                                                                                               |
| Density (calculated)            | 1.328 Mg/m <sup>3</sup>                                              |                                                                                               |
| Absorption coefficient          | 3.541 mm <sup>-1</sup>                                               |                                                                                               |
| F(000)                          | 912                                                                  |                                                                                               |
| Crystal size                    | 0.23 x 0.18 x 0.10 mm <sup>3</sup>                                   |                                                                                               |
| Theta range for data collection | 3.25 to 67.49°.                                                      |                                                                                               |

|                                   |                                             |
|-----------------------------------|---------------------------------------------|
| Index ranges                      | -11<=h<=15, -16<=k<=13, -16<=l<=17          |
| Reflections collected             | 14861                                       |
| Independent reflections           | 7940 [R(int) = 0.0292]                      |
| Completeness to theta = 67.49°    | 99.5 %                                      |
| Absorption correction             | Semi-empirical from equivalents             |
| Max. and min. transmission        | 1.00000 and 0.15591                         |
| Refinement method                 | Full-matrix least-squares on F <sup>2</sup> |
| Data / restraints / parameters    | 7940 / 0 / 481                              |
| Goodness-of-fit on F <sup>2</sup> | 1.092                                       |
| Final R indices [I>2sigma(I)]     | R1 = 0.0458, wR2 = 0.1244                   |
| R indices (all data)              | R1 = 0.0493, wR2 = 0.1268                   |
| Largest diff. peak and hole       | 1.685 and -0.514 e.Å <sup>-3</sup>          |

**Table S2.** Selected interatomic distances [Å] and angles [°] for compound **1**.

|             |           |
|-------------|-----------|
| Ge(1)-C(2)  | 2.033(3)  |
| Ge(1)-C(1)  | 2.043(3)  |
| Ge(1)-Ga(1) | 2.5202(5) |
| Ga(1)-Cl(1) | 2.2464(8) |
| Ga(1)-Cl(3) | 2.2529(8) |
| Ga(1)-Cl(2) | 2.2576(8) |
| N(1)-C(1)   | 1.349(4)  |
| N(1)-C(3)   | 1.382(4)  |
| C(1)-N(2)   | 1.354(4)  |
| N(2)-C(4)   | 1.386(4)  |
| N(2)-C(5)   | 1.461(4)  |
| C(2)-N(4)   | 1.349(4)  |
| C(2)-N(3)   | 1.360(4)  |
| N(3)-C(6)   | 1.385(4)  |
| N(3)-C(5)   | 1.454(4)  |
| C(3)-C(4)   | 1.346(5)  |
| N(4)-C(7)   | 1.389(4)  |
| C(6)-C(7)   | 1.348(5)  |

|                   |           |
|-------------------|-----------|
| C(2)-Ge(1)-C(1)   | 85.67(12) |
| C(2)-Ge(1)-Ga(1)  | 89.78(8)  |
| C(1)-Ge(1)-Ga(1)  | 90.83(8)  |
| Cl(1)-Ga(1)-Cl(3) | 104.36(3) |
| Cl(1)-Ga(1)-Cl(2) | 104.79(3) |
| Cl(3)-Ga(1)-Cl(2) | 98.87(3)  |
| Cl(1)-Ga(1)-Ge(1) | 112.27(3) |
| Cl(3)-Ga(1)-Ge(1) | 118.14(3) |
| Cl(2)-Ga(1)-Ge(1) | 116.58(2) |
| C(1)-N(1)-C(3)    | 110.7(2)  |
| N(1)-C(1)-N(2)    | 104.6(2)  |
| N(1)-C(1)-Ge(1)   | 128.8(2)  |
| N(2)-C(1)-Ge(1)   | 126.6(2)  |
| C(1)-N(2)-C(4)    | 111.4(2)  |
| C(1)-N(2)-C(5)    | 123.8(2)  |
| C(4)-N(2)-C(5)    | 124.3(2)  |
| N(4)-C(2)-N(3)    | 105.2(3)  |
| N(4)-C(2)-Ge(1)   | 128.3(2)  |
| N(3)-C(2)-Ge(1)   | 126.4(2)  |
| C(2)-N(3)-C(6)    | 110.7(3)  |
| C(2)-N(3)-C(5)    | 124.0(2)  |
| C(6)-N(3)-C(5)    | 124.5(2)  |
| C(4)-C(3)-N(1)    | 107.5(3)  |
| C(2)-N(4)-C(7)    | 110.4(3)  |
| C(3)-C(4)-N(2)    | 105.8(3)  |
| N(3)-C(5)-N(2)    | 110.4(2)  |
| C(7)-C(6)-N(3)    | 106.5(3)  |
| C(6)-C(7)-N(4)    | 107.2(3)  |

---

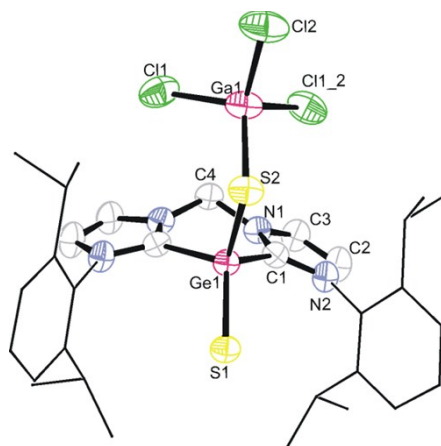

**Figure S2.** Molecular structure of compound **2**. Thermal ellipsoids are drawn at 50% probability level. H atoms and two lattice solvent THF molecules are omitted for clarity.

**Table S3.** Crystal data and structure refinement for **2**.

|                                 |                                                                                                               |
|---------------------------------|---------------------------------------------------------------------------------------------------------------|
| Empirical formula               | C <sub>39</sub> H <sub>56</sub> Cl <sub>3</sub> Ga Ge N <sub>4</sub> O <sub>2</sub> S <sub>2</sub>            |
| Formula weight                  | 925.66                                                                                                        |
| Temperature                     | 150(2) K                                                                                                      |
| Wavelength                      | 1.54184 Å                                                                                                     |
| Crystal system                  | Monoclinic                                                                                                    |
| Space group                     | Cm                                                                                                            |
| Unit cell dimensions            | a = 16.3230(2) Å      α = 90°.<br>b = 21.5944(3) Å      β = 109.7720(10)°.<br>c = 7.62520(10) Å      γ = 90°. |
| Volume                          | 2529.32(6) Å <sup>3</sup>                                                                                     |
| Z                               | 2                                                                                                             |
| Density (calculated)            | 1.215 Mg/m <sup>3</sup>                                                                                       |
| Absorption coefficient          | 3.865 mm <sup>-1</sup>                                                                                        |
| F(000)                          | 960                                                                                                           |
| Crystal size                    | 0.16 x 0.12 x 0.07 mm <sup>3</sup>                                                                            |
| Theta range for data collection | 3.53 to 67.50°.                                                                                               |
| Index ranges                    | -19 ≤ h ≤ 17, -24 ≤ k ≤ 25, -8 ≤ l ≤ 9                                                                        |
| Reflections collected           | 8297                                                                                                          |
| Independent reflections         | 3656 [R(int) = 0.0215]                                                                                        |
| Completeness to theta = 67.50°  | 99.4 %                                                                                                        |



|                                   |                                             |
|-----------------------------------|---------------------------------------------|
| Absorption correction             | Semi-empirical from equivalents             |
| Max. and min. transmission        | 1.00000 and 0.61062                         |
| Refinement method                 | Full-matrix least-squares on F <sup>2</sup> |
| Data / restraints / parameters    | 3656 / 2 / 248                              |
| Goodness-of-fit on F <sup>2</sup> | 1.123                                       |
| Final R indices [I>2sigma(I)]     | R1 = 0.0423, wR2 = 0.1193                   |
| R indices (all data)              | R1 = 0.0435, wR2 = 0.1207                   |
| Absolute structure parameter      | 0.03(2)                                     |
| Largest diff. peak and hole       | 1.188 and -0.431 e.Å <sup>-3</sup>          |

**Table S4.** Selected interatomic distances [Å] and angles [°] for compound **2**.

|                   |            |
|-------------------|------------|
| Ge(1)-C(1)        | 1.998(3)   |
| Ge(1)-S(1)        | 2.0873(12) |
| Ge(1)-S(2)        | 2.1981(13) |
| Ga(1)-Cl(2)       | 2.1810(18) |
| Ga(1)-Cl(1)       | 2.2027(14) |
| Ga(1)-S(2)        | 2.2493(15) |
| N(1)-C(1)         | 1.358(4)   |
| N(1)-C(3)         | 1.370(5)   |
| N(1)-C(4)         | 1.449(4)   |
| C(1)-N(2)         | 1.329(5)   |
| N(2)-C(2)         | 1.388(5)   |
| N(2)-C(5)         | 1.457(5)   |
| C(2)-C(3)         | 1.353(6)   |
| C(1)-Ge(1)-S(1)   | 112.99(11) |
| C(1)-Ge(1)-S(2)   | 110.94(11) |
| S(1)-Ge(1)-S(2)   | 115.26(5)  |
| Cl(2)-Ga(1)-Cl(1) | 108.95(5)  |
| Cl(2)-Ga(1)-S(2)  | 108.53(8)  |
| Cl(1)-Ga(1)-S(2)  | 112.01(4)  |
| C(1)-N(1)-C(3)    | 110.2(3)   |
| C(1)-N(1)-C(4)    | 126.1(3)   |

|                  |           |
|------------------|-----------|
| C(3)-N(1)-C(4)   | 123.1(3)  |
| N(2)-C(1)-N(1)   | 105.8(3)  |
| N(2)-C(1)-Ge(1)  | 130.6(2)  |
| N(1)-C(1)-Ge(1)  | 123.2(2)  |
| Ge(1)-S(2)-Ga(1) | 107.91(6) |
| C(1)-N(2)-C(2)   | 110.7(3)  |
| C(1)-N(2)-C(5)   | 126.5(3)  |
| C(2)-N(2)-C(5)   | 122.7(3)  |
| C(3)-C(2)-N(2)   | 106.3(3)  |
| C(2)-C(3)-N(1)   | 107.0(3)  |

Symmetry transformations used to generate equivalent atoms:

#1 x,-y+1,z

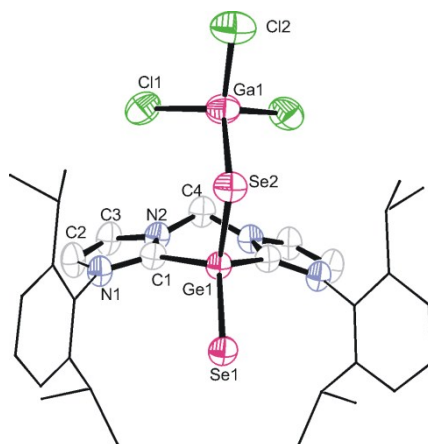

**Figure S 3.** Molecular structure of compound **3**. Thermal ellipsoids are drawn at 50% probability level. H atoms and two lattice solvent THF molecules are omitted for clarity.

**Table S5.** Crystal data and structure refinement for **3**.

|                   |                                                                                                     |
|-------------------|-----------------------------------------------------------------------------------------------------|
| Empirical formula | C <sub>39</sub> H <sub>56</sub> Cl <sub>3</sub> Ga Ge N <sub>4</sub> O <sub>2</sub> Se <sub>2</sub> |
| Formula weight    | 1019.46                                                                                             |
| Temperature       | 150(2) K                                                                                            |
| Wavelength        | 1.54184 Å                                                                                           |

|                                   |                                             |                              |
|-----------------------------------|---------------------------------------------|------------------------------|
| Crystal system                    | Monoclinic                                  |                              |
| Space group                       | Cm                                          |                              |
| Unit cell dimensions              | a = 16.2434(7) Å                            | $\alpha = 90^\circ$ .        |
|                                   | b = 21.8215(9) Å                            | $\beta = 110.197(4)^\circ$ . |
|                                   | c = 7.6828(3) Å                             | $\gamma = 90^\circ$ .        |
| Volume                            | 2555.76(18) Å <sup>3</sup>                  |                              |
| Z                                 | 2                                           |                              |
| Density (calculated)              | 1.325 Mg/m <sup>3</sup>                     |                              |
| Absorption coefficient            | 4.691 mm <sup>-1</sup>                      |                              |
| F(000)                            | 1032                                        |                              |
| Crystal size                      | 0.18 x 0.13 x 0.05 mm <sup>3</sup>          |                              |
| Theta range for data collection   | 3.54 to 67.46°.                             |                              |
| Index ranges                      | -19<=h<=18, -25<=k<=26, -9<=l<=8            |                              |
| Reflections collected             | 7876                                        |                              |
| Independent reflections           | 3421 [R(int) = 0.0326]                      |                              |
| Completeness to theta = 67.46°    | 99.6 %                                      |                              |
| Absorption correction             | Semi-empirical from equivalents             |                              |
| Max. and min. transmission        | 1.00000 and 0.58147                         |                              |
| Refinement method                 | Full-matrix least-squares on F <sup>2</sup> |                              |
| Data / restraints / parameters    | 3421 / 2 / 248                              |                              |
| Goodness-of-fit on F <sup>2</sup> | 1.086                                       |                              |
| Final R indices [I>2sigma(I)]     | R1 = 0.0443, wR2 = 0.1221                   |                              |
| R indices (all data)              | R1 = 0.0456, wR2 = 0.1245                   |                              |
| Absolute structure parameter      | 0.03(3)                                     |                              |
| Largest diff. peak and hole       | 1.265 and -0.701 e.Å <sup>-3</sup>          |                              |

**Table S6.** Crystal data and structure refinement for **3**.

|             |            |
|-------------|------------|
| Se(1)-Ge(1) | 2.2144(9)  |
| Ge(1)-C(1)  | 1.987(5)   |
| Ge(1)-Se(2) | 2.3263(10) |
| Ga(1)-Cl(2) | 2.179(3)   |
| Ga(1)-Cl(1) | 2.2086(18) |

|                   |            |
|-------------------|------------|
| Ga(1)-Se(2)       | 2.3738(12) |
| C(1)-N(1)         | 1.352(6)   |
| C(1)-N(2)         | 1.366(6)   |
| C(2)-C(3)         | 1.361(8)   |
| C(2)-N(1)         | 1.362(7)   |
| C(3)-N(2)         | 1.383(7)   |
| C(4)-N(2)         | 1.442(6)   |
| C(1)-Ge(1)-Se(1)  | 112.96(14) |
| C(1)-Ge(1)-Se(2)  | 110.84(15) |
| Se(1)-Ge(1)-Se(2) | 115.19(4)  |
| Cl(2)-Ga(1)-Cl(1) | 108.74(7)  |
| Cl(2)-Ga(1)-Se(2) | 108.41(10) |
| Cl(1)-Ga(1)-Se(2) | 111.94(5)  |
| N(1)-C(1)-N(2)    | 105.0(4)   |
| N(1)-C(1)-Ge(1)   | 131.6(3)   |
| N(2)-C(1)-Ge(1)   | 123.0(3)   |
| C(3)-C(2)-N(1)    | 107.7(5)   |
| C(2)-C(3)-N(2)    | 106.0(4)   |
| C(1)-N(2)-C(3)    | 110.4(4)   |
| C(1)-N(2)-C(4)    | 126.5(4)   |
| C(3)-N(2)-C(4)    | 122.6(4)   |
| Ge(1)-Se(2)-Ga(1) | 104.88(4)  |

---

Symmetry transformations used to generate equivalent atoms:

#1 x,-y,z

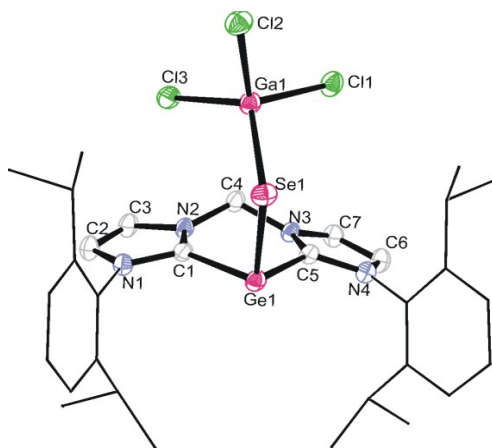

**Figure S 4.** Molecular structure of compound **4**. Thermal ellipsoids are drawn at 50% probability level. H atoms and one lattice solvent CH<sub>3</sub>CN molecule are omitted for clarity.

**Table S7.** Crystal data and structure refinement for **4**.

|                                 |                                                                         |                   |
|---------------------------------|-------------------------------------------------------------------------|-------------------|
| Empirical formula               | C <sub>33</sub> H <sub>43</sub> Cl <sub>3</sub> Ga Ge N <sub>5</sub> Se |                   |
| Formula weight                  | 837.34                                                                  |                   |
| Temperature                     | 150(2) K                                                                |                   |
| Wavelength                      | 1.54184 Å                                                               |                   |
| Crystal system                  | Monoclinic                                                              |                   |
| Space group                     | P21/c                                                                   |                   |
| Unit cell dimensions            | a = 12.53200(10) Å                                                      | α = 90°.          |
|                                 | b = 18.88550(10) Å                                                      | β = 90.0910(10)°. |
|                                 | c = 16.07690(10) Å                                                      | γ = 90°.          |
| Volume                          | 3804.96(4) Å <sup>3</sup>                                               |                   |
| Z                               | 4                                                                       |                   |
| Density (calculated)            | 1.462 Mg/m <sup>3</sup>                                                 |                   |
| Absorption coefficient          | 5.094 mm <sup>-1</sup>                                                  |                   |
| F(000)                          | 1696                                                                    |                   |
| Crystal size                    | 0.27 x 0.19 x 0.14 mm <sup>3</sup>                                      |                   |
| Theta range for data collection | 3.53 to 67.50°.                                                         |                   |
| Index ranges                    | -12 ≤ h ≤ 15, -22 ≤ k ≤ 21, -17 ≤ l ≤ 19                                |                   |
| Reflections collected           | 24155                                                                   |                   |

|                                   |                                             |
|-----------------------------------|---------------------------------------------|
| Independent reflections           | 6855 [R(int) = 0.0353]                      |
| Completeness to theta = 67.50°    | 99.9 %                                      |
| Absorption correction             | Semi-empirical from equivalents             |
| Max. and min. transmission        | 1.00000 and 0.44228                         |
| Refinement method                 | Full-matrix least-squares on F <sup>2</sup> |
| Data / restraints / parameters    | 6855 / 0 / 406                              |
| Goodness-of-fit on F <sup>2</sup> | 1.070                                       |
| Final R indices [I>2sigma(I)]     | R1 = 0.0373, wR2 = 0.0995                   |
| R indices (all data)              | R1 = 0.0381, wR2 = 0.1002                   |
| Largest diff. peak and hole       | 1.436 and -0.819 e.Å <sup>-3</sup>          |

**Table S8.** Crystal data and structure refinement for **4**.

|             |           |
|-------------|-----------|
| Se(1)-Ga(1) | 2.3370(4) |
| Se(1)-Ge(1) | 2.4385(4) |
| Ge(1)-C(1)  | 2.047(2)  |
| Ge(1)-C(5)  | 2.052(3)  |
| Ga(1)-Cl(3) | 2.2041(7) |
| Ga(1)-Cl(1) | 2.2108(7) |
| Ga(1)-Cl(2) | 2.2205(7) |
| N(1)-C(1)   | 1.344(3)  |
| N(1)-C(2)   | 1.386(3)  |
| C(1)-N(2)   | 1.351(3)  |
| N(2)-C(3)   | 1.387(3)  |
| N(2)-C(4)   | 1.451(3)  |
| C(2)-C(3)   | 1.340(4)  |
| N(3)-C(5)   | 1.353(3)  |
| N(3)-C(7)   | 1.381(3)  |
| N(3)-C(4)   | 1.462(3)  |
| N(4)-C(5)   | 1.346(3)  |
| N(4)-C(6)   | 1.387(3)  |
| C(6)-C(7)   | 1.342(4)  |

|                   |             |
|-------------------|-------------|
| Ga(1)-Se(1)-Ge(1) | 110.724(15) |
| C(1)-Ge(1)-C(5)   | 86.07(10)   |
| C(1)-Ge(1)-Se(1)  | 99.62(7)    |
| C(5)-Ge(1)-Se(1)  | 103.79(7)   |
| Cl(3)-Ga(1)-Cl(1) | 106.06(3)   |
| Cl(3)-Ga(1)-Cl(2) | 105.07(3)   |
| Cl(1)-Ga(1)-Cl(2) | 107.69(3)   |
| Cl(3)-Ga(1)-Se(1) | 117.99(2)   |
| Cl(1)-Ga(1)-Se(1) | 112.20(2)   |
| Cl(2)-Ga(1)-Se(1) | 107.22(2)   |
| C(1)-N(1)-C(2)    | 110.4(2)    |
| N(1)-C(1)-N(2)    | 105.3(2)    |
| N(1)-C(1)-Ge(1)   | 124.23(18)  |
| N(2)-C(1)-Ge(1)   | 129.37(18)  |
| C(1)-N(2)-C(3)    | 110.6(2)    |
| C(1)-N(2)-C(4)    | 125.4(2)    |
| C(3)-N(2)-C(4)    | 123.3(2)    |
| C(3)-C(2)-N(1)    | 107.2(2)    |
| C(5)-N(3)-C(7)    | 110.9(2)    |
| C(5)-N(3)-C(4)    | 125.5(2)    |
| C(7)-N(3)-C(4)    | 123.1(2)    |
| C(2)-C(3)-N(2)    | 106.4(2)    |
| C(5)-N(4)-C(6)    | 110.9(2)    |
| N(2)-C(4)-N(3)    | 111.7(2)    |
| N(4)-C(5)-N(3)    | 104.8(2)    |
| N(4)-C(5)-Ge(1)   | 124.62(18)  |
| N(3)-C(5)-Ge(1)   | 128.10(18)  |
| C(7)-C(6)-N(4)    | 106.7(2)    |
| C(6)-C(7)-N(3)    | 106.7(2)    |

---

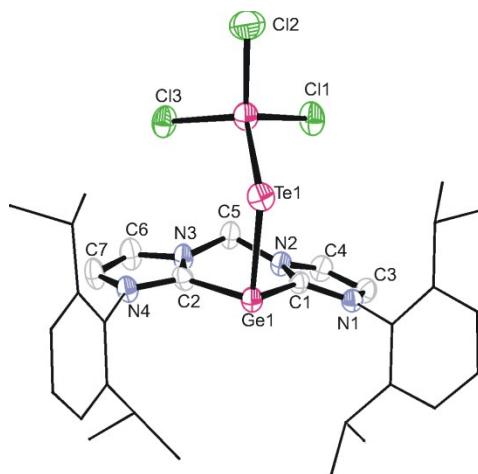

**Figure S 5.** Molecular structure of compound **5**. Thermal ellipsoids are drawn at 50% probability level. H atoms and three lattice solvent THF molecules are omitted for clarity.

**Table S9.** Crystal data and structure refinement for **5**.

|                                 |                                                                                                                         |
|---------------------------------|-------------------------------------------------------------------------------------------------------------------------|
| Empirical formula               | C43 H64 Cl3 Ga Ge N4 O3 Te                                                                                              |
| Formula weight                  | 1061.24                                                                                                                 |
| Temperature                     | 150(2) K                                                                                                                |
| Wavelength                      | 1.54184 Å                                                                                                               |
| Crystal system                  | Triclinic                                                                                                               |
| Space group                     | p-1                                                                                                                     |
| Unit cell dimensions            | a = 11.3788(3) Å      α = 69.253(2)°.<br>b = 13.0772(3) Å      β = 83.744(2)°.<br>c = 17.5125(4) Å      γ = 84.543(2)°. |
| Volume                          | 2417.94(10) Å <sup>3</sup>                                                                                              |
| Z                               | 2                                                                                                                       |
| Density (calculated)            | 1.458 Mg/m <sup>3</sup>                                                                                                 |
| Absorption coefficient          | 7.950 mm <sup>-1</sup>                                                                                                  |
| F(000)                          | 1080                                                                                                                    |
| Crystal size                    | 0.17 x 0.11 x 0.05 mm <sup>3</sup>                                                                                      |
| Theta range for data collection | 2.71 to 67.49°.                                                                                                         |
| Index ranges                    | -9 ≤ h ≤ 13, -15 ≤ k ≤ 15, -20 ≤ l ≤ 20                                                                                 |
| Reflections collected           | 14971                                                                                                                   |



|                                   |                                             |
|-----------------------------------|---------------------------------------------|
| Independent reflections           | 8672 [R(int) = 0.0369]                      |
| Completeness to theta = 67.49°    | 99.4 %                                      |
| Absorption correction             | Semi-empirical from equivalents             |
| Max. and min. transmission        | 1.00000 and 0.31666                         |
| Refinement method                 | Full-matrix least-squares on F <sup>2</sup> |
| Data / restraints / parameters    | 8672 / 88 / 559                             |
| Goodness-of-fit on F <sup>2</sup> | 1.086                                       |
| Final R indices [I>2sigma(I)]     | R1 = 0.0560, wR2 = 0.1475                   |
| R indices (all data)              | R1 = 0.0623, wR2 = 0.1531                   |
| Largest diff. peak and hole       | 2.197 and -1.761 e.Å <sup>-3</sup>          |

**Table S10.** Crystal data and structure refinement for **5**.

|                   |            |
|-------------------|------------|
| Te(1)-Ga(1)       | 2.5262(7)  |
| Te(1)-Ge(1)       | 2.6538(6)  |
| Ge(1)-C(2)        | 2.034(5)   |
| Ge(1)-C(1)        | 2.040(4)   |
| Ga(1)-Cl(2)       | 2.2027(16) |
| Ga(1)-Cl(3)       | 2.2310(13) |
| Ga(1)-Cl(1)       | 2.2379(14) |
| N(1)-C(1)         | 1.350(6)   |
| N(1)-C(3)         | 1.391(6)   |
| C(1)-N(2)         | 1.357(6)   |
| N(2)-C(4)         | 1.380(6)   |
| N(2)-C(5)         | 1.453(6)   |
| C(2)-N(4)         | 1.348(6)   |
| C(2)-N(3)         | 1.353(6)   |
| N(3)-C(6)         | 1.381(6)   |
| N(3)-C(5)         | 1.459(6)   |
| C(3)-C(4)         | 1.347(7)   |
| N(4)-C(7)         | 1.380(6)   |
| C(6)-C(7)         | 1.361(8)   |
| Ga(1)-Te(1)-Ge(1) | 108.95(2)  |
| C(2)-Ge(1)-C(1)   | 86.40(18)  |
| C(2)-Ge(1)-Te(1)  | 97.69(13)  |

|                   |            |
|-------------------|------------|
| C(1)-Ge(1)-Te(1)  | 101.76(12) |
| Cl(2)-Ga(1)-Cl(3) | 105.05(6)  |
| Cl(2)-Ga(1)-Cl(1) | 106.40(7)  |
| Cl(3)-Ga(1)-Cl(1) | 104.24(5)  |
| Cl(2)-Ga(1)-Te(1) | 112.38(5)  |
| Cl(3)-Ga(1)-Te(1) | 115.41(4)  |
| Cl(1)-Ga(1)-Te(1) | 112.54(4)  |
| C(1)-N(1)-C(3)    | 110.2(4)   |
| N(1)-C(1)-N(2)    | 105.4(4)   |
| N(1)-C(1)-Ge(1)   | 124.9(3)   |
| N(2)-C(1)-Ge(1)   | 128.3(3)   |
| C(1)-N(2)-C(4)    | 110.4(4)   |
| C(1)-N(2)-C(5)    | 126.3(4)   |
| C(4)-N(2)-C(5)    | 122.5(4)   |
| N(4)-C(2)-N(3)    | 104.9(4)   |
| N(4)-C(2)-Ge(1)   | 125.6(3)   |
| N(3)-C(2)-Ge(1)   | 129.1(3)   |
| C(2)-N(3)-C(6)    | 111.4(4)   |
| C(2)-N(3)-C(5)    | 126.6(4)   |
| C(6)-N(3)-C(5)    | 121.6(4)   |
| C(4)-C(3)-N(1)    | 106.8(4)   |
| C(2)-N(4)-C(7)    | 110.9(4)   |
| C(3)-C(4)-N(2)    | 107.0(4)   |
| N(2)-C(5)-N(3)    | 112.0(4)   |
| C(7)-C(6)-N(3)    | 105.9(4)   |
| C(6)-C(7)-N(4)    | 106.9(4)   |

---

Symmetry transformations used to generate equivalent atoms:

## C. Computational Details

### C.1. Computational methods

The calculations were performed using Gaussian 09 Rev. D.01<sup>3</sup> and ORCA version 3.0.2.<sup>4</sup> Compounds **1-5** were calculated at B3LYP<sup>5</sup>-D3(BJ)/def2-TZVPP<sup>6</sup> and at ZORA<sup>7</sup>-BP86<sup>5a,8</sup>-D3(BJ)/def2-TZVP(-f)<sup>6</sup>, employing the DFT-D3 empirical dispersion corrections of Grimme (D3)<sup>9</sup> with Becke-Johnson (BJ)<sup>10</sup> damping. Model compounds, where the Dipp substituent on the nitrogen atoms were replaced by R=Ph (e.g., **1'**) as well and model compounds with R=Me (e.g., **1''**) were optimized at B3LYP-D3(BJ)/def2-SV<sup>6</sup>. Solvent effects were calculated by optimizing the geometries in acetonitrile and THF using the Polarizable Continuum Model (PCM).<sup>11</sup> Harmonic frequencies were calculated to characterise the optimised compounds as minima or transition states. Free energies are calculated at 1 atm. and 298.15 K. The calculated optimised geometries of the experimental compounds and of the model compounds (with all three methods used) are in very good agreement with experiment. NBO 6.0<sup>12</sup> was used to calculate the Natural Population Analysis (NPA) charges<sup>13</sup> and Wiberg bond indices (WBI).<sup>14</sup> The resonance structures and their weights were calculated using Natural Resonance Theory (NRT).<sup>15</sup> These properties were calculated using the optimised geometries at B3LYP-D3(BJ)/def2-SV. Resonance structures were calculated for the model compounds with R=Me.

<sup>77</sup>Se and <sup>125</sup>Te chemical shifts were calculated numerically for the experimental compounds **3**, **4** and **5** at ZORA-M06L/def2-TZVP(-f)//ZORA-PB86-D3(BJ)/def2-TVZP(-f) using the IGLO<sup>16</sup> method. The reference compounds are SeMe<sub>2</sub> ( $\sigma$  (<sup>77</sup>Se) = 1726.4 ppm (calc.) (2069 ppm (exp.)<sup>17a,b</sup>) and TeMe<sub>2</sub> ( $\sigma$  (<sup>125</sup>Te)=2829.0 ppm (calc.) 3388 ppm (exp.)<sup>18</sup>).

### C.2. Optimized geometries

**Table S11.** Measured and calculated geometry parameters (bond lengths in Å, bond angles in degrees) for compounds **1-5** (R=Dipp<sup>a</sup>) and calculated values for model compounds **1'-5'** (R=Ph<sup>b</sup>).

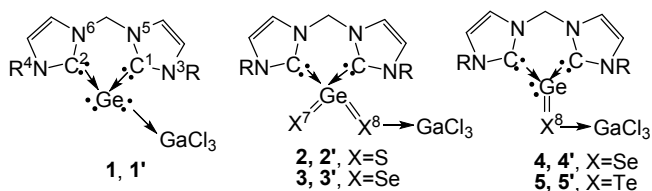

| Parameter                                              |                           | 1<br>R=Dipp,<br>1'(R=Ph) | 2<br>R=Dipp,<br>2'(R=Ph) | 3<br>R=Dipp,<br>3'(R=Ph) | 4<br>R=Dipp,<br>4'(R=Ph) | 5<br>R=Dipp,<br>5'(R=Ph) |
|--------------------------------------------------------|---------------------------|--------------------------|--------------------------|--------------------------|--------------------------|--------------------------|
| r(Ge-Gal)                                              | Exp. R=Dipp               | 2.520                    | -                        | -                        | -                        | -                        |
|                                                        | Calc. R=Dipp              | 2.588                    | -                        | -                        | -                        | -                        |
|                                                        | Calc. R=Ph                | 2.549                    | -                        | -                        | -                        | -                        |
| r(Ge-C1)                                               | Exp. R=Dipp               | 2.043                    | 1.997                    | 1.987                    | 2.025                    | 2.040                    |
|                                                        | Calc. R=Dipp <sup>c</sup> | 2.040                    | 2.089                    | 2.029                    | 2.067                    | 2.058                    |
|                                                        | Calc. R=Ph                | 2.048                    | 2.022                    | 2.020                    | 2.072                    | 2.058                    |
| r(Ge-C2)                                               | Exp. R=Dipp               | 2.033                    | 1.997                    | 1.987                    | 2.047                    | 2.034                    |
|                                                        | Calc. R=Dipp <sup>c</sup> | 2.056                    | 2.089                    | 2.029                    | 2.065                    | 2.059                    |
|                                                        | Calc. R=Ph                | 2.045                    | 2.020                    | 2.020                    | 2.071                    | 2.052                    |
| r(C1-N3)                                               | Exp. R=Dipp               | 1.349                    | 1.329                    | 1.352                    | 1.346                    | 1.350                    |
|                                                        | Calc. R=Dipp <sup>c</sup> | 1.350                    | 1.342                    | 1.344                    | 1.348                    | 1.349                    |
|                                                        | Calc. R=Ph                | 1.356                    | 1.344                    | 1.353                    | 1.357                    | 1.358                    |
| r(C1-N5)                                               | Exp. R=Dipp               | 1.354                    | 1.358                    | 1.366                    | 1.353                    | 1.357                    |
|                                                        | Calc. R=Dipp <sup>c</sup> | 1.355                    | 1.349                    | 1.350                    | 1.352                    | 1.352                    |
|                                                        | Calc. R=Ph                | 1.360                    | 1.354                    | 1.359                    | 1.361                    | 1.362                    |
| r(C2-N4)                                               | Exp. R=Dipp               | 1.348                    | 1.329                    | 1.352                    | 1.344                    | 1.348                    |
|                                                        | Calc. R=Dipp <sup>c</sup> | 1.351                    | 1.342                    | 1.344                    | 1.348                    | 1.349                    |
|                                                        | Calc. R=Ph                | 1.356                    | 1.343                    | 1.353                    | 1.357                    | 1.359                    |
| Exp. R=Dipp<br>Calc. R=Dipp <sup>c</sup><br>Calc. R=Ph | Exp. R=Dipp               | 1.359                    | 1.358                    | 1.359                    | 1.351                    | 1.353                    |
|                                                        | Calc. R=Dipp <sup>c</sup> | 1.354                    | 1.349                    | 1.350                    | 1.352                    | 1.352                    |
|                                                        | Calc. R=Ph                | 1.360                    | 1.354                    | 1.359                    | 1.361                    | 1.363                    |
| r(Ge-X7)                                               | Exp. R=Dipp               | -                        | 2.087                    | 2.214                    | -                        | -                        |
|                                                        | Calc. R=Dipp <sup>c</sup> | -                        | 2.081                    | 2.219                    | -                        | -                        |
|                                                        | Calc. R=Ph                | -                        | 2.091                    | 2.224                    | -                        | -                        |
| r(Ge-X8)                                               | Exp. R=Dipp               | -                        | 2.198                    | 2.326                    | 2.438                    | 2.654                    |
|                                                        | Calc. R=Dipp              | -                        | 2.208                    | 2.347                    | 2.427                    | 2.634                    |
|                                                        | Calc. R=Ph                | -                        | 2.213                    | 2.351                    | 2.438                    | 2.644                    |
| r(X8-Ga)                                               | Exp. R=Dipp               | -                        | 2.249                    | 2.374                    | 2.337                    | 2.526                    |
|                                                        | Calc. R=Dipp              | -                        | 2.275                    | 2.403                    | 2.388                    | 2.587                    |
|                                                        | Calc. R=Ph                | -                        | 2.280                    | 2.397                    | 2.381                    | 2.587                    |
| ∠C1-Ge-C2)                                             | Exp. R=Dipp               | 85.7                     | 91.3                     | 91.8                     | 86.1                     | 86.4                     |
|                                                        | Calc. R=Dipp              | 84.5                     | 88.6                     | 89.2                     | 85.1                     | 85.6                     |
|                                                        | Calc. R=Ph                | 85.4                     | 89.2                     | 89.3                     | 84.4                     | 84.9                     |
| ∠X7-Ge-X8)                                             | Exp. R=Dipp               | -                        | 115.3                    | 115.2                    | -                        | -                        |
|                                                        | Calc. R=Dipp <sup>c</sup> | -                        | 120.3                    | 119.4                    | -                        | -                        |
|                                                        | Calc. R=Ph                | -                        | 125.6                    | 119.4                    | -                        | -                        |
| ∠Ge-X8-Ga)                                             | Exp. R=Dipp               | -                        | 107.9                    | 104.8                    | 110.7                    | 109.0                    |
|                                                        | Calc. R=Dipp <sup>c</sup> | -                        | 109.2                    | 105.8                    | 110.4                    | 105.2                    |
|                                                        | Calc. R=Ph                | -                        | 102.5                    | 104.0                    | 109.5                    | 104.4                    |
|                                                        |                           |                          |                          | 98.7                     | 104.6                    | 99.9                     |

<sup>a</sup> Optimised at B3LYP-D3(BJ)/def2-TZVPP; <sup>b</sup> Optimised at B3LYP-D3(BJ)/def2-SV; <sup>c</sup> In italics, optimised geometries at ZORA-BP86-D3(BJ)/def2-TVZP(-f)

**Table S12.** Optimised<sup>a,b</sup> geometry parameters (bond lengths in Å, bond angles in degrees) of the stationary points on the GaCl<sub>3</sub> migration path from **C**→**D**<sup>c</sup>

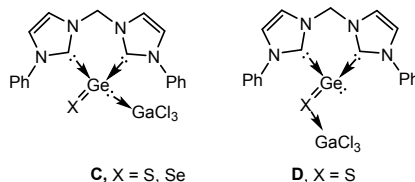

| Parameter  | <b>C(S)</b>        | <b>C(Se)</b>       | <b>D(X=S)</b> | <b>TS1</b><br>C(S)→INT(S) | <b>TS1</b><br>C(Se)→INT(Se) | <b>INT(S)</b> | <b>INT(Se)</b> | <b>TS2 (S)</b> | <b>TS2 (Se)</b> |
|------------|--------------------|--------------------|---------------|---------------------------|-----------------------------|---------------|----------------|----------------|-----------------|
| r(Ge-Gal)  | 2.479              | 2.480              | -             | 2.547                     | 2.566                       | -             | -              | -              | -               |
| r(Ge-C1)   | 2.062              | 2.063              | 2.082         | 2.023                     | 2.017                       | 2.105         | 2.102          | 1.890          | 1.886           |
| r(Ge-C2)   | 2.068              | 2.063              | 2.082         | 2.023                     | 2.016                       | 2.111         | 2.105          | 1.883          | 1.894           |
| r(C1-N3)   | 1.344              | 1.346              | 1.352         | 1.352                     | 1.353                       | 1.353         | 1.354          | 1.371          | 1.375           |
| r(C1-N5)   | 1.353              | 1.353              | 1.358         | 1.360                     | 1.361                       | 1.359         | 1.359          | 1.380          | 1.386           |
| r(C2-N4)   | 1.346              | 1.346              | 1.352         | 1.356                     | 1.356                       | 1.356         | 1.357          | 1.376          | 1.371           |
| r(C2-N6)   | 1.354              | 1.353              | 1.358         | 1.363                     | 1.364                       | 1.361         | 1.361          | 1.386          | 1.380           |
| r(Ge-X7)   | 2.100              | 2.238              | -             | 2.143                     | 2.281                       | -             | -              | -              | -               |
| r(Ge-X8)   | -                  | -                  | 2.300         | -                         | -                           | 2.263         | 2.402          | 2.149          | 2.275           |
| r(X8-Ga)   | -                  | -                  | 2.259         | 2.990                     | 3.080                       | 2.292         | 2.418          | 2.341          | 2.463           |
| ∠C1-Ge-C2) | 85.9               | 86.3               | 85.0          | 86.7                      | 87.3                        | 81.9          | 82.6           | 98.2           | 97.8            |
| ∠Ge-X8-Ga) | -                  | -                  | 108.1         | -                         | -                           | 95.4          | 92.5           | 100.2          | 96.5            |
| ∠X-Ge-Ga   | 143.0 <sup>d</sup> | 143.2 <sup>d</sup> | -             | 78.7 <sup>d</sup>         | 78.7 <sup>d</sup>           | -             | -              | -              | -               |

<sup>a</sup> Optimised at B3LYP-D3(BJ)/def2-SV; <sup>b</sup> For atom numbering see Table S11; <sup>c</sup> See Figure S7 for the reaction path and for a schematic presentation of the optimised structures.

### C.3. Charge distribution

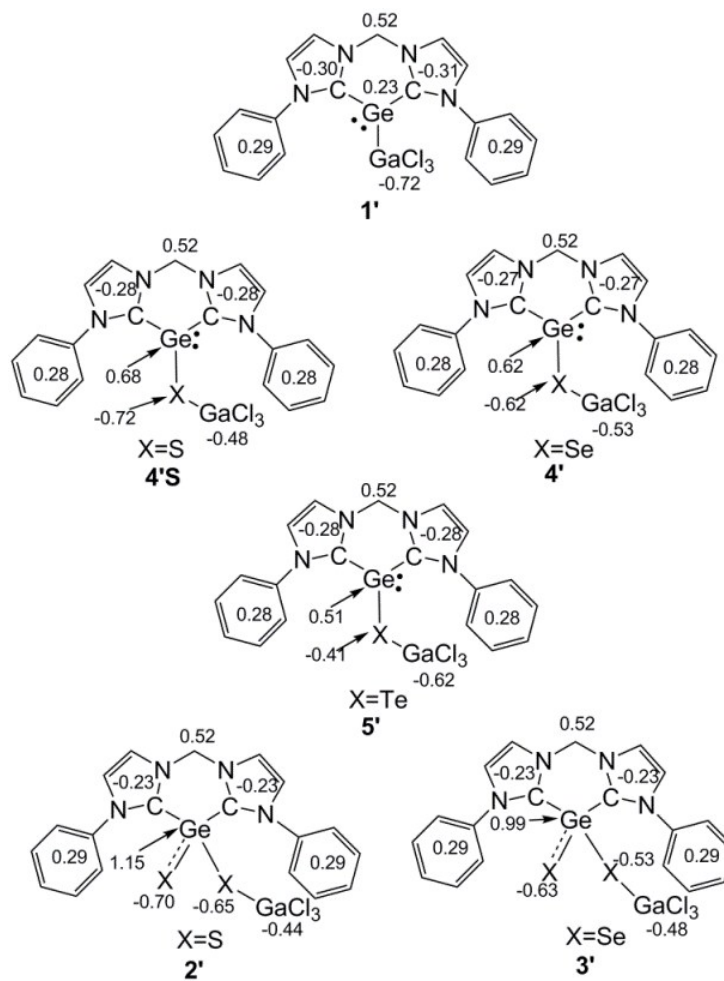

**Figure S6.** Calculated NPA charge distributions (at B3LYP-D3(BJ)/def2-SV) in compounds 1'-5' and in the sulphur analog of 4'(X=S).

### C.4. Reaction free energies

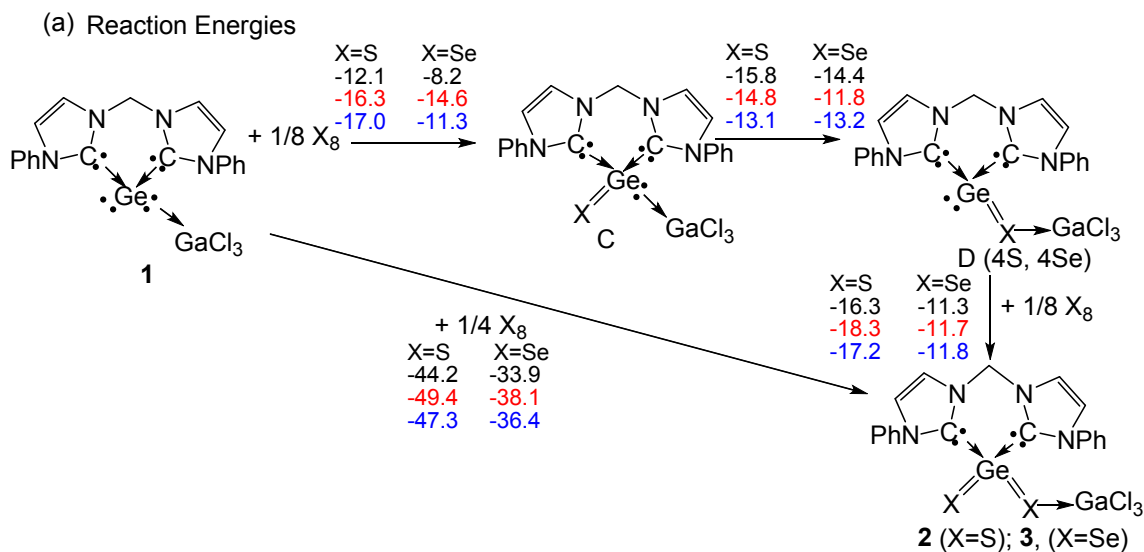

(b) Reaction profile C → D

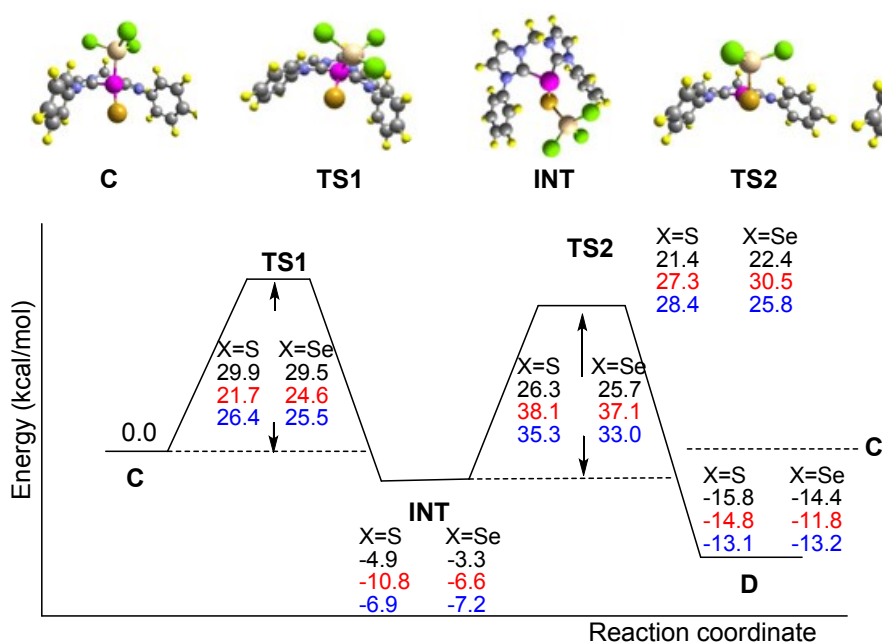

**Figure S7.** (a) Calculated free energies for the formation of **2**, **3** and **4** from **1**. (b) Reaction Profile for the migration of GaCl<sub>3</sub> from C to D (X=S and Se). Gas phase (black), acetonitrile (red), THF (blue).

## C.5. Resonance structures: NRT results

2''

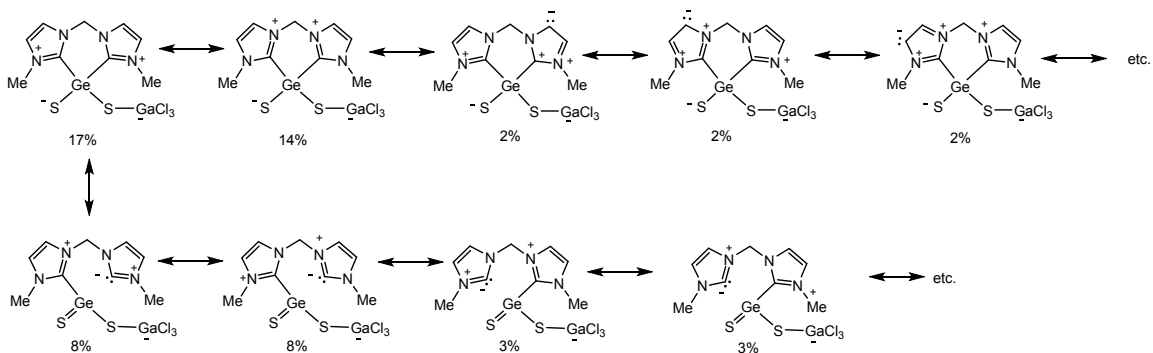

3''

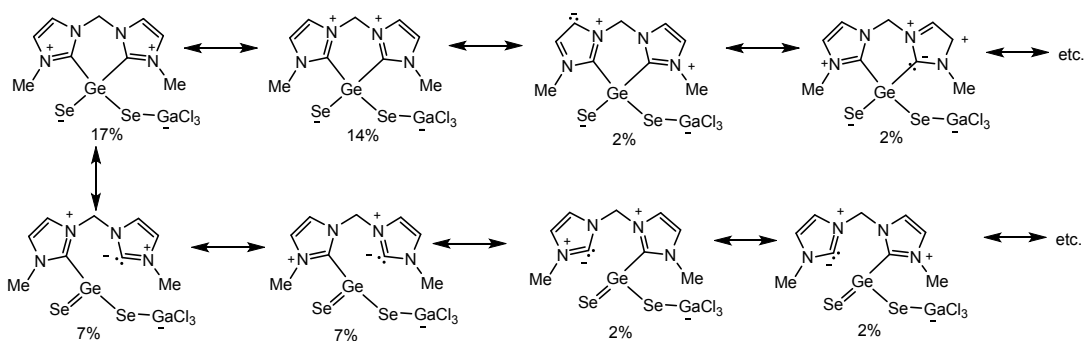

4''

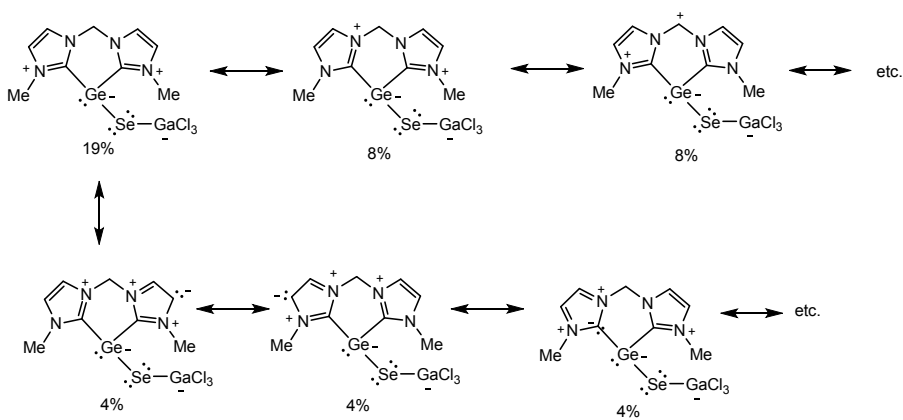

5''



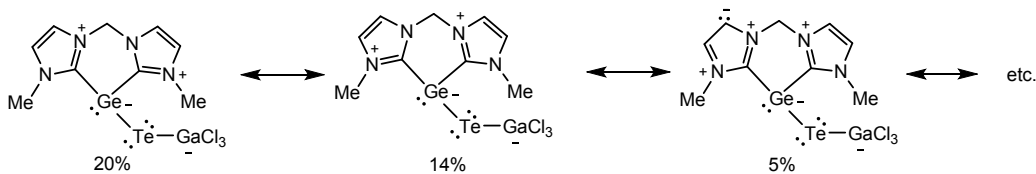

**Scheme S1.** Leading resonance structures (RS) for **2''**, **3''** and **4''** calculated using the NRT method at B3LYP-D3(BJ)/def2-SV and of **5''** calculated at B3LYP-D3(BJ)/def2-SV (SDD for Te). The percentage represents their weight. Smaller weight permutations exist.

### C.6. NMR calculations of $^{77}\text{Se}$ chemical shifts in compounds **3** and **4** and $^{125}\text{Te}$ chemical shift in compound **5**.

**Table S13.** Calculated<sup>a</sup>  $^{77}\text{Se}$  chemical shifts in **3** (R=Dipp), **4** (R=Dipp) and  $^{125}\text{Te}$  chemical shift in **5** (R=Dipp).

|                           | <b>3</b>                                  | <b>4</b>                                  | <b>5</b>                                     |
|---------------------------|-------------------------------------------|-------------------------------------------|----------------------------------------------|
| $\delta(^{77}\text{Se}7)$ | -400.8 <sup>a</sup> ; -308.4 <sup>b</sup> | -                                         | -                                            |
| $\delta(^{77}\text{Se}8)$ | -308.4 <sup>a</sup> ; -223.5 <sup>b</sup> | -515.0 <sup>a</sup> ; -515.0 <sup>b</sup> | -                                            |
| $\delta(^{125}\text{Te})$ | -                                         | -                                         | -1055.5 <sup>a</sup><br>-1042.9 <sup>b</sup> |

<sup>a</sup> Chemical shifts in ppm, calculated at ZORA-MO6L/def2-TZVP(-f)//ZORA-BP86-D3(BJ)/def2-TZVP(-f).  $\text{SeMe}_2$  and  $\text{TeMe}_2$  are used as reference compounds.  $\sigma(^{77}\text{SeMe}_2)=1726.4$  ppm (exp. 2069 ppm ref.17 a,b),  $\sigma(^{125}\text{TeMe}_2)=2829.0$  (exp. 3388 ppm ref.18); Atom numbering according to the numbering in Table S11; <sup>b</sup> Geometry optimized at B3LYP-D3(BJ)/def2-TZVPP.

#### C.6.1. Choosing the computational method for the NMR calculations

##### $^{77}\text{Se}$ NMR

The  $^{77}\text{Se}$  NMR chemical shifts in a variety of organic  $^{77}\text{Se}$  compounds containing Se (**6-19**) covering a broad range of chemical shifts was calculated using 4 different density functionals i.e. M06, B3LYP, PBE0 and B97 using ZORA with the def2-TZVP(-f) basis set. Their geometry was optimized at ZORA-BP86-D3(BJ)/def2-TZVP(-f).  $\text{SeMe}_2$  was used as the reference compound. The experimental<sup>17</sup> and calculated NMR chemical shifts are given in the Table below along with linear correlation charts. All functionals give good correlations between experiment and theory; however, M06L yields the best result in terms of the slope  $\rightarrow 1$ . We therefore, choose M06L as the method for calculating  $^{77}\text{Se}$  NMR isotropic shifts.

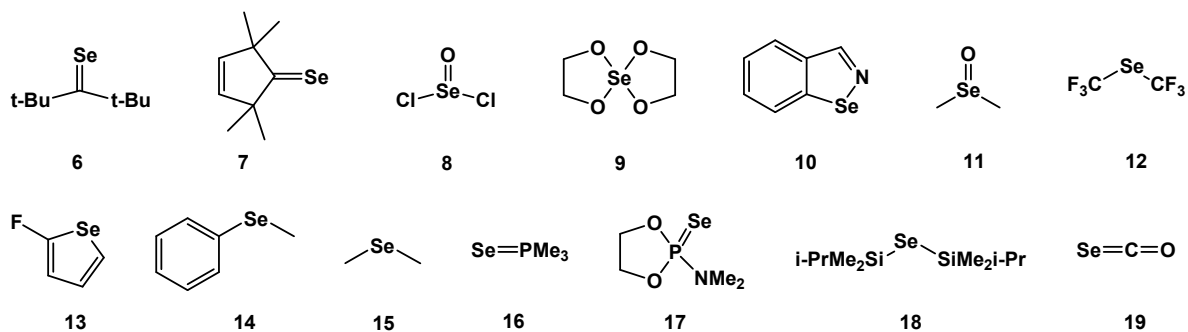

| Compound | $\delta(^{77}\text{Se})$ exp. | $\delta(^{77}\text{Se})$ calc. M06L | $\delta(^{77}\text{Se})$ calc. B3LYP | $\delta(^{77}\text{Se})$ calc. PBE0 | $\delta(^{77}\text{Se})$ calc. B97 |
|----------|-------------------------------|-------------------------------------|--------------------------------------|-------------------------------------|------------------------------------|
| 6        | 2131                          | 1886.2                              | 2501.1                               | 2465.5                              | 2442.1                             |
| 7        | 1803                          | 1526.7                              | 2034.1                               | 2030.6                              | 1996.5                             |
| 8        | 1483                          | 1379.1                              | 1624.2                               | 1617.2                              | 1604.1                             |
| 9        | 1261                          | 1211.5                              | 1370.4                               | 1371.6                              | 1366.9                             |
| 10       | 1013                          | 887.9                               | 1085.1                               | 1100.9                              | 1080.7                             |
| 11       | 812                           | 719                                 | 792.1                                | 803.8                               | 796.4                              |
| 12       | 717                           | 588.5                               | 792                                  | 761.3                               | 761                                |
| 13       | 513                           | 389.8                               | 491.6                                | 519.4                               | 496.9                              |
| 14       | 202                           | 185.6                               | 239.7                                | 238                                 | 238.5                              |
| 15       | 0                             | 0                                   | 0                                    | 0                                   | 0                                  |
| 16       | -235                          | -483.6                              | -399.6                               | -377.5                              | -395.6                             |
| 17       | -317                          | -437.8                              | -368.4                               | -337.3                              | -359.1                             |
| 18       | -419                          | -688.4                              | -675.6                               | -634                                | -669.1                             |
| 19       | -447                          | -616.5                              | -616.5                               | -547.9                              | -585.3                             |

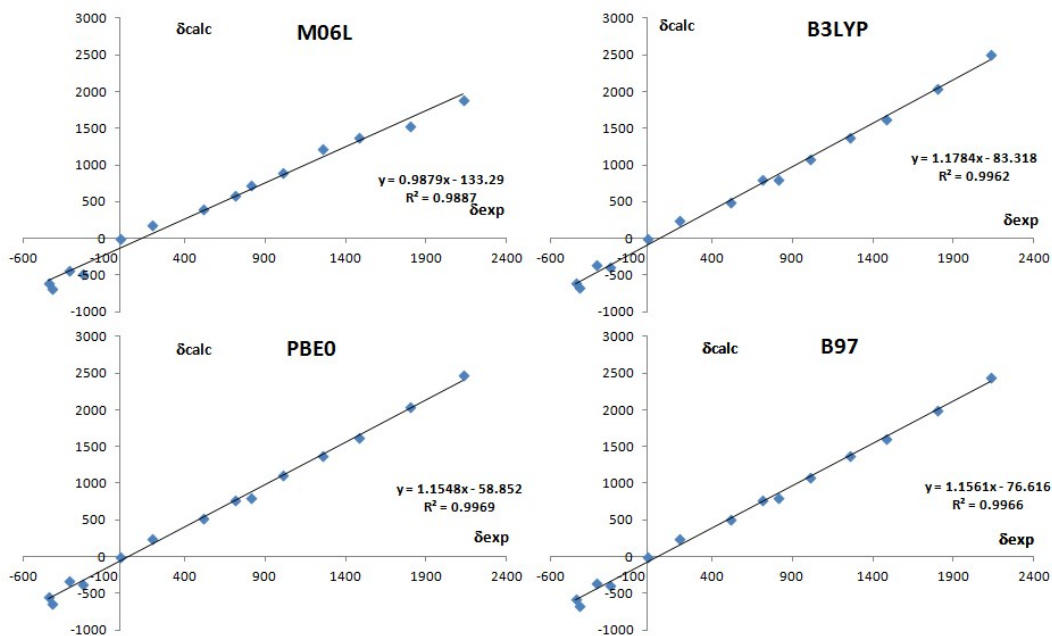

### <sup>125</sup>Te NMR

Similarly we calculated the <sup>125</sup>Te chemical shifts for the fourteen compounds (**20-33**) given below. The reference compound is TeMe<sub>2</sub>. The experimental<sup>18</sup> and calculated NMR chemical shift are given in the table below along with linear correlation charts. The best performing functional in terms of the correlation coefficient R<sup>2</sup> and slope → 1 is M06L.

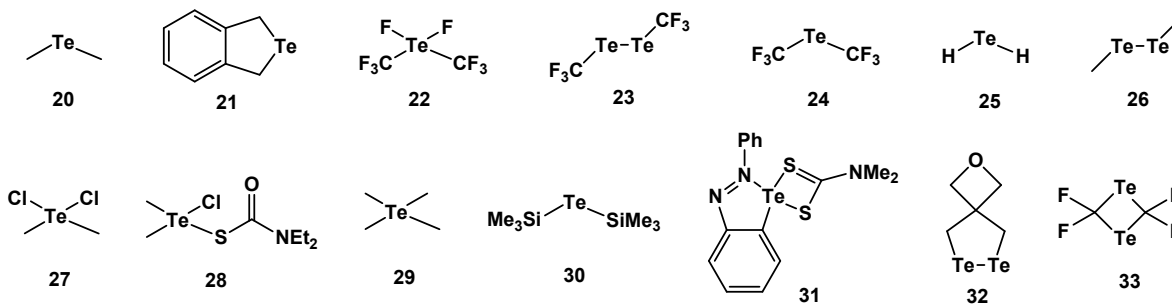

| Compound  | $\delta(^{125}\text{Te})$ exp | $\delta(^{125}\text{Te})$ calc M06L | $\delta(^{125}\text{Te})$ calc B3LYP | $\delta(^{125}\text{Te})$ calc PBE0 | $\delta(^{125}\text{Te})$ calc B97 |
|-----------|-------------------------------|-------------------------------------|--------------------------------------|-------------------------------------|------------------------------------|
| <b>20</b> | 0                             | 0                                   | 0                                    | 0                                   | 0                                  |
| <b>21</b> | 268                           | 124.9                               | 187.7                                | 206.5                               | 195.1                              |
| <b>22</b> | 1187                          | 790.9                               | 895.2                                | 943                                 | 927.9                              |

|           |        |         |         |         |         |
|-----------|--------|---------|---------|---------|---------|
| <b>23</b> | 686    | 624.1   | 1003.6  | 915.6   | 940.7   |
| <b>24</b> | 1368   | 1170.3  | 1523    | 1452.4  | 1459.7  |
| <b>25</b> | -621   | -721.2  | -657    | -603.9  | -627.1  |
| <b>26</b> | 63     | 59.3    | 272.4   | 225.2   | 243.3   |
| <b>27</b> | 733.8  | 414.5   | 361.1   | 403     | 387.6   |
| <b>28</b> | 554.1  | 477.5   | 436.5   | 467.2   | 463.4   |
| <b>29</b> | -67    | -260.3  | -382.9  | -327.2  | -346.3  |
| <b>30</b> | -842   | -1292.3 | -1291.9 | -1220.3 | -1279.8 |
| <b>31</b> | 1228.6 | 924.7   | 1201.8  | 1259.7  | 1213    |
| <b>32</b> | 57.1   | 46.9    | 271.3   | 239.7   | 248.4   |
| <b>33</b> | 2321.7 | 2374.7  | 2828.5  | 2734.4  | 2762.2  |

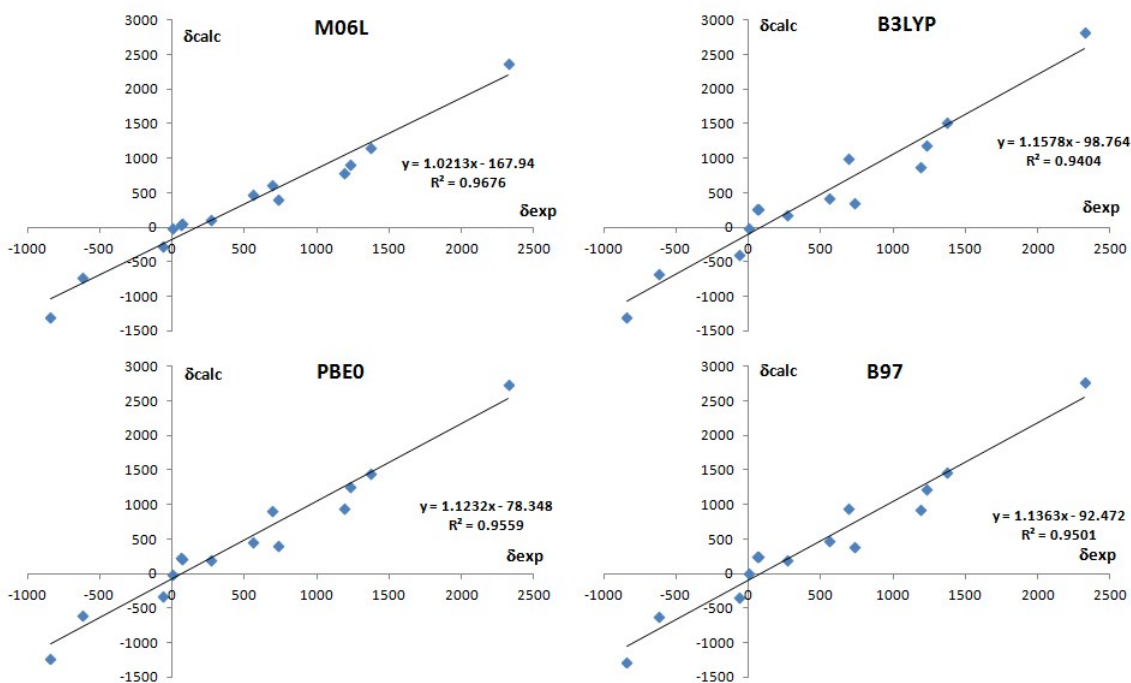

## C.6. Calculated molecular xyz coordinates; energies in Hartrees, free energies at 298.15K

a) 1-5 (R=Dipp). B3LYP-D3(BJ)/def2-TZVPP

1

E= -6807.9874529

Free energy = -6807.407136

|    |              |              |              |   |              |              |              |
|----|--------------|--------------|--------------|---|--------------|--------------|--------------|
| 32 | -0.017403000 | 0.103375000  | -0.482055000 | 1 | 5.015402000  | 3.894240000  | 0.956190000  |
| 31 | -0.222527000 | -2.448101000 | -0.079156000 | 6 | 3.735700000  | -1.660682000 | -0.814063000 |
| 17 | -0.325208000 | -3.624959000 | -1.955230000 | 1 | 3.001927000  | -1.758462000 | -0.020285000 |
| 7  | 2.713002000  | 0.416650000  | 0.895899000  | 6 | 5.042825000  | -2.269962000 | -0.291507000 |
| 6  | 1.387267000  | 0.165222000  | 1.018232000  | 1 | 5.815886000  | -2.263137000 | -1.062243000 |
| 17 | 1.453598000  | -3.302390000 | 1.215768000  | 1 | 4.872921000  | -3.302134000 | 0.014879000  |
| 7  | 1.203292000  | -0.094354000 | 2.334661000  | 1 | 5.424186000  | -1.719964000 | 0.570416000  |
| 6  | -1.383470000 | 0.306712000  | 1.037362000  | 6 | 3.199022000  | -2.450030000 | -2.011921000 |
| 17 | -2.041632000 | -2.955219000 | 1.200159000  | 1 | 2.320484000  | -1.972387000 | -2.443376000 |
| 7  | -1.192010000 | 0.063034000  | 2.355822000  | 1 | 2.902073000  | -3.447201000 | -1.691918000 |
| 6  | 3.352979000  | 0.258222000  | 2.116476000  | 1 | 3.949416000  | -2.552065000 | -2.797889000 |
| 1  | 4.411892000  | 0.392011000  | 2.220306000  | 6 | -3.290328000 | 1.280819000  | -0.234495000 |
| 7  | -2.664204000 | 0.734817000  | 0.946302000  | 6 | -4.104500000 | 0.447021000  | -1.002933000 |
| 6  | 2.404768000  | -0.058943000 | 3.022027000  | 6 | -4.682029000 | 0.994880000  | -2.148957000 |
| 1  | 2.476711000  | -0.280904000 | 4.070211000  | 1 | -5.318870000 | 0.376128000  | -2.764731000 |
| 6  | -0.030473000 | -0.621946000 | 2.883177000  | 6 | -4.435297000 | 2.303956000  | -2.517492000 |
| 1  | -0.099483000 | -1.683558000 | 2.640521000  | 1 | -4.882600000 | 2.705441000  | -3.416958000 |
| 1  | -0.013619000 | -0.491997000 | 3.961483000  | 6 | -3.606580000 | 3.103979000  | -1.743722000 |
| 6  | -2.347063000 | 0.304794000  | 3.081100000  | 1 | -3.405896000 | 4.117041000  | -2.059418000 |
| 1  | -2.408937000 | 0.136068000  | 4.139780000  | 6 | -3.021504000 | 2.615999000  | -0.580252000 |
| 6  | -3.269962000 | 0.732242000  | 2.195259000  | 6 | -2.124922000 | 3.502466000  | 0.262654000  |
| 1  | -4.290130000 | 1.037969000  | 2.326172000  | 1 | -1.416910000 | 2.858087000  | 0.780913000  |
| 6  | 3.383809000  | 0.813812000  | -0.321352000 | 6 | -1.292809000 | 4.472992000  | -0.571790000 |
| 6  | 3.913642000  | -0.193210000 | -1.131714000 | 1 | -0.722898000 | 3.935835000  | -1.329057000 |
| 6  | 4.613615000  | 0.199445000  | -2.272145000 | 1 | -0.589995000 | 4.999792000  | 0.070570000  |
| 1  | 5.034543000  | -0.558196000 | -2.917164000 | 1 | -1.907745000 | 5.218937000  | -1.075785000 |
| 6  | 4.761480000  | 1.535925000  | -2.591851000 | 6 | -2.946313000 | 4.253609000  | 1.322220000  |
| 1  | 5.293349000  | 1.821627000  | -3.489495000 | 1 | -3.760625000 | 4.808477000  | 0.853919000  |
| 6  | 4.224026000  | 2.515941000  | -1.769808000 | 1 | -2.318582000 | 4.960666000  | 1.866458000  |
| 1  | 4.346922000  | 3.553788000  | -2.039928000 | 1 | -3.385907000 | 3.567663000  | 2.045701000  |
| 6  | 3.533400000  | 2.183517000  | -0.608118000 | 6 | -4.349139000 | -1.005710000 | -0.656767000 |
| 6  | 3.033955000  | 3.273127000  | 0.324809000  | 1 | -3.873100000 | -1.222360000 | 0.296603000  |
| 1  | 2.128013000  | 2.907441000  | 0.810798000  | 6 | -5.841945000 | -1.315437000 | -0.502329000 |
| 6  | 2.676237000  | 4.567053000  | -0.408697000 | 1 | -6.304419000 | -0.684155000 | 0.258365000  |
| 1  | 2.194961000  | 5.260767000  | 0.280132000  | 1 | -5.973330000 | -2.356636000 | -0.207063000 |
| 1  | 1.998800000  | 4.384639000  | -1.239734000 | 1 | -6.385279000 | -1.163378000 | -1.435996000 |
| 1  | 3.565458000  | 5.065483000  | -0.796020000 | 6 | -3.699836000 | -1.917581000 | -1.705127000 |
| 6  | 4.074610000  | 3.584254000  | 1.413473000  | 1 | -4.217258000 | -1.841335000 | -2.663458000 |
| 1  | 4.275897000  | 2.726647000  | 2.049604000  | 1 | -3.729998000 | -2.954385000 | -1.375428000 |
| 1  | 3.724459000  | 4.397318000  | 2.051598000  | 1 | -2.654922000 | -1.662978000 | -1.870209000 |

2

E= -7604.5278382

Free energy = -7603.947719

|    |              |              |              |    |              |              |              |
|----|--------------|--------------|--------------|----|--------------|--------------|--------------|
| 32 | -0.000070000 | 0.410736000  | -0.409448000 | 6  | 4.965351000  | -1.772346000 | -0.164987000 |
| 31 | 0.000500000  | -3.214619000 | 0.060277000  | 1  | 4.845416000  | -2.835074000 | 0.044458000  |
| 17 | -1.766614000 | -3.107862000 | 1.443126000  | 1  | 5.079462000  | -1.257519000 | 0.789398000  |
| 16 | -0.000364000 | 2.192517000  | -1.485340000 | 1  | 5.885499000  | -1.631043000 | -0.734962000 |
| 7  | 1.207792000  | 0.032127000  | 2.334050000  | 17 | 1.767525000  | -3.107328000 | 1.443196000  |
| 6  | 1.421420000  | 0.333891000  | 1.036236000  | 7  | -1.207848000 | 0.031794000  | 2.334038000  |
| 17 | 0.000782000  | -5.096849000 | -1.043836000 | 6  | -1.421555000 | 0.333480000  | 1.036217000  |
| 16 | 0.000305000  | -1.527543000 | -1.466862000 | 7  | -2.719131000 | 0.665444000  | 0.945048000  |
| 7  | 2.718907000  | 0.666196000  | 0.945072000  | 6  | -3.333694000 | 0.534094000  | 2.175549000  |
| 6  | 3.333514000  | 0.534957000  | 2.175563000  | 1  | -4.377123000 | 0.743591000  | 2.307692000  |
| 1  | 4.376899000  | 0.744675000  | 2.307701000  | 6  | -2.386126000 | 0.131323000  | 3.052034000  |
| 6  | 2.386040000  | 0.131974000  | 3.052052000  | 1  | -2.444250000 | -0.105453000 | 4.097659000  |
| 1  | 2.444227000  | -0.104808000 | 4.097672000  | 6  | -3.377174000 | 1.164063000  | -0.245013000 |
| 6  | 0.000051000  | -0.564244000 | 2.876055000  | 6  | -3.864002000 | 0.239744000  | -1.175102000 |
| 1  | 0.000197000  | -1.632365000 | 2.663013000  | 6  | -4.633106000 | 2.126730000  | -2.478636000 |
| 1  | 0.000024000  | -0.405010000 | 3.950329000  | 1  | -5.122142000 | 2.507092000  | -3.365403000 |
| 6  | 3.376821000  | 1.164938000  | -0.245008000 | 6  | -4.496755000 | 0.759206000  | -2.302248000 |
| 6  | 3.863987000  | 0.240677000  | -1.174971000 | 1  | -4.879023000 | 0.083093000  | -3.051946000 |
| 6  | 4.632505000  | 2.127761000  | -2.478702000 | 6  | -4.136717000 | 3.011786000  | -1.534775000 |
| 1  | 5.121443000  | 2.508181000  | -3.365499000 | 1  | -4.235551000 | 4.074837000  | -1.696985000 |
| 6  | 4.496621000  | 0.760213000  | -2.302150000 | 6  | -3.488633000 | 2.550610000  | -0.393389000 |
| 1  | 4.879148000  | 0.084136000  | -3.051749000 | 6  | -2.959281000 | 3.525288000  | 0.642367000  |
| 6  | 4.135767000  | 3.012764000  | -1.534973000 | 1  | -2.213682000 | 3.004775000  | 1.243683000  |
| 1  | 4.234237000  | 4.075828000  | -1.697317000 | 6  | -4.090137000 | 3.984510000  | 1.575355000  |
| 6  | 3.487815000  | 2.551509000  | -0.393545000 | 1  | -4.579817000 | 3.144397000  | 2.067894000  |
| 6  | 2.958105000  | 3.526139000  | 0.642076000  | 1  | -3.702879000 | 4.651547000  | 2.347202000  |
| 1  | 2.212658000  | 3.005456000  | 1.243433000  | 1  | -4.852022000 | 4.525596000  | 1.012376000  |
| 6  | 4.088782000  | 3.985868000  | 1.575033000  | 6  | -2.253336000 | 4.731984000  | 0.018604000  |
| 1  | 4.578749000  | 3.145991000  | 2.067685000  | 1  | -2.951442000 | 5.374045000  | -0.519729000 |
| 1  | 3.701274000  | 4.652862000  | 2.346792000  | 1  | -1.795731000 | 5.336138000  | 0.803384000  |
| 1  | 4.850487000  | 4.527156000  | 1.012003000  | 1  | -1.473446000 | 4.403831000  | -0.664846000 |
| 6  | 2.251777000  | 4.732522000  | 0.018147000  | 6  | -3.753057000 | -1.254595000 | -0.952817000 |
| 1  | 2.949680000  | 5.374750000  | -0.520249000 | 1  | -2.872253000 | -1.443100000 | -0.345878000 |
| 1  | 1.793955000  | 5.336620000  | 0.802843000  | 6  | -3.568990000 | -2.050184000 | -2.245102000 |
| 1  | 1.472009000  | 4.404026000  | -0.665279000 | 1  | -4.474895000 | -2.057117000 | -2.853609000 |
| 6  | 3.753522000  | -1.253666000 | -0.952508000 | 1  | -2.749055000 | -1.651191000 | -2.838821000 |
| 1  | 2.872687000  | -1.442394000 | -0.345682000 | 1  | -3.329262000 | -3.084584000 | -2.000072000 |
| 6  | 3.569941000  | -2.049485000 | -2.244724000 | 6  | -4.964833000 | -1.773809000 | -0.165564000 |
| 1  | 4.475947000  | -2.056186000 | -2.853083000 | 1  | -4.844571000 | -2.836528000 | 0.043732000  |
| 1  | 2.749967000  | -1.650848000 | -2.838627000 | 1  | -5.079259000 | -1.259178000 | 0.788888000  |
| 1  | 3.330526000  | -3.083937000 | -1.999601000 | 1  | -5.884943000 | -1.632723000 | -0.735655000 |

3

E = -11611.2798373

Free energy = -11610.699268

|    |              |              |             |   |              |             |             |
|----|--------------|--------------|-------------|---|--------------|-------------|-------------|
| 34 | -2.370135000 | -1.391234000 | 0.000000000 | 6 | -0.436760000 | 2.293841000 | 3.341068000 |
| 32 | -0.442571000 | -0.290351000 | 0.000000000 | 1 | -0.621390000 | 2.432207000 | 4.388025000 |
| 31 | 3.320589000  | 0.154262000  | 0.000000000 | 6 | -0.019861000 | 3.155762000 | 2.387538000 |
| 17 | 3.179048000  | 1.530794000  | 1.771686000 | 1 | 0.256500000  | 4.191786000 | 2.441608000 |
| 6  | -0.309566000 | 1.148171000  | 1.425060000 | 6 | 0.641447000  | 2.962271000 | 0.000000000 |
| 17 | 5.233173000  | -0.901959000 | 0.000000000 | 1 | 0.504976000  | 4.039798000 | 0.000000000 |

|    |              |              |              |   |              |              |              |
|----|--------------|--------------|--------------|---|--------------|--------------|--------------|
| 1  | 1.705251000  | 2.728496000  | 0.000000000  | 6 | -0.436760000 | 2.293841000  | -3.341068000 |
| 6  | -1.140158000 | -0.101539000 | 3.408959000  | 1 | -0.621390000 | 2.432207000  | -4.388025000 |
| 6  | -0.229843000 | -1.043928000 | 3.899425000  | 6 | -0.019861000 | 3.155762000  | -2.387538000 |
| 6  | -2.135133000 | -2.297137000 | 4.706465000  | 1 | 0.256500000  | 4.191786000  | -2.441608000 |
| 1  | -2.528499000 | -3.170293000 | 5.209476000  | 6 | -1.140158000 | -0.101539000 | -3.408959000 |
| 7  | 0.035131000  | 2.435259000  | 1.208238000  | 6 | -0.229843000 | -1.043928000 | -3.899425000 |
| 6  | -3.005501000 | -1.337623000 | 4.214331000  | 6 | -2.135133000 | -2.297137000 | -4.706465000 |
| 1  | -4.069956000 | -1.473964000 | 4.332050000  | 1 | -2.528499000 | -3.170293000 | -5.209476000 |
| 6  | -2.528375000 | -0.213665000 | 3.547903000  | 7 | 0.035131000  | 2.435259000  | -1.208238000 |
| 6  | -3.484762000 | 0.848230000  | 3.035965000  | 6 | -3.005501000 | -1.337623000 | -4.214331000 |
| 1  | -2.983166000 | 1.390301000  | 2.233524000  | 1 | -4.069956000 | -1.473964000 | -4.332050000 |
| 6  | -3.828446000 | 1.846148000  | 4.153234000  | 6 | -2.528375000 | -0.213665000 | -3.547903000 |
| 1  | -4.350869000 | 1.339510000  | 4.966095000  | 6 | -3.484762000 | 0.848230000  | -3.035965000 |
| 1  | -4.479358000 | 2.635113000  | 3.773369000  | 1 | -2.983166000 | 1.390301000  | -2.233524000 |
| 1  | -2.940581000 | 2.315240000  | 4.575412000  | 6 | -3.828446000 | 1.846148000  | -4.153234000 |
| 7  | -0.622082000 | 1.068515000  | 2.729918000  | 1 | -4.350869000 | 1.339510000  | -4.966095000 |
| 6  | -4.768294000 | 0.266126000  | 2.439544000  | 1 | -4.479358000 | 2.635113000  | -3.773369000 |
| 1  | -4.534773000 | -0.468692000 | 1.672905000  | 1 | -2.940581000 | 2.315240000  | -4.575412000 |
| 1  | -5.356051000 | 1.064864000  | 1.985047000  | 7 | -0.622082000 | 1.068515000  | -2.729918000 |
| 1  | -5.391841000 | -0.200359000 | 3.203120000  | 6 | -4.768294000 | 0.266126000  | -2.439544000 |
| 6  | 1.268579000  | -0.851951000 | 3.777767000  | 1 | -4.534773000 | -0.468692000 | -1.672905000 |
| 1  | 1.466629000  | -0.286073000 | 2.871430000  | 1 | -5.356051000 | 1.064864000  | -1.985047000 |
| 6  | 1.805500000  | -0.026487000 | 4.956361000  | 1 | -5.391841000 | -0.200359000 | -3.203120000 |
| 1  | 1.318175000  | 0.945677000  | 5.028165000  | 6 | 1.268579000  | -0.851951000 | -3.777767000 |
| 1  | 2.873490000  | 0.149402000  | 4.830053000  | 1 | 1.466629000  | -0.286073000 | -2.871430000 |
| 1  | 1.647636000  | -0.552648000 | 5.899540000  | 6 | 1.805500000  | -0.026487000 | -4.956361000 |
| 6  | 2.041556000  | -2.164791000 | 3.652064000  | 1 | 1.318175000  | 0.945677000  | -5.028165000 |
| 1  | 2.043394000  | -2.727124000 | 4.587292000  | 1 | 2.873490000  | 0.149402000  | -4.830053000 |
| 1  | 3.078327000  | -1.949205000 | 3.395382000  | 1 | 1.647636000  | -0.552648000 | -5.899540000 |
| 1  | 1.627891000  | -2.792077000 | 2.865082000  | 6 | 2.041556000  | -2.164791000 | -3.652064000 |
| 34 | 1.572209000  | -1.493810000 | 0.000000000  | 1 | 2.043394000  | -2.727124000 | -4.587292000 |
| 6  | -0.766119000 | -2.152159000 | 4.551703000  | 1 | 3.078327000  | -1.949205000 | -3.395382000 |
| 1  | -0.102277000 | -2.911576000 | 4.935966000  | 1 | 1.627891000  | -2.792077000 | -2.865082000 |
| 17 | 3.179048000  | 1.530794000  | -1.771686000 | 6 | -0.766119000 | -2.152159000 | -4.551703000 |
| 6  | -0.309566000 | 1.148171000  | -1.425060000 | 1 | -0.102277000 | -2.911576000 | -4.935966000 |

4

E = -9209.6475767

Free energy = -9209.066882

|    |              |              |              |   |              |              |              |
|----|--------------|--------------|--------------|---|--------------|--------------|--------------|
| 34 | -0.020815000 | -1.239937000 | -1.479321000 | 6 | -0.002023000 | -0.297582000 | 2.961039000  |
| 32 | 0.013986000  | 0.930685000  | -0.394598000 | 1 | -0.017262000 | -1.376226000 | 2.803022000  |
| 31 | -0.038263000 | -2.984271000 | 0.151675000  | 1 | 0.000906000  | -0.081129000 | 4.026451000  |
| 17 | 1.724167000  | -2.928999000 | 1.562037000  | 6 | 1.406810000  | 0.533123000  | 1.080227000  |
| 7  | -2.706621000 | 0.810827000  | 0.953485000  | 6 | 3.373298000  | 0.557642000  | 2.168678000  |
| 6  | -1.386747000 | 0.569247000  | 1.079644000  | 1 | 4.434509000  | 0.674321000  | 2.271735000  |
| 17 | -0.067235000 | -4.913491000 | -0.897294000 | 6 | 2.419964000  | 0.236380000  | 3.069888000  |
| 7  | -1.202803000 | 0.279515000  | 2.386896000  | 1 | 2.489827000  | -0.018574000 | 4.110639000  |
| 6  | -3.352982000 | 0.645520000  | 2.165388000  | 6 | -3.344654000 | 1.254797000  | -0.263335000 |
| 1  | -4.411235000 | 0.787324000  | 2.267009000  | 6 | -3.908959000 | 0.297554000  | -1.116326000 |
| 17 | -1.788736000 | -2.886207000 | 1.574807000  | 6 | -4.536082000 | 0.770701000  | -2.267135000 |
| 7  | 1.214315000  | 0.246121000  | 2.387069000  | 1 | -4.976316000 | 0.064066000  | -2.954645000 |
| 6  | -2.409281000 | 0.301711000  | 3.068319000  | 6 | -4.592870000 | 2.126851000  | -2.547274000 |
| 1  | -2.487169000 | 0.049579000  | 4.109174000  | 1 | -5.083393000 | 2.469482000  | -3.448588000 |
| 7  | 2.732703000  | 0.741090000  | 0.956558000  | 6 | -4.016259000 | 3.046871000  | -1.685638000 |

|   |              |              |              |   |             |              |              |
|---|--------------|--------------|--------------|---|-------------|--------------|--------------|
| 1 | -4.059682000 | 4.100149000  | -1.922650000 | 6 | 4.638696000 | 2.039360000  | -2.540237000 |
| 6 | -3.374510000 | 2.630040000  | -0.522254000 | 1 | 5.131034000 | 2.377008000  | -3.442433000 |
| 6 | -2.764991000 | 3.645301000  | 0.425978000  | 6 | 4.107299000 | 2.966436000  | -1.658081000 |
| 1 | -2.091394000 | 3.117426000  | 1.099846000  | 1 | 4.188524000 | 4.021539000  | -1.878184000 |
| 6 | -3.854042000 | 4.305189000  | 1.283282000  | 6 | 3.463457000 | 2.555585000  | -0.493272000 |
| 1 | -4.556925000 | 4.855761000  | 0.656344000  | 6 | 2.899717000 | 3.582710000  | 0.469990000  |
| 1 | -3.412314000 | 5.006127000  | 1.993227000  | 1 | 2.310401000 | 3.058582000  | 1.221077000  |
| 1 | -4.421424000 | 3.563727000  | 1.846437000  | 6 | 4.028917000 | 4.317162000  | 1.204765000  |
| 6 | -1.925776000 | 4.695571000  | -0.306370000 | 1 | 4.672652000 | 3.618912000  | 1.740965000  |
| 1 | -1.180391000 | 4.220349000  | -0.941706000 | 1 | 3.619560000 | 5.025841000  | 1.926302000  |
| 1 | -1.407708000 | 5.329785000  | 0.414012000  | 1 | 4.652969000 | 4.872849000  | 0.503527000  |
| 1 | -2.542904000 | 5.344450000  | -0.928336000 | 6 | 1.958314000 | 4.565958000  | -0.231570000 |
| 6 | -3.872984000 | -1.181061000 | -0.794145000 | 1 | 2.491810000 | 5.188334000  | -0.950513000 |
| 1 | -3.019427000 | -1.362052000 | -0.147491000 | 1 | 1.493692000 | 5.230190000  | 0.498523000  |
| 6 | -3.684970000 | -2.066521000 | -2.026798000 | 1 | 1.170900000 | 4.031801000  | -0.760375000 |
| 1 | -4.570200000 | -2.074504000 | -2.665602000 | 6 | 3.828649000 | -1.264957000 | -0.818319000 |
| 1 | -3.500147000 | -3.091755000 | -1.706716000 | 1 | 2.970509000 | -1.426929000 | -0.172689000 |
| 1 | -2.826633000 | -1.744861000 | -2.612756000 | 6 | 5.075336000 | -1.723545000 | -0.047892000 |
| 6 | -5.131957000 | -1.599422000 | -0.021298000 | 1 | 5.972372000 | -1.612446000 | -0.660237000 |
| 1 | -5.264321000 | -1.015366000 | 0.889430000  | 1 | 4.972329000 | -2.772542000 | 0.228980000  |
| 1 | -5.057408000 | -2.648432000 | 0.264506000  | 1 | 5.222682000 | -1.151311000 | 0.868076000  |
| 1 | -6.025320000 | -1.469598000 | -0.635298000 | 6 | 3.618281000 | -2.135196000 | -2.057746000 |
| 6 | 3.382231000  | 1.179190000  | -0.256048000 | 1 | 2.769833000 | -1.785896000 | -2.642206000 |
| 6 | 3.906426000  | 0.214768000  | -1.126918000 | 1 | 3.405475000 | -3.157460000 | -1.745781000 |
| 6 | 4.537450000  | 0.681748000  | -2.277714000 | 1 | 4.503998000 | -2.162152000 | -2.695397000 |
| 1 | 4.946885000  | -0.029839000 | -2.978929000 |   |             |              |              |

5

E = -7076.1723657

Free energy (298.15) = -7075.512761

|    |              |              |              |   |             |              |              |
|----|--------------|--------------|--------------|---|-------------|--------------|--------------|
| 52 | 0.095675000  | -1.227303000 | -1.583986000 | 6 | 4.558208000 | 0.978795000  | -2.157461000 |
| 32 | -0.067845000 | 1.071108000  | -0.309131000 | 1 | 5.078838000 | 0.279346000  | -2.794371000 |
| 31 | 0.167365000  | -3.027483000 | 0.272522000  | 6 | 4.481174000 | 2.312979000  | -2.522735000 |
| 17 | 1.900362000  | -2.771042000 | 1.702207000  | 1 | 4.947469000 | 2.647079000  | -3.439969000 |
| 7  | 2.660435000  | 1.021068000  | 1.020956000  | 6 | 3.805038000 | 3.222450000  | -1.724017000 |
| 6  | 1.350451000  | 0.719547000  | 1.139575000  | 1 | 3.750907000 | 4.258270000  | -2.024657000 |
| 7  | 1.175930000  | 0.411322000  | 2.444841000  | 6 | 3.191146000 | 2.816820000  | -0.541997000 |
| 17 | 0.287040000  | -5.019254000 | -0.652300000 | 6 | 2.498037000 | 3.825020000  | 0.356211000  |
| 6  | -1.441244000 | 0.551784000  | 1.134408000  | 1 | 1.779487000 | 3.288324000  | 0.974637000  |
| 17 | -1.624172000 | -2.950868000 | 1.649206000  | 6 | 1.707563000 | 4.874778000  | -0.427214000 |
| 7  | -1.235138000 | 0.261290000  | 2.439294000  | 1 | 1.124665000 | 5.489579000  | 0.259062000  |
| 6  | 3.307367000  | 0.879272000  | 2.235878000  | 1 | 1.021568000 | 4.401615000  | -1.127883000 |
| 1  | 4.357244000  | 1.068283000  | 2.344183000  | 1 | 2.363383000 | 5.543563000  | -0.985427000 |
| 7  | -2.776853000 | 0.700796000  | 1.014916000  | 6 | 3.515703000 | 4.490901000  | 1.294185000  |
| 6  | 2.377344000  | 0.485509000  | 3.131585000  | 1 | 4.043715000 | 3.753936000  | 1.899303000  |
| 1  | 2.462672000  | 0.228778000  | 4.170661000  | 1 | 3.016972000 | 5.188710000  | 1.968589000  |
| 6  | 0.004044000  | -0.229466000 | 3.010281000  | 1 | 4.259439000 | 5.045543000  | 0.720208000  |
| 1  | -0.011224000 | -0.023686000 | 4.077705000  | 6 | 4.079615000 | -0.935244000 | -0.571241000 |
| 1  | 0.072905000  | -1.304661000 | 2.843884000  | 1 | 3.248890000 | -1.166901000 | 0.090096000  |
| 6  | -2.437689000 | 0.194433000  | 3.123923000  | 6 | 3.998866000 | -1.910887000 | -1.746789000 |
| 1  | -2.493851000 | -0.073211000 | 4.162250000  | 1 | 4.893067000 | -1.871451000 | -2.371644000 |
| 6  | -3.405583000 | 0.481849000  | 2.227595000  | 1 | 3.126888000 | -1.709090000 | -2.364813000 |
| 1  | -4.470190000 | 0.553743000  | 2.334637000  | 1 | 3.907644000 | -2.927279000 | -1.364626000 |
| 6  | 3.287141000  | 1.461668000  | -0.202038000 | 6 | 5.377390000 | -1.170448000 | 0.217275000  |
| 6  | 3.961112000  | 0.516561000  | -0.986287000 | 1 | 6.250486000 | -0.986061000 | -0.411531000 |



|   |              |              |              |   |              |              |              |
|---|--------------|--------------|--------------|---|--------------|--------------|--------------|
| 1 | 5.415776000  | -2.202660000 | 0.565595000  | 1 | -4.929915000 | -2.859922000 | 0.346969000  |
| 1 | 5.453558000  | -0.521761000 | 1.089448000  | 6 | -3.673515000 | -2.212078000 | -1.983635000 |
| 6 | -3.447654000 | 1.119983000  | -0.191818000 | 1 | -4.584825000 | -2.255643000 | -2.583144000 |
| 6 | -3.565577000 | 2.493593000  | -0.430777000 | 1 | -3.434358000 | -3.229270000 | -1.674343000 |
| 6 | -4.224287000 | 2.885601000  | -1.593902000 | 1 | -2.855337000 | -1.855286000 | -2.605940000 |
| 1 | -4.333883000 | 3.937794000  | -1.815139000 | 6 | -3.040019000 | 3.536690000  | 0.537295000  |
| 6 | -4.737590000 | 1.943616000  | -2.470634000 | 1 | -2.418311000 | 3.033951000  | 1.276695000  |
| 1 | -5.242289000 | 2.266723000  | -3.371321000 | 6 | -2.155234000 | 4.574981000  | -0.158180000 |
| 6 | -4.605421000 | 0.589382000  | -2.203568000 | 1 | -1.343275000 | 4.088991000  | -0.696166000 |
| 1 | -5.003867000 | -0.132699000 | -2.900131000 | 1 | -1.721564000 | 5.253465000  | 0.577853000  |
| 6 | -3.956815000 | 0.140426000  | -1.055422000 | 1 | -2.723306000 | 5.178435000  | -0.866774000 |
| 6 | -3.845905000 | -1.337219000 | -0.741429000 | 6 | -4.197545000 | 4.205053000  | 1.291347000  |
| 1 | -2.961286000 | -1.483530000 | -0.126635000 | 1 | -4.853251000 | 4.739675000  | 0.602626000  |
| 6 | -5.058233000 | -1.812963000 | 0.072993000  | 1 | -3.816814000 | 4.922432000  | 2.020040000  |
| 1 | -5.976693000 | -1.716625000 | -0.509246000 | 1 | -4.802497000 | 3.469166000  | 1.822221000  |
| 1 | -5.184059000 | -1.243261000 | 0.992967000  |   |              |              |              |

**(b) Compounds 3-5 calculated at ZORA-BP86-D3(BJ)/def2-TVZP(-f)**

**3**

E = -11772.7600822

Free energy= -11772.1929191

|    |             |             |             |    |             |             |             |
|----|-------------|-------------|-------------|----|-------------|-------------|-------------|
| Se | -2.48547000 | -1.28132200 | 0.00109500  | C  | 1.28835700  | -0.86759500 | 3.69235500  |
| Ge | -0.52347300 | -0.23382500 | 0.00038300  | H  | 1.48289500  | -0.28911400 | 2.77900700  |
| Ga | 3.19744800  | 0.15333500  | -0.00224200 | C  | 1.80041000  | -0.03224900 | 4.88000700  |
| Cl | 3.09011100  | 1.55014900  | 1.76258400  | H  | 1.29688500  | 0.94147000  | 4.94194900  |
| C  | -0.33750900 | 1.19301200  | 1.41906300  | H  | 2.87658500  | 0.15833300  | 4.76634100  |
| Cl | 5.10223400  | -0.93076600 | -0.00348800 | H  | 1.63449700  | -0.56340100 | 5.82967700  |
| C  | -0.42020400 | 2.31619500  | 3.36520600  | C  | 2.08921600  | -2.16574700 | 3.57179900  |
| H  | -0.58277300 | 2.44197900  | 4.42679300  | H  | 2.09871500  | -2.73161800 | 4.51544500  |
| C  | -0.02745800 | 3.19957600  | 2.40537500  | H  | 3.13034300  | -1.92488800 | 3.31740500  |
| H  | 0.25426900  | 4.24285500  | 2.46777100  | H  | 1.69276300  | -2.80665400 | 2.77352400  |
| C  | 0.60910600  | 3.01861900  | -0.00189900 | Se | 1.45945700  | -1.49724300 | 0.00021100  |
| H  | 0.48536200  | 4.10762200  | -0.00238200 | C  | -0.74550800 | -2.24122600 | 4.36960500  |
| H  | 1.68113900  | 2.75961000  | -0.00253300 | H  | -0.07112500 | -3.03464300 | 4.68875200  |
| C  | -1.12801700 | -0.10130300 | 3.38279600  | Cl | 3.08828600  | 1.54819700  | -1.76817500 |
| C  | -0.20896400 | -1.08009900 | 3.80075900  | C  | -0.33873600 | 1.19147000  | -1.42011800 |
| C  | -2.12107900 | -2.39841300 | 4.52067300  | C  | -0.42601700 | 2.31361100  | -3.36670200 |
| H  | -2.51616800 | -3.31671500 | 4.95755000  | H  | -0.59085000 | 2.43865600  | -4.42802900 |
| N  | -0.00425000 | 2.49422500  | 1.20971200  | C  | -0.03201200 | 3.19776500  | -2.40810800 |
| C  | -2.99772700 | -1.39684700 | 4.11197400  | H  | 0.24875100  | 4.24124600  | -2.47159000 |
| H  | -4.07193300 | -1.54157900 | 4.22348400  | C  | -1.13200800 | -0.10432100 | -3.38189500 |
| C  | -2.52163700 | -0.22114900 | 3.52262900  | C  | -0.21325900 | -1.08370800 | -3.79921600 |
| C  | -3.47465900 | 0.88297600  | 3.09566800  | C  | -2.12590900 | -2.40258500 | -4.51677600 |
| H  | -2.97314600 | 1.47306300  | 2.31307000  | H  | -2.52128800 | -3.32135000 | -4.95241500 |
| C  | -3.78506700 | 1.81015100  | 4.28645600  | N  | -0.00599600 | 2.49306600  | -1.21211900 |
| H  | -4.30846100 | 1.25116800  | 5.07623600  | C  | -3.00221000 | -1.40033000 | -4.10911300 |
| H  | -4.43246700 | 2.64068300  | 3.96927000  | H  | -4.07648500 | -1.54493000 | -4.22016700 |
| H  | -2.87540600 | 2.23579300  | 4.73128800  | C  | -2.52565500 | -0.22407500 | -3.52120900 |
| N  | -0.61722600 | 1.09494800  | 2.73911300  | C  | -3.47847700 | 0.88062700  | -3.09528800 |
| C  | -4.77787300 | 0.35202200  | 2.48806700  | H  | -2.97584300 | 1.47307700  | -2.31521400 |
| H  | -4.55993000 | -0.32662700 | 1.65333100  | C  | -3.79142200 | 1.80445200  | -4.28803700 |
| H  | -5.38039900 | 1.19131800  | 2.11119200  | H  | -4.31579000 | 1.24300300  | -5.07541700 |
| H  | -5.38703100 | -0.17840500 | 3.23473200  | H  | -4.43878700 | 2.63548300  | -3.97208600 |

|   |             |             |             |   |             |             |             |
|---|-------------|-------------|-------------|---|-------------|-------------|-------------|
| H | -2.88271800 | 2.22927100  | -4.73561200 | H | 1.29149100  | 0.93728800  | -4.94297800 |
| N | -0.62090100 | 1.09252700  | -2.73958300 | H | 2.87123700  | 0.15396900  | -4.76888700 |
| C | -4.78040000 | 0.35058000  | -2.48410700 | H | 1.62771500  | -0.56819300 | -5.83025700 |
| H | -4.56077600 | -0.32574500 | -1.64792500 | C | 2.08527200  | -2.16902100 | -3.57164600 |
| H | -5.38286000 | 1.19054600  | -2.10862600 | H | 2.09383800  | -2.73558600 | -4.51488900 |
| H | -5.39031400 | -0.18233900 | -3.22836700 | H | 3.12663600  | -1.92783100 | -3.31854200 |
| C | 1.28414900  | -0.87105300 | -3.69234400 | H | 1.68976500  | -2.80940000 | -2.77246700 |
| H | 1.47956000  | -0.29194700 | -2.77959300 | C | -0.75024000 | -2.24545100 | -4.36634800 |
| C | 1.79488800  | -0.03650200 | -4.88111000 | H | -0.07614000 | -3.03935900 | -4.68485100 |

4

E = -9326.5215626

Free energy = -9325.9558887

|    |             |             |             |   |             |             |             |
|----|-------------|-------------|-------------|---|-------------|-------------|-------------|
| Se | -0.03559900 | -1.17855700 | -1.44943900 | H | -1.44661200 | 5.40664000  | 0.39142900  |
| Ge | 0.02886100  | 0.99800900  | -0.35379300 | H | -2.61634300 | 5.40120900  | -0.94012800 |
| Ga | -0.05168500 | -2.89722400 | 0.19899600  | C | -3.78274000 | -1.20044300 | -0.79513600 |
| Cl | 1.71981600  | -2.86478400 | 1.60535000  | H | -2.91825000 | -1.36163800 | -0.13771200 |
| N  | -2.69830500 | 0.82826600  | 0.96121900  | C | -3.59396200 | -2.11371900 | -2.00902700 |
| C  | -1.36733200 | 0.60871600  | 1.11122900  | H | -4.49754400 | -2.16038500 | -2.63637300 |
| Cl | -0.09679400 | -4.82553400 | -0.86553200 | H | -3.37550200 | -3.13329100 | -1.66376800 |
| N  | -1.20443000 | 0.32378200  | 2.43237700  | H | -2.74527400 | -1.78500400 | -2.62277500 |
| C  | -3.36842900 | 0.65080100  | 2.16356800  | C | -5.04182500 | -1.60798900 | -0.00897500 |
| H  | -4.44004300 | 0.77386900  | 2.24623600  | H | -5.17672600 | -0.99956100 | 0.89489500  |
| Cl | -1.79246000 | -2.81647500 | 1.64489000  | H | -4.95826000 | -2.65778000 | 0.30404800  |
| N  | 1.21668500  | 0.26952800  | 2.44173300  | H | -5.94328500 | -1.49703100 | -0.63113400 |
| C  | -2.42907900 | 0.31985400  | 3.09159200  | C | 3.36743000  | 1.17930900  | -0.23421900 |
| H  | -2.52507100 | 0.05488200  | 4.13698300  | C | 3.81490200  | 0.21621700  | -1.15858900 |
| N  | 2.74202900  | 0.72918000  | 0.99001400  | C | 4.39209500  | 0.69746800  | -2.33961300 |
| C  | -0.00853200 | -0.26543600 | 3.01646300  | H | 4.73684100  | -0.01580100 | -3.08745200 |
| H  | -0.03361200 | -1.35623700 | 2.84941900  | C | 4.51494800  | 2.06558300  | -2.57762100 |
| H  | -0.00771800 | -0.04720800 | 4.09147000  | H | 4.96377000  | 2.41584200  | -3.50829100 |
| C  | 1.40240300  | 0.55663600  | 1.12382900  | C | 4.06000200  | 2.98942700  | -1.64014200 |
| C  | 3.39344800  | 0.51935200  | 2.19689700  | H | 4.15354100  | 4.05753700  | -1.84188600 |
| H  | 4.46726700  | 0.61281600  | 2.29175900  | C | 3.47003800  | 2.56460600  | -0.44323300 |
| C  | 2.43296900  | 0.21724500  | 3.11327300  | C | 2.96470000  | 3.57944100  | 0.56774200  |
| H  | 2.50750400  | -0.05573100 | 4.15831400  | H | 2.49351300  | 3.03043000  | 1.39542700  |
| C  | -3.29937200 | 1.25238500  | -0.28467300 | C | 4.12496000  | 4.39478400  | 1.15828500  |
| C  | -3.82034300 | 0.27128800  | -1.14868800 | H | 4.87789500  | 3.74031500  | 1.62052200  |
| C  | -4.39253700 | 0.72236000  | -2.34453300 | H | 3.75783400  | 5.09288800  | 1.92520900  |
| H  | -4.79399500 | -0.00809100 | -3.04612600 | H | 4.62907900  | 4.98570300  | 0.37916700  |
| C  | -4.43523600 | 2.07934900  | -2.65565600 | C | 1.89003500  | 4.48635600  | -0.04747100 |
| H  | -4.88164600 | 2.40720600  | -3.59551600 | H | 2.30525600  | 5.11018200  | -0.85272200 |
| C  | -3.89612700 | 3.02184100  | -1.78244600 | H | 1.46844900  | 5.15721400  | 0.71501100  |
| H  | -3.92234500 | 4.07897000  | -2.04659800 | H | 1.07415400  | 3.88411100  | -0.47029000 |
| C  | -3.30732300 | 2.62812100  | -0.57527900 | C | 3.69930400  | -1.26649400 | -0.87397400 |
| C  | -2.73096700 | 3.65515200  | 0.38459900  | H | 2.81616600  | -1.41216900 | -0.23791500 |
| H  | -2.01684200 | 3.13578400  | 1.04109600  | C | 4.92212800  | -1.76759600 | -0.08521100 |
| C  | -3.84092200 | 4.24161800  | 1.27303400  | H | 5.84061300  | -1.66809700 | -0.68395400 |
| H  | -4.59208800 | 4.76128600  | 0.66006500  | H | 4.78437300  | -2.82573800 | 0.17593000  |
| H  | -3.42562700 | 4.96388400  | 1.99180600  | H | 5.06419100  | -1.21046900 | 0.85042100  |
| H  | -4.35755700 | 3.45473300  | 1.84012200  | C | 3.48922100  | -2.11600700 | -2.12929100 |
| C  | -1.95395200 | 4.76108100  | -0.33916800 | H | 2.66353200  | -1.72438000 | -2.73742600 |
| H  | -1.19258000 | 4.33257600  | -1.00519700 | H | 3.22196000  | -3.13905100 | -1.83172900 |

H 4.39870800 -2.17491900 -2.7468250

5

E = -13774.649943

Free energy = -13774.083655

|    |             |             |             |   |             |             |             |
|----|-------------|-------------|-------------|---|-------------|-------------|-------------|
| Te | 0.07900500  | -1.10016400 | -1.54624400 | H | 4.37679500  | 5.03749300  | 0.79911700  |
| Ge | -0.05977800 | 1.19866500  | -0.24648200 | C | 3.91647200  | -0.94362200 | -0.66790600 |
| Ga | 0.16077900  | -2.88269200 | 0.31500100  | H | 3.04277800  | -1.16944600 | -0.04011400 |
| Cl | 1.89928700  | -2.65139600 | 1.75137000  | C | 3.84746200  | -1.86746000 | -1.88713600 |
| N  | 2.66256400  | 1.01083900  | 1.06768500  | H | 4.77843400  | -1.84353800 | -2.47416400 |
| C  | 1.33296100  | 0.76466500  | 1.19800400  | H | 3.00398700  | -1.60180600 | -2.53712700 |
| N  | 1.15959000  | 0.46258100  | 2.51495200  | H | 3.69265100  | -2.90127000 | -1.54957700 |
| Cl | 0.28601200  | -4.86765300 | -0.64025500 | C | 5.17522700  | -1.25995400 | 0.16079500  |
| C  | -1.43267800 | 0.61489900  | 1.16309100  | H | 6.08545400  | -1.08557500 | -0.43342800 |
| Cl | -1.61824900 | -2.85329300 | 1.71820600  | H | 5.15758800  | -2.31341200 | 0.47203300  |
| N  | -1.25820800 | 0.33615100  | 2.48535100  | H | 5.24067300  | -0.64543100 | 1.06758600  |
| C  | 3.31945100  | 0.83893400  | 2.27821100  | C | -3.40509300 | 1.10158400  | -0.24368800 |
| H  | 4.38607000  | 0.98794100  | 2.37816600  | C | -3.49000300 | 2.47054400  | -0.55216500 |
| N  | -2.77746800 | 0.72662600  | 1.00391900  | C | -4.10497200 | 2.81589800  | -1.76133100 |
| C  | 2.37562700  | 0.47874300  | 3.18982100  | H | -4.19041700 | 3.86686100  | -2.03717600 |
| H  | 2.46352300  | 0.20211500  | 4.23279100  | C | -4.59791500 | 1.83430400  | -2.61797100 |
| C  | -0.02702900 | -0.15888900 | 3.08229600  | H | -5.06695100 | 2.12459900  | -3.55913500 |
| H  | -0.05227300 | 0.06509400  | 4.15596700  | C | -4.48328400 | 0.48581900  | -2.28765500 |
| H  | 0.03184400  | -1.24958100 | 2.92290400  | H | -4.85131800 | -0.27406100 | -2.97597900 |
| C  | -2.48382600 | 0.23410400  | 3.13505800  | C | -3.88055600 | 0.08200700  | -1.09029900 |
| H  | -2.56575300 | -0.04489000 | 4.17788000  | C | -3.76250900 | -1.38162400 | -0.71799000 |
| C  | -3.43909000 | 0.49496700  | 2.20199500  | H | -2.87111500 | -1.49051100 | -0.08492500 |
| H  | -4.51732200 | 0.53653400  | 2.27784400  | C | -4.97876200 | -1.84370200 | 0.10502700  |
| C  | 3.26328800  | 1.47306400  | -0.16353000 | H | -5.89994200 | -1.78296300 | -0.49461400 |
| C  | 3.85750300  | 0.52863000  | -1.02162200 | H | -5.12235000 | -1.23728800 | 1.00829200  |
| C  | 4.41297100  | 1.01875200  | -2.20984700 | H | -4.83493200 | -2.88551600 | 0.42244200  |
| H  | 4.86879800  | 0.31808800  | -2.90846600 | C | -3.56981000 | -2.30296200 | -1.92557400 |
| C  | 4.36946100  | 2.37615400  | -2.52020500 | H | -4.48955700 | -2.39890400 | -2.52293100 |
| H  | 4.80174900  | 2.73244400  | -3.45631300 | H | -3.29634500 | -3.30670600 | -1.57325000 |
| C  | 3.76685100  | 3.28178700  | -1.64967000 | H | -2.75687800 | -1.94567300 | -2.57113700 |
| H  | 3.73261200  | 4.33949700  | -1.91075000 | C | -2.97284600 | 3.54125300  | 0.39394500  |
| C  | 3.19511900  | 2.84875200  | -0.44773400 | H | -2.23726900 | 3.06932600  | 1.06220500  |
| C  | 2.57257100  | 3.83819700  | 0.52252800  | C | -2.24578700 | 4.67093500  | -0.34468600 |
| H  | 1.88903300  | 3.28095600  | 1.17973500  | H | -1.45383500 | 4.26628400  | -0.98901200 |
| C  | 1.73358300  | 4.90895600  | -0.18325500 | H | -1.78398400 | 5.35874900  | 0.37748600  |
| H  | 1.20693800  | 5.52539700  | 0.55900800  | H | -2.93284200 | 5.26029000  | -0.96954400 |
| H  | 0.98345100  | 4.44553200  | -0.83820400 | C | -4.11872900 | 4.08356900  | 1.26424700  |
| H  | 2.35297600  | 5.58553400  | -0.79016500 | H | -4.89364400 | 4.54808600  | 0.63676200  |
| C  | 3.65870900  | 4.47013900  | 1.40951100  | H | -3.74919800 | 4.84240700  | 1.97019700  |
| H  | 4.22092100  | 3.70390800  | 1.96210200  | H | -4.59417600 | 3.27995500  | 1.84370400  |
| H  | 3.21139100  | 5.15879300  | 2.14182300  |   |             |             |             |

(c) Compounds 1'-5' (R=Ph) optimized at B3LYP-D3(BJ)/def2-SV

1'

E = -6333.9048153

Free Energy = -6333.646585

|    |              |              |              |   |              |             |              |
|----|--------------|--------------|--------------|---|--------------|-------------|--------------|
| 32 | -0.000040000 | 0.665365000  | 0.581496000  | 6 | 3.360649000  | 0.712035000 | 0.980331000  |
| 31 | 0.000028000  | -0.347321000 | -1.757977000 | 6 | 3.398417000  | 1.165269000 | -0.341203000 |
| 17 | -0.000488000 | 1.116373000  | -3.420943000 | 6 | 3.997322000  | 2.396801000 | -0.616453000 |
| 7  | 2.714342000  | -0.537122000 | 1.260691000  | 1 | 4.019962000  | 2.762906000 | -1.646353000 |
| 6  | 1.387090000  | -0.750919000 | 1.085090000  | 6 | 4.563258000  | 3.150694000 | 0.416571000  |
| 17 | 1.796331000  | -1.738690000 | -1.969525000 | 1 | 5.031070000  | 4.114568000 | 0.196098000  |
| 7  | 1.201458000  | -2.066868000 | 1.374829000  | 6 | 4.531514000  | 2.677335000 | 1.732908000  |
| 6  | -1.387149000 | -0.750934000 | 1.085080000  | 1 | 4.970590000  | 3.269017000 | 2.541163000  |
| 17 | -1.795618000 | -1.739561000 | -1.969396000 | 6 | 3.922211000  | 1.454038000 | 2.022037000  |
| 7  | -1.201494000 | -2.066870000 | 1.374866000  | 6 | -3.360704000 | 0.712005000 | 0.980289000  |
| 6  | 3.362152000  | -1.711636000 | 1.624949000  | 6 | -3.398415000 | 1.165265000 | -0.341237000 |
| 1  | 4.435977000  | -1.745511000 | 1.787912000  | 6 | -3.997296000 | 2.396806000 | -0.616497000 |
| 7  | -2.714407000 | -0.537151000 | 1.260672000  | 1 | -4.019873000 | 2.762929000 | -1.646392000 |
| 6  | 2.409211000  | -2.678493000 | 1.692849000  | 6 | -4.563280000 | 3.150682000 | 0.416513000  |
| 1  | 2.482094000  | -3.738130000 | 1.925977000  | 1 | -5.031075000 | 4.114563000 | 0.196035000  |
| 6  | -0.000023000 | -2.792766000 | 1.009655000  | 6 | -4.531603000 | 2.677297000 | 1.732842000  |
| 1  | -0.000065000 | -2.955996000 | -0.083591000 | 1 | -4.970717000 | 3.268965000 | 2.541087000  |
| 1  | -0.000012000 | -3.758717000 | 1.533788000  | 6 | -3.922316000 | 1.453995000 | 2.021978000  |
| 6  | -2.409243000 | -2.678506000 | 1.692885000  | 1 | -3.863977000 | 1.081300000 | 3.047866000  |
| 1  | -2.482111000 | -3.738136000 | 1.926045000  | 1 | -2.974318000 | 0.542972000 | -1.133552000 |
| 6  | -3.362200000 | -1.711668000 | 1.624959000  | 1 | 3.863823000  | 1.081359000 | 3.047928000  |
| 1  | -4.436025000 | -1.745556000 | 1.787927000  | 1 | 2.974356000  | 0.542943000 | -1.133517000 |

2'

E = -7130.168278

Free energy = -7129.906940

|    |              |              |              |    |              |              |              |
|----|--------------|--------------|--------------|----|--------------|--------------|--------------|
| 32 | -0.107481000 | -1.070965000 | -0.014949000 | 1  | -4.931776000 | -3.684738000 | -1.416421000 |
| 31 | 0.248294000  | 2.334671000  | -0.756320000 | 6  | -3.961684000 | -2.242997000 | -0.138249000 |
| 17 | 1.983792000  | 2.432813000  | 0.683850000  | 17 | -1.545577000 | 2.708987000  | 0.560565000  |
| 16 | -0.334332000 | -3.147194000 | -0.117485000 | 7  | 1.146397000  | -0.090020000 | 2.565855000  |
| 7  | -1.270984000 | 0.108754000  | 2.519427000  | 6  | 1.329807000  | -0.598922000 | 1.324846000  |
| 6  | -1.495591000 | -0.346606000 | 1.263931000  | 7  | 2.631227000  | -0.921180000 | 1.239865000  |
| 17 | 0.428089000  | 3.889441000  | -2.279457000 | 6  | 3.290771000  | -0.582985000 | 2.410125000  |
| 16 | 0.108069000  | 0.286650000  | -1.748958000 | 1  | 4.357031000  | -0.752210000 | 2.533530000  |
| 7  | -2.826146000 | -0.500207000 | 1.154545000  | 6  | 2.356687000  | -0.052621000 | 3.248090000  |
| 6  | -3.457409000 | -0.107383000 | 2.323658000  | 1  | 2.445208000  | 0.352415000  | 4.253189000  |
| 1  | -4.538680000 | -0.138432000 | 2.427315000  | 6  | 3.248344000  | -1.417825000 | 0.034822000  |
| 6  | -2.477839000 | 0.283984000  | 3.185957000  | 6  | 3.713600000  | -0.489486000 | -0.898819000 |
| 1  | -2.531426000 | 0.675715000  | 4.198785000  | 6  | 4.376365000  | -2.334613000 | -2.319498000 |
| 6  | -0.016865000 | 0.678405000  | 2.981309000  | 1  | 4.816365000  | -2.697849000 | -3.252802000 |
| 1  | 0.077700000  | 1.700735000  | 2.573803000  | 6  | 4.285914000  | -0.959157000 | -2.082469000 |
| 1  | -0.036066000 | 0.707704000  | 4.079545000  | 1  | 4.645638000  | -0.245089000 | -2.828015000 |
| 6  | -3.473209000 | -0.938558000 | -0.054410000 | 6  | 3.889172000  | -3.248528000 | -1.379632000 |
| 6  | -3.540310000 | -0.052102000 | -1.130491000 | 1  | 3.937373000  | -4.322397000 | -1.578577000 |
| 6  | -4.636187000 | -1.786247000 | -2.418038000 | 6  | 3.313908000  | -2.792723000 | -0.191498000 |
| 1  | -5.088891000 | -2.124580000 | -3.354570000 | 1  | 3.597195000  | 0.578103000  | -0.699909000 |
| 6  | -4.127558000 | -0.487729000 | -2.320626000 | 1  | 2.885177000  | -3.485813000 | 0.533713000  |
| 1  | -4.176573000 | 0.190991000  | -3.176116000 | 1  | -3.841715000 | -2.924735000 | 0.705885000  |
| 6  | -4.554821000 | -2.662134000 | -1.329844000 | 1  | -3.123220000 | 0.951811000  | -1.029065000 |

3'

E = -11136.606975

Free Energy = -11136.348451

|    |              |              |              |    |              |              |              |
|----|--------------|--------------|--------------|----|--------------|--------------|--------------|
| 34 | 0.404067000  | -3.165783000 | -0.049457000 | 1  | 4.204665000  | 0.619672000  | -3.044846000 |
| 32 | 0.118906000  | -0.955823000 | 0.058765000  | 17 | -2.061124000 | 2.517510000  | 0.883470000  |
| 31 | -0.322620000 | 2.569872000  | -0.556607000 | 6  | -1.335179000 | -0.538833000 | 1.397160000  |
| 17 | 1.464798000  | 2.889647000  | 0.785069000  | 6  | -3.295342000 | -0.599154000 | 2.483857000  |
| 6  | 1.486922000  | -0.219719000 | 1.350939000  | 1  | -4.357989000 | -0.793362000 | 2.601195000  |
| 17 | -0.541259000 | 4.234603000  | -1.958117000 | 6  | -2.371512000 | -0.078694000 | 3.338669000  |
| 6  | 3.442477000  | 0.081067000  | 2.407235000  | 1  | -2.467029000 | 0.290925000  | 4.356662000  |
| 1  | 4.524631000  | 0.094602000  | 2.504907000  | 6  | -3.247966000 | -1.350444000 | 0.085291000  |
| 6  | 2.451751000  | 0.408266000  | 3.282884000  | 6  | -3.698419000 | -0.400368000 | -0.833645000 |
| 1  | 2.493431000  | 0.778472000  | 4.304293000  | 6  | -4.387337000 | -2.212076000 | -2.284736000 |
| 6  | -0.019099000 | 0.715189000  | 3.098313000  | 1  | -4.831745000 | -2.553419000 | -3.224204000 |
| 1  | -0.000677000 | 0.704294000  | 4.196950000  | 7  | -1.162004000 | -0.066552000 | 2.654657000  |
| 1  | -0.139885000 | 1.749194000  | 2.728691000  | 6  | -3.917632000 | -3.148494000 | -1.358123000 |
| 6  | 3.491290000  | -0.675798000 | 0.009508000  | 1  | -3.983894000 | -4.218260000 | -1.573265000 |
| 6  | 3.545646000  | 0.261394000  | -1.023550000 | 6  | -3.337573000 | -2.720511000 | -0.161941000 |
| 6  | 4.714959000  | -1.375969000 | -2.371853000 | 7  | -2.631463000 | -0.882319000 | 1.301635000  |
| 1  | 5.192051000  | -1.655874000 | -3.315553000 | 6  | -4.276064000 | -0.842249000 | -2.025475000 |
| 7  | 1.250213000  | 0.197407000  | 2.617667000  | 1  | -4.624734000 | -0.110678000 | -2.759155000 |
| 6  | 4.645759000  | -2.303744000 | -1.326708000 | 1  | -2.926085000 | -3.432097000 | 0.555484000  |
| 1  | 5.056514000  | -3.308891000 | -1.453903000 | 1  | -3.570180000 | 0.662008000  | -0.615415000 |
| 6  | 4.023230000  | -1.958720000 | -0.126079000 | 1  | 3.915603000  | -2.680587000 | 0.685508000  |
| 7  | 2.823406000  | -0.310190000 | 1.231434000  | 1  | 3.095651000  | 1.246077000  | -0.882401000 |
| 34 | -0.124297000 | 0.501094000  | -1.765833000 |    |              |              |              |
| 6  | 4.164355000  | -0.099593000 | -2.222687000 |    |              |              |              |

4'

E = -8735.2675094

Free energy = -8735.006468

|    |              |              |              |   |              |              |              |
|----|--------------|--------------|--------------|---|--------------|--------------|--------------|
| 34 | 0.027010000  | 0.116969000  | -1.723682000 | 6 | -2.444157000 | 0.060337000  | 3.233737000  |
| 32 | -0.020580000 | -1.517441000 | 0.081153000  | 1 | -2.514116000 | 0.524372000  | 4.214533000  |
| 31 | 0.037666000  | 2.228324000  | -0.622854000 | 6 | 3.365444000  | -1.398111000 | 0.089545000  |
| 17 | -1.758503000 | 2.448539000  | 0.739496000  | 6 | 3.521284000  | -0.532525000 | -0.995300000 |
| 7  | 2.716426000  | -0.904228000 | 1.273099000  | 6 | 4.139508000  | -1.011332000 | -2.152656000 |
| 6  | 1.382059000  | -0.715400000 | 1.376045000  | 1 | 4.256326000  | -0.346876000 | -3.012716000 |
| 17 | 0.063738000  | 3.889456000  | -2.061603000 | 6 | 4.591742000  | -2.332976000 | -2.214156000 |
| 7  | 1.194081000  | -0.173210000 | 2.606864000  | 1 | 5.070883000  | -2.703051000 | -3.125261000 |
| 6  | 3.371858000  | -0.443882000 | 2.404669000  | 6 | 4.428124000  | -3.188154000 | -1.118605000 |
| 1  | 4.454006000  | -0.482655000 | 2.494320000  | 1 | 4.775715000  | -4.223687000 | -1.170737000 |
| 17 | 1.816919000  | 2.416474000  | 0.766359000  | 6 | 3.808220000  | -2.721725000 | 0.042896000  |
| 7  | -1.227481000 | -0.149329000 | 2.596228000  | 6 | -3.410516000 | -1.329037000 | 0.066944000  |
| 6  | 2.411766000  | 0.021644000  | 3.247378000  | 6 | -3.479089000 | -0.486669000 | -1.044761000 |
| 1  | 2.485468000  | 0.490951000  | 4.225371000  | 6 | -4.102946000 | -0.954060000 | -2.203873000 |
| 7  | -2.756441000 | -0.848675000 | 1.252639000  | 1 | -4.150888000 | -0.308168000 | -3.084433000 |
| 6  | -0.012017000 | 0.508964000  | 3.038417000  | 6 | -4.651017000 | -2.239833000 | -2.239279000 |
| 1  | 0.000021000  | 1.535898000  | 2.630601000  | 1 | -5.135366000 | -2.600933000 | -3.151223000 |
| 1  | -0.016779000 | 0.538278000  | 4.137778000  | 6 | -4.578241000 | -3.070633000 | -1.115352000 |
| 6  | -1.419278000 | -0.681288000 | 1.361204000  | 1 | -5.001557000 | -4.078473000 | -1.146380000 |
| 6  | -3.408437000 | -0.385429000 | 2.385190000  | 6 | -3.951211000 | -2.616879000 | 0.047198000  |
| 1  | -4.491418000 | -0.406935000 | 2.470766000  | 1 | -3.866745000 | -3.255597000 | 0.930119000  |
|    |              |              |              | 1 | -3.038892000 | 0.509998000  | -0.989131000 |

1 3.149209000 0.490611000 -0.920848000 1 3.655417000 -3.376578000 0.904449000

5

E = -6602.0770578

Free energy = -6601.819376

|    |              |              |              |   |              |              |              |
|----|--------------|--------------|--------------|---|--------------|--------------|--------------|
| 52 | 0.000088000  | -0.096671000 | -1.762457000 | 1 | 4.481043000  | -0.145972000 | 2.540005000  |
| 32 | 0.000077000  | -1.625067000 | 0.407836000  | 6 | -3.371863000 | -1.339587000 | 0.271223000  |
| 31 | -0.000154000 | 2.239323000  | -0.661440000 | 6 | -3.646129000 | -0.501019000 | -0.811570000 |
| 17 | -1.785631000 | 2.497288000  | 0.715412000  | 6 | -4.256823000 | -1.044047000 | -1.943877000 |
| 7  | -2.732929000 | -0.773066000 | 1.427798000  | 1 | -4.468398000 | -0.400501000 | -2.801742000 |
| 6  | -1.393646000 | -0.638139000 | 1.555767000  | 6 | -4.572618000 | -2.405502000 | -1.988085000 |
| 7  | -1.213522000 | 0.025774000  | 2.727608000  | 1 | -5.042875000 | -2.826664000 | -2.881455000 |
| 17 | -0.000267000 | 3.862485000  | -2.147588000 | 6 | -4.280335000 | -3.235131000 | -0.900044000 |
| 6  | 1.393754000  | -0.638091000 | 1.555789000  | 1 | -4.520087000 | -4.301299000 | -0.939743000 |
| 17 | 1.785225000  | 2.497569000  | 0.715512000  | 6 | -3.674908000 | -2.701810000 | 0.240647000  |
| 7  | 1.213590000  | 0.025828000  | 2.727621000  | 6 | 3.372003000  | -1.339403000 | 0.271227000  |
| 6  | -3.396189000 | -0.165023000 | 2.482166000  | 6 | 3.675001000  | -2.701635000 | 0.240564000  |
| 1  | -4.480960000 | -0.146238000 | 2.540014000  | 6 | 4.280431000  | -3.234895000 | -0.900151000 |
| 7  | 2.733043000  | -0.772927000 | 1.427810000  | 1 | 4.520139000  | -4.301072000 | -0.939920000 |
| 6  | -2.438949000 | 0.342150000  | 3.302920000  | 6 | 4.572780000  | -2.405202000 | -1.988128000 |
| 1  | -2.517125000 | 0.918348000  | 4.221538000  | 1 | 5.043046000  | -2.826325000 | -2.881511000 |
| 6  | 0.000015000  | 0.715078000  | 3.126325000  | 6 | 4.257041000  | -1.043738000 | -1.943834000 |
| 1  | 0.000004000  | 0.806761000  | 4.222885000  | 1 | 4.468665000  | -0.400138000 | -2.801645000 |
| 1  | 0.000008000  | 1.717767000  | 2.660584000  | 6 | 3.646335000  | -0.500773000 | -0.811504000 |
| 6  | 2.439001000  | 0.342296000  | 3.302917000  | 1 | -3.429516000 | -3.332433000 | 1.098595000  |
| 1  | 2.517143000  | 0.918517000  | 4.221524000  | 1 | -3.360384000 | 0.551539000  | -0.757892000 |
| 6  | 3.396272000  | -0.164831000 | 2.482171000  | 1 | 3.360607000  | 0.551786000  | -0.757758000 |
|    |              |              |              | 1 | 3.429554000  | -3.332310000 | 1.098459000  |

C (S)

E = -6732.0180601

Free energy = -6731.760768

|    |              |              |              |   |              |              |              |
|----|--------------|--------------|--------------|---|--------------|--------------|--------------|
| 32 | -0.054344000 | 0.499191000  | 0.019988000  | 6 | -3.395840000 | -0.737579000 | 2.367137000  |
| 31 | 0.232588000  | -1.426885000 | -1.513339000 | 1 | -4.453710000 | -0.626632000 | 2.590436000  |
| 17 | 0.428927000  | -1.169256000 | -3.678472000 | 6 | 3.209447000  | 1.218343000  | 0.680737000  |
| 7  | 2.586650000  | 0.262904000  | 1.562407000  | 6 | 3.732223000  | 0.753995000  | -0.528029000 |
| 6  | 1.315847000  | -0.151097000 | 1.416370000  | 6 | 4.289306000  | 1.676361000  | -1.417060000 |
| 17 | 2.008567000  | -2.532360000 | -0.623383000 | 1 | 4.690601000  | 1.329417000  | -2.373029000 |
| 7  | 1.137780000  | -1.128177000 | 2.334857000  | 6 | 4.316158000  | 3.035666000  | -1.090269000 |
| 6  | -1.485582000 | -0.353617000 | 1.244523000  | 1 | 4.744205000  | 3.756095000  | -1.793276000 |
| 17 | -1.535610000 | -2.734419000 | -0.954155000 | 6 | 3.778769000  | 3.482292000  | 0.121114000  |
| 7  | -1.261318000 | -1.259853000 | 2.224745000  | 1 | 3.775079000  | 4.548768000  | 0.361388000  |
| 6  | 3.228708000  | -0.470528000 | 2.550239000  | 6 | 3.212703000  | 2.571714000  | 1.014535000  |
| 1  | 4.268630000  | -0.291338000 | 2.810104000  | 6 | -3.447946000 | 0.864557000  | 0.427158000  |
| 7  | -2.788096000 | -0.029507000 | 1.338562000  | 6 | -3.501051000 | 0.513907000  | -0.922804000 |
| 6  | 2.314590000  | -1.355279000 | 3.038182000  | 6 | -4.083129000 | 1.405400000  | -1.825857000 |
| 1  | 2.395926000  | -2.114223000 | 3.812791000  | 1 | -4.117667000 | 1.149366000  | -2.888118000 |
| 6  | -0.021877000 | -2.007075000 | 2.345683000  | 6 | -4.610813000 | 2.618317000  | -1.373748000 |
| 1  | 0.056941000  | -2.712241000 | 1.499952000  | 1 | -5.058990000 | 3.317131000  | -2.085806000 |
| 1  | -0.035651000 | -2.558790000 | 3.295023000  | 6 | -4.557839000 | 2.948033000  | -0.015381000 |
| 6  | -2.431798000 | -1.520044000 | 2.927781000  | 1 | -4.955716000 | 3.904660000  | 0.334239000  |
| 1  | -2.476410000 | -2.233598000 | 3.747228000  | 6 | -3.966586000 | 2.071177000  | 0.895109000  |

|   |              |              |              |    |              |              |              |
|---|--------------|--------------|--------------|----|--------------|--------------|--------------|
| 1 | -3.871488000 | 2.333805000  | 1.951293000  | 1  | 3.668542000  | -0.310004000 | -0.769479000 |
| 1 | -3.084704000 | -0.442878000 | -1.249607000 | 16 | -0.261798000 | 2.588297000  | 0.0678070    |
| 1 | 2.743089000  | 2.904819000  | 1.941497000  |    |              |              |              |

**C(Se)**

E = -8735.2399658

Free energy = -8734.983567

|    |              |              |              |    |              |              |              |
|----|--------------|--------------|--------------|----|--------------|--------------|--------------|
| 32 | -0.000164000 | 0.306674000  | 0.023004000  | 6  | -3.517145000 | 0.456750000  | 0.804376000  |
| 31 | 0.000758000  | -1.736825000 | 1.428066000  | 6  | -4.085499000 | 1.308994000  | 1.753235000  |
| 17 | 0.001532000  | -1.624249000 | 3.614470000  | 1  | -4.217952000 | 0.958689000  | 2.780292000  |
| 7  | -2.691356000 | 0.064678000  | -1.450602000 | 6  | -4.473803000 | 2.602174000  | 1.391403000  |
| 6  | -1.411144000 | -0.334587000 | -1.338738000 | 1  | -4.910847000 | 3.269457000  | 2.139720000  |
| 17 | -1.784836000 | -2.880669000 | 0.623758000  | 6  | -4.294594000 | 3.051962000  | 0.079061000  |
| 7  | -1.201118000 | -1.187592000 | -2.368377000 | 1  | -4.581996000 | 4.070070000  | -0.197320000 |
| 6  | 1.410699000  | -0.333953000 | -1.339155000 | 6  | -3.715976000 | 2.214197000  | -0.875122000 |
| 17 | 1.786229000  | -2.880085000 | 0.622699000  | 6  | 3.337315000  | 0.927383000  | -0.498560000 |
| 7  | 1.200794000  | -1.187106000 | -2.368701000 | 6  | 3.517194000  | 0.457726000  | 0.803603000  |
| 6  | -3.300019000 | -0.544468000 | -2.539613000 | 6  | 4.085468000  | 1.310088000  | 1.752415000  |
| 1  | -4.342227000 | -0.361345000 | -2.787528000 | 1  | 4.218466000  | 0.959654000  | 2.779358000  |
| 7  | 2.690793000  | 0.065632000  | -1.451159000 | 6  | 4.472996000  | 2.603520000  | 1.390676000  |
| 6  | -2.359705000 | -1.341284000 | -3.120212000 | 1  | 4.909991000  | 3.270887000  | 2.138946000  |
| 1  | -2.413562000 | -1.998286000 | -3.985129000 | 6  | 4.293062000  | 3.053462000  | 0.078479000  |
| 6  | -0.000021000 | -1.996271000 | -2.492524000 | 1  | 4.579853000  | 4.071765000  | -0.197816000 |
| 1  | 0.000238000  | -2.762974000 | -1.699020000 | 6  | 3.714508000  | 2.215585000  | -0.875639000 |
| 1  | -0.000062000 | -2.477277000 | -3.479473000 | 1  | 3.517865000  | 2.566759000  | -1.891026000 |
| 6  | 2.359371000  | -1.340602000 | -3.120595000 | 1  | 3.206544000  | -0.558871000 | 1.059154000  |
| 1  | 2.413324000  | -1.997685000 | -3.985446000 | 1  | -3.519896000 | 2.565295000  | -1.890646000 |
| 6  | 3.299524000  | -0.543481000 | -2.540155000 | 1  | -3.205887000 | -0.559649000 | 1.059982000  |
| 1  | 4.341643000  | -0.360051000 | -2.788215000 | 34 | -0.000669000 | 2.543135000  | 0.114240000  |
| 6  | -3.337983000 | 0.926264000  | -0.497941000 |    |              |              |              |

**TS1 C(S)→D(S)**

E = -6731.9728586

Free energy = -6731.713079

|    |              |              |              |   |              |              |              |
|----|--------------|--------------|--------------|---|--------------|--------------|--------------|
| 32 | 0.037846000  | 0.183431000  | -0.204440000 | 1 | 0.164199000  | 3.354492000  | -3.093526000 |
| 31 | -0.186963000 | -2.325906000 | -0.812032000 | 6 | 2.500080000  | 3.182631000  | -1.837313000 |
| 17 | -0.498925000 | -4.145036000 | 0.375824000  | 1 | 2.582097000  | 3.945060000  | -2.609329000 |
| 7  | -2.544019000 | 1.987834000  | -0.132507000 | 6 | 3.412343000  | 2.717249000  | -0.942368000 |
| 6  | -1.294752000 | 1.697085000  | -0.577475000 | 1 | 4.452380000  | 2.988546000  | -0.777857000 |
| 17 | -1.993014000 | -2.080588000 | -2.132339000 | 6 | -3.261458000 | 1.301924000  | 0.912504000  |
| 7  | -1.057992000 | 2.580985000  | -1.587477000 | 6 | -3.520019000 | -0.065984000 | 0.790615000  |
| 6  | 1.507612000  | 1.556115000  | -0.608208000 | 6 | -4.232363000 | -0.711290000 | 1.804885000  |
| 17 | 1.754844000  | -2.516127000 | -1.915390000 | 1 | -4.423368000 | -1.784583000 | 1.720573000  |
| 7  | 1.338927000  | 2.453810000  | -1.620894000 | 6 | -4.686693000 | 0.004332000  | 2.916362000  |
| 6  | -3.073798000 | 3.054824000  | -0.852249000 | 1 | -5.240729000 | -0.508991000 | 3.707957000  |
| 1  | -4.074635000 | 3.432528000  | -0.657118000 | 6 | -4.428327000 | 1.375722000  | 3.022021000  |
| 7  | 2.792678000  | 1.717584000  | -0.197846000 | 1 | -4.774864000 | 1.937039000  | 3.894806000  |
| 6  | -2.140659000 | 3.430726000  | -1.767762000 | 6 | -3.709459000 | 2.030825000  | 2.019688000  |
| 1  | -2.161044000 | 4.205581000  | -2.531420000 | 6 | 3.459031000  | 0.980727000  | 0.845550000  |
| 6  | 0.127485000  | 2.488152000  | -2.419340000 | 6 | 3.530225000  | -0.413307000 | 0.776418000  |
| 1  | 0.067960000  | 1.552302000  | -3.008793000 | 6 | 4.199370000  | -1.105561000 | 1.789342000  |

|   |             |              |             |    |              |              |              |
|---|-------------|--------------|-------------|----|--------------|--------------|--------------|
| 1 | 4.245815000 | -2.197071000 | 1.744763000 | 1  | 3.962651000  | 2.776001000  | 1.948052000  |
| 6 | 4.794438000 | -0.413546000 | 2.847942000 | 1  | 3.081443000  | -0.957811000 | -0.059073000 |
| 1 | 5.313892000 | -0.963983000 | 3.638042000 | 1  | -3.478795000 | 3.096637000  | 2.105023000  |
| 6 | 4.721235000 | 0.982991000  | 2.902137000 | 1  | -3.179609000 | -0.622145000 | -0.087550000 |
| 1 | 5.177410000 | 1.528209000  | 3.733747000 | 16 | -0.001419000 | -0.675077000 | 1.756141000  |
| 6 | 4.048403000 | 1.686547000  | 1.900907000 |    |              |              |              |

**TS1 C(Se) → 4'(Se)**

E = -8735.1950011

Free energy = -8734.936506

|    |              |              |              |    |              |              |              |
|----|--------------|--------------|--------------|----|--------------|--------------|--------------|
| 32 | 0.205536000  | 0.360603000  | -0.261224000 | 6  | -3.349995000 | 0.255400000  | 0.471474000  |
| 31 | -0.754384000 | -1.823926000 | -1.206103000 | 6  | -4.055390000 | -0.662131000 | 1.251769000  |
| 17 | -2.174829000 | -3.290537000 | -0.380997000 | 1  | -4.374154000 | -1.604303000 | 0.801571000  |
| 7  | -2.102341000 | 2.341767000  | 0.273850000  | 6  | -4.304035000 | -0.388991000 | 2.598663000  |
| 6  | -0.898067000 | 2.048907000  | -0.269167000 | 1  | -4.845677000 | -1.115742000 | 3.210762000  |
| 17 | -1.951189000 | -0.763977000 | -2.811862000 | 6  | -3.849962000 | 0.803354000  | 3.174185000  |
| 7  | -0.537860000 | 3.156673000  | -0.972394000 | 1  | -4.035235000 | 1.009387000  | 4.232159000  |
| 6  | 1.834167000  | 1.536729000  | -0.434983000 | 6  | -3.130779000 | 1.721044000  | 2.407290000  |
| 17 | 1.075461000  | -2.801821000 | -1.998293000 | 6  | 3.638053000  | 0.212086000  | 0.624987000  |
| 7  | 1.811042000  | 2.710008000  | -1.131326000 | 6  | 3.302239000  | -1.063850000 | 0.171000000  |
| 6  | -2.489552000 | 3.630408000  | -0.074454000 | 6  | 3.776748000  | -2.177997000 | 0.864003000  |
| 1  | -3.436647000 | 4.047244000  | 0.258522000  | 1  | 3.488444000  | -3.172526000 | 0.514633000  |
| 7  | 3.130129000  | 1.356314000  | -0.075738000 | 6  | 4.587608000  | -2.013045000 | 1.989060000  |
| 6  | -1.505563000 | 4.148075000  | -0.861110000 | 1  | 4.953985000  | -2.888191000 | 2.533174000  |
| 1  | -1.417208000 | 5.112571000  | -1.355981000 | 6  | 4.925585000  | -0.727309000 | 2.429118000  |
| 6  | 0.626571000  | 3.161969000  | -1.835581000 | 1  | 5.551383000  | -0.595943000 | 3.316343000  |
| 1  | 0.434007000  | 2.475268000  | -2.682147000 | 6  | 4.446176000  | 0.394670000  | 1.751101000  |
| 1  | 0.795758000  | 4.180400000  | -2.209147000 | 1  | 4.673360000  | 1.402833000  | 2.108134000  |
| 6  | 3.080830000  | 3.270199000  | -1.192978000 | 1  | 2.681955000  | -1.207996000 | -0.716326000 |
| 1  | 3.284981000  | 4.204431000  | -1.711262000 | 1  | -2.730619000 | 2.636087000  | 2.851727000  |
| 6  | 3.908017000  | 2.417631000  | -0.528192000 | 1  | -3.146410000 | 0.052118000  | -0.583130000 |
| 1  | 4.980192000  | 2.452135000  | -0.353268000 | 34 | -0.006700000 | -0.893061000 | 1.632965000  |
| 6  | -2.887469000 | 1.430031000  | 1.063919000  |    |              |              |              |

**D(S) = 4'(X=S)**

E = -6732.0488923

Free Energy = -6731.78603

|    |              |              |              |   |              |              |              |
|----|--------------|--------------|--------------|---|--------------|--------------|--------------|
| 32 | -0.000445000 | -1.428241000 | -0.112180000 | 7 | -2.741142000 | -0.894709000 | 1.139394000  |
| 31 | 0.000449000  | 2.217573000  | -0.692227000 | 6 | -0.000242000 | 0.461755000  | 2.930289000  |
| 17 | -1.787624000 | 2.420580000  | 0.678238000  | 1 | -0.000039000 | 1.493996000  | 2.536593000  |
| 7  | 2.740440000  | -0.895553000 | 1.139640000  | 1 | -0.000238000 | 0.475894000  | 4.029594000  |
| 6  | 1.407389000  | -0.686759000 | 1.230653000  | 6 | -1.408045000 | -0.686118000 | 1.230497000  |
| 17 | 0.001454000  | 3.865164000  | -2.142683000 | 6 | -3.384934000 | -0.504995000 | 2.304377000  |
| 7  | 1.209247000  | -0.204900000 | 2.484447000  | 1 | -4.464815000 | -0.565261000 | 2.409027000  |
| 6  | 3.384256000  | -0.505848000 | 2.304590000  | 6 | -2.418903000 | -0.064565000 | 3.153938000  |
| 1  | 4.464133000  | -0.566032000 | 2.409299000  | 1 | -2.484365000 | 0.351215000  | 4.156472000  |
| 17 | 1.788125000  | 2.420287000  | 0.678808000  | 6 | 3.404310000  | -1.353839000 | -0.048225000 |
| 7  | -1.209827000 | -0.204560000 | 2.484389000  | 6 | 3.404028000  | -0.531238000 | -1.176762000 |
| 6  | 2.418276000  | -0.065070000 | 3.154037000  | 6 | 4.038036000  | -0.981792000 | -2.337021000 |
| 1  | 2.483729000  | 0.350813000  | 4.156549000  | 1 | 4.030305000  | -0.351015000 | -3.229752000 |



|   |              |              |              |    |              |              |              |
|---|--------------|--------------|--------------|----|--------------|--------------|--------------|
| 6 | 4.671451000  | -2.227983000 | -2.356114000 | 1  | -5.165461000 | -2.574166000 | -3.268904000 |
| 1 | 5.165636000  | -2.574918000 | -3.268237000 | 6  | -4.673840000 | -3.035194000 | -1.213904000 |
| 6 | 4.673289000  | -3.036214000 | -1.213446000 | 1  | -5.165078000 | -4.012093000 | -1.230647000 |
| 1 | 5.164285000  | -4.013236000 | -1.230124000 | 6  | -4.033309000 | -2.601097000 | -0.051450000 |
| 6 | 4.032501000  | -2.602123000 | -0.051095000 | 1  | -4.004749000 | -3.227201000 | 0.844156000  |
| 6 | -3.404880000 | -1.352908000 | -0.048578000 | 1  | -2.906265000 | 0.438653000  | -1.135440000 |
| 6 | -3.404035000 | -0.530501000 | -1.177232000 | 1  | 2.906417000  | 0.438009000  | -1.135044000 |
| 6 | -4.037802000 | -0.981093000 | -2.337634000 | 1  | 4.003584000  | -3.228398000 | 0.844378000  |
| 1 | -4.029632000 | -0.350444000 | -3.230478000 | 16 | 0.000136000  | 0.209052000  | -1.726824000 |
| 6 | -4.671472000 | -2.227117000 | -2.356706000 |    |              |              |              |

### INT (X=S)

E= -6732.0289292

Free Energy = -6731.768577

|    |              |              |              |    |              |              |              |
|----|--------------|--------------|--------------|----|--------------|--------------|--------------|
| 32 | 0.639929000  | 0.409452000  | -1.122104000 | 6  | -1.138659000 | 2.940405000  | 0.841578000  |
| 31 | -2.182365000 | -1.312200000 | -0.465926000 | 6  | -2.143821000 | 2.517774000  | -0.025317000 |
| 17 | -3.926560000 | -1.424886000 | 0.880709000  | 6  | -3.376617000 | 2.131720000  | 0.500880000  |
| 7  | 0.169954000  | 3.228850000  | 0.319275000  | 1  | -4.140673000 | 1.737901000  | -0.171451000 |
| 6  | 0.931312000  | 2.360772000  | -0.385757000 | 6  | -3.599537000 | 2.190145000  | 1.877996000  |
| 17 | -2.658977000 | -0.001996000 | -2.227459000 | 1  | -4.554281000 | 1.850078000  | 2.286756000  |
| 7  | 2.091900000  | 3.024681000  | -0.629603000 | 6  | -2.592975000 | 2.647879000  | 2.734480000  |
| 6  | 2.623754000  | 0.176060000  | -0.439377000 | 1  | -2.762308000 | 2.681127000  | 3.814401000  |
| 17 | -1.628828000 | -3.291683000 | -1.325939000 | 6  | -1.350030000 | 3.020179000  | 2.219599000  |
| 7  | 3.548084000  | 1.135730000  | -0.720564000 | 6  | 2.795704000  | -2.068435000 | 0.626617000  |
| 6  | 0.857273000  | 4.419132000  | 0.533951000  | 6  | 1.831741000  | -2.777824000 | -0.090196000 |
| 1  | 0.403665000  | 5.247364000  | 1.072452000  | 6  | 1.309279000  | -3.954648000 | 0.449981000  |
| 7  | 3.334063000  | -0.841729000 | 0.108959000  | 1  | 0.520833000  | -4.474985000 | -0.096615000 |
| 6  | 2.076805000  | 4.291582000  | -0.057952000 | 6  | 1.757631000  | -4.420956000 | 1.687530000  |
| 1  | 2.910632000  | 4.985184000  | -0.139853000 | 1  | 1.338693000  | -5.339280000 | 2.108439000  |
| 6  | 3.177065000  | 2.389570000  | -1.350456000 | 6  | 2.727099000  | -3.705221000 | 2.397905000  |
| 1  | 2.844248000  | 2.185324000  | -2.383752000 | 1  | 3.068437000  | -4.057223000 | 3.375540000  |
| 1  | 4.046803000  | 3.059062000  | -1.365504000 | 6  | 3.244382000  | -2.520513000 | 1.872869000  |
| 6  | 4.823888000  | 0.735765000  | -0.344757000 | 1  | 3.969246000  | -1.933331000 | 2.442777000  |
| 1  | 5.704104000  | 1.357263000  | -0.493053000 | 1  | 1.470621000  | -2.425027000 | -1.057400000 |
| 6  | 4.687075000  | -0.514188000 | 0.172656000  | 1  | -0.535261000 | 3.320441000  | 2.883959000  |
| 1  | 5.425115000  | -1.210006000 | 0.562142000  | 1  | -1.958904000 | 2.432584000  | -1.096762000 |
|    |              |              |              | 16 | -0.424212000 | -0.413317000 | 0.697799000  |

### INT (X=Se)

E = -8735.2467567

Free energy= -8734.988797

|    |              |              |              |    |              |              |              |
|----|--------------|--------------|--------------|----|--------------|--------------|--------------|
| 32 | 0.721448000  | 0.443385000  | -1.119838000 | 17 | -1.765255000 | -3.357214000 | -1.218143000 |
| 31 | -2.219048000 | -1.307590000 | -0.475656000 | 7  | 3.637598000  | 1.150027000  | -0.687115000 |
| 17 | -4.041627000 | -1.265068000 | 0.775327000  | 6  | 0.920300000  | 4.479078000  | 0.465056000  |
| 7  | 0.232281000  | 3.290487000  | 0.244740000  | 1  | 0.450755000  | 5.322214000  | 0.965254000  |
| 6  | 1.016841000  | 2.399524000  | -0.406889000 | 7  | 3.397522000  | -0.852612000 | 0.071550000  |
| 17 | -2.534443000 | -0.048375000 | -2.309291000 | 6  | 2.163065000  | 4.329625000  | -0.069630000 |
| 7  | 2.193126000  | 3.050409000  | -0.612135000 | 1  | 3.005770000  | 5.014729000  | -0.128826000 |
| 6  | 2.701448000  | 0.189623000  | -0.450460000 | 6  | 3.293845000  | 2.415076000  | -1.307304000 |

|   |              |              |              |    |              |              |              |
|---|--------------|--------------|--------------|----|--------------|--------------|--------------|
| 1 | 2.993113000  | 2.229690000  | -2.354203000 | 6  | 2.844563000  | -2.096147000 | 0.527828000  |
| 1 | 4.168490000  | 3.078107000  | -1.285652000 | 6  | 1.901720000  | -2.775653000 | -0.244258000 |
| 6 | 4.905086000  | 0.727085000  | -0.307605000 | 6  | 1.358563000  | -3.969019000 | 0.235454000  |
| 1 | 5.791930000  | 1.346181000  | -0.422550000 | 1  | 0.584266000  | -4.467277000 | -0.350034000 |
| 6 | 4.751375000  | -0.537975000 | 0.166127000  | 6  | 1.764396000  | -4.478935000 | 1.470427000  |
| 1 | 5.477846000  | -1.252472000 | 0.543407000  | 1  | 1.327263000  | -5.408382000 | 1.845799000  |
| 6 | -1.106961000 | 3.036424000  | 0.700400000  | 6  | 2.712270000  | -3.792659000 | 2.236731000  |
| 6 | -2.060942000 | 2.571631000  | -0.202479000 | 1  | 3.019260000  | -4.179881000 | 3.212400000  |
| 6 | -3.329216000 | 2.227906000  | 0.265622000  | 6  | 3.251722000  | -2.593209000 | 1.770481000  |
| 1 | -4.054786000 | 1.803623000  | -0.430197000 | 1  | 3.959528000  | -2.028906000 | 2.383246000  |
| 6 | -3.637705000 | 2.367589000  | 1.620174000  | 1  | 1.574732000  | -2.381457000 | -1.208229000 |
| 1 | -4.620202000 | 2.059102000  | 1.985761000  | 1  | -0.629508000 | 3.528337000  | 2.752545000  |
| 6 | -2.681013000 | 2.864866000  | 2.511129000  | 1  | -1.811683000 | 2.423853000  | -1.254064000 |
| 1 | -2.916865000 | 2.961230000  | 3.574669000  | 34 | -0.389068000 | -0.415962000 | 0.829392000  |
| 6 | -1.404123000 | 3.197506000  | 2.055535000  |    |              |              |              |

### TS2 (X=S)

E = -6731.9873278

Free Energy = -6731.726586

|    |              |              |              |    |              |              |              |
|----|--------------|--------------|--------------|----|--------------|--------------|--------------|
| 32 | 0.217797000  | 0.777172000  | 0.122292000  | 6  | -3.287381000 | 0.197490000  | 0.352843000  |
| 31 | -0.596838000 | -2.454285000 | -0.761203000 | 6  | -4.062118000 | -0.695226000 | 1.095709000  |
| 17 | -2.165316000 | -3.848137000 | -0.099479000 | 1  | -4.143082000 | -1.731813000 | 0.758416000  |
| 7  | -2.302591000 | 2.409344000  | 0.067862000  | 6  | -4.701377000 | -0.265467000 | 2.262093000  |
| 6  | -1.008030000 | 2.151604000  | -0.305826000 | 1  | -5.307866000 | -0.966625000 | 2.842462000  |
| 17 | -1.327467000 | -1.178217000 | -2.434440000 | 6  | -4.561267000 | 1.058701000  | 2.694086000  |
| 7  | -0.597828000 | 3.266308000  | -1.010191000 | 1  | -5.055778000 | 1.393996000  | 3.610324000  |
| 6  | 1.806375000  | 1.679527000  | -0.334604000 | 6  | -3.766815000 | 1.952081000  | 1.972656000  |
| 17 | 1.290626000  | -3.435933000 | -1.367404000 | 6  | 3.655298000  | 0.390561000  | 0.709976000  |
| 7  | 1.754897000  | 2.881841000  | -1.023974000 | 6  | 3.278315000  | -0.900988000 | 0.329424000  |
| 6  | -2.673115000 | 3.679118000  | -0.369945000 | 6  | 3.769844000  | -1.998143000 | 1.037586000  |
| 1  | -3.670104000 | 4.069339000  | -0.183343000 | 1  | 3.445305000  | -2.997533000 | 0.737092000  |
| 7  | 3.129782000  | 1.509941000  | 0.004591000  | 6  | 4.652372000  | -1.808038000 | 2.104395000  |
| 6  | -1.618795000 | 4.212548000  | -1.040385000 | 1  | 5.038543000  | -2.669309000 | 2.656907000  |
| 1  | -1.511586000 | 5.163360000  | -1.557017000 | 6  | 5.038761000  | -0.512979000 | 2.469915000  |
| 6  | 0.602089000  | 3.232678000  | -1.813983000 | 1  | 5.722892000  | -0.359335000 | 3.309487000  |
| 1  | 0.466697000  | 2.455125000  | -2.601449000 | 6  | 4.534736000  | 0.592265000  | 1.782056000  |
| 1  | 0.759883000  | 4.219195000  | -2.270762000 | 1  | 4.802764000  | 1.607317000  | 2.087000000  |
| 6  | 3.024290000  | 3.454353000  | -1.074563000 | 1  | 2.612502000  | -1.067775000 | -0.518614000 |
| 1  | 3.212892000  | 4.397465000  | -1.582002000 | 1  | -3.617845000 | 2.977168000  | 2.322541000  |
| 6  | 3.870518000  | 2.606343000  | -0.437190000 | 1  | -2.808236000 | -0.124161000 | -0.574656000 |
| 1  | 4.944338000  | 2.660110000  | -0.279806000 | 16 | -0.145381000 | -1.103436000 | 1.097028000  |
| 6  | -3.134681000 | 1.511677000  | 0.803991000  |    |              |              |              |

### TS2 (X=Se)

E = -8735.2066002

Free energy = -8734.947858

|    |              |              |              |    |              |              |              |
|----|--------------|--------------|--------------|----|--------------|--------------|--------------|
| 32 | -0.254042000 | 0.876271000  | 0.128761000  | 6  | 0.942190000  | 2.277909000  | -0.310650000 |
| 31 | 0.648299000  | -2.392663000 | -0.885313000 | 17 | 1.310202000  | -1.021950000 | -2.512924000 |
| 17 | 2.266985000  | -3.781785000 | -0.332508000 | 7  | 0.510893000  | 3.389861000  | -1.005951000 |
| 7  | -3.181726000 | 1.532584000  | -0.032942000 | 6  | -3.951179000 | 2.605027000  | -0.484644000 |
| 6  | -1.858754000 | 1.748573000  | -0.343301000 | 1  | -5.028900000 | 2.621677000  | -0.346708000 |
| 17 | -1.228527000 | -3.388743000 | -1.509557000 | 7  | 2.240322000  | 2.546018000  | 0.040090000  |
| 7  | -1.833859000 | 2.956755000  | -1.023259000 | 6  | -3.121526000 | 3.484480000  | -1.100414000 |

|   |              |              |              |    |              |              |              |
|---|--------------|--------------|--------------|----|--------------|--------------|--------------|
| 1 | -3.331289000 | 4.424407000  | -1.605483000 | 6  | -4.585587000 | 0.531486000  | 1.699596000  |
| 6 | -0.689007000 | 3.342395000  | -1.809237000 | 6  | 3.101205000  | 1.644844000  | 0.739868000  |
| 1 | -0.538896000 | 2.582406000  | -2.610906000 | 6  | 3.289058000  | 0.354032000  | 0.237638000  |
| 1 | -0.868076000 | 4.332662000  | -2.249859000 | 6  | 4.095888000  | -0.542712000 | 0.940603000  |
| 6 | 1.525150000  | 4.342871000  | -1.056913000 | 1  | 4.205674000  | -1.563090000 | 0.563898000  |
| 1 | 1.400776000  | 5.293400000  | -1.570234000 | 6  | 4.728169000  | -0.139471000 | 2.120062000  |
| 6 | 2.594761000  | 3.818021000  | -0.404424000 | 1  | 5.358857000  | -0.843948000 | 2.669850000  |
| 1 | 3.591373000  | 4.215949000  | -0.232575000 | 6  | 4.549748000  | 1.161640000  | 2.605068000  |
| 6 | -3.689341000 | 0.380470000  | 0.633411000  | 1  | 5.038697000  | 1.475336000  | 3.531863000  |
| 6 | -3.282511000 | -0.890900000 | 0.217065000  | 6  | 3.725547000  | 2.058360000  | 1.922032000  |
| 6 | -3.764194000 | -2.019270000 | 0.881885000  | 1  | 3.548530000  | 3.064877000  | 2.310645000  |
| 1 | -3.417112000 | -3.002435000 | 0.554293000  | 1  | 2.807799000  | 0.051931000  | -0.695482000 |
| 6 | -4.663935000 | -1.879609000 | 1.941973000  | 1  | -4.876914000 | 1.531521000  | 2.031646000  |
| 1 | -5.041906000 | -2.765312000 | 2.460513000  | 1  | -2.599980000 | -1.017431000 | -0.624914000 |
| 6 | -5.077956000 | -0.604302000 | 2.344884000  | 34 | 0.184589000  | -1.103735000 | 1.161775000  |
| 1 | -5.775562000 | -0.490520000 | 3.179690000  |    |              |              |              |

### Compound E

E = -9133.386066

Free energy = -9133.126398

|    |              |              |             |    |              |              |              |
|----|--------------|--------------|-------------|----|--------------|--------------|--------------|
| 32 | -1.203175000 | 0.127817000  | 0.000000000 | 1  | 0.186423000  | -2.760845000 | 4.720499000  |
| 31 | 2.329272000  | -0.621668000 | 0.000000000 | 17 | 2.534834000  | 0.774842000  | -1.765211000 |
| 17 | 2.534834000  | 0.774842000  | 1.765211000 | 6  | -0.556959000 | 1.409957000  | -1.417174000 |
| 6  | -0.556959000 | 1.409957000  | 1.417174000 | 6  | -0.298959000 | 2.423932000  | -3.399213000 |
| 17 | 3.946941000  | -2.093732000 | 0.000000000 | 1  | -0.340191000 | 2.510182000  | -4.481595000 |
| 6  | -0.298959000 | 2.423932000  | 3.399213000 | 6  | 0.123558000  | 3.292504000  | -2.439039000 |
| 1  | -0.340191000 | 2.510182000  | 4.481595000 | 1  | 0.546204000  | 4.291362000  | -2.514165000 |
| 6  | 0.123558000  | 3.292504000  | 2.439039000 | 6  | -1.149722000 | 0.056548000  | -3.377643000 |
| 1  | 0.546204000  | 4.291362000  | 2.514165000 | 6  | -0.168436000 | -0.841822000 | -3.802823000 |
| 6  | 0.583294000  | 3.117209000  | 0.000000000 | 6  | -1.930136000 | -2.333158000 | -4.533803000 |
| 1  | 0.568897000  | 4.216411000  | 0.000000000 | 1  | -2.239599000 | -3.280509000 | -4.984774000 |
| 1  | 1.625105000  | 2.749009000  | 0.000000000 | 7  | -0.062763000 | 2.654913000  | -1.217860000 |
| 6  | -1.149722000 | 0.056548000  | 3.377643000 | 6  | -2.897553000 | -1.429023000 | -4.084600000 |
| 6  | -0.168436000 | -0.841822000 | 3.802823000 | 1  | -3.960406000 | -1.668914000 | -4.173407000 |
| 6  | -1.930136000 | -2.333158000 | 4.533803000 | 6  | -2.511320000 | -0.221834000 | -3.497247000 |
| 1  | -2.239599000 | -3.280509000 | 4.984774000 | 7  | -0.723446000 | 1.279956000  | -2.744247000 |
| 7  | -0.062763000 | 2.654913000  | 1.217860000 | 6  | -0.569154000 | -2.042520000 | -4.391444000 |
| 6  | -2.897553000 | -1.429023000 | 4.084600000 | 1  | 0.186423000  | -2.760845000 | -4.720499000 |
| 1  | -3.960406000 | -1.668914000 | 4.173407000 | 1  | -3.247999000 | 0.476152000  | -3.097518000 |
| 6  | -2.511320000 | -0.221834000 | 3.497247000 | 1  | 0.885168000  | -0.605684000 | -3.638072000 |
| 7  | -0.723446000 | 1.279956000  | 2.744247000 | 1  | -3.247999000 | 0.476152000  | 3.097518000  |
| 34 | 0.205031000  | -1.746991000 | 0.000000000 | 1  | 0.885168000  | -0.605684000 | 3.638072000  |
| 6  | -0.569154000 | -2.042520000 | 4.391444000 | 16 | -3.300067000 | 0.085794000  | 0.000000000  |

### Compound F

E = -9133.3889204

Free energy = -9133.127578

|    |              |              |             |    |              |              |             |
|----|--------------|--------------|-------------|----|--------------|--------------|-------------|
| 34 | -3.086464000 | -0.119711000 | 0.000000000 | 17 | 4.128863000  | -2.286369000 | 0.000000000 |
| 32 | -0.863844000 | -0.016619000 | 0.000000000 | 6  | -0.166187000 | 2.381820000  | 3.377580000 |
| 31 | 2.561424000  | -0.766035000 | 0.000000000 | 1  | -0.277866000 | 2.503820000  | 4.451570000 |
| 17 | 2.781463000  | 0.608595000  | 1.775243000 | 6  | 0.305960000  | 3.223911000  | 2.416473000 |
| 6  | -0.268568000 | 1.290969000  | 1.420799000 | 1  | 0.703337000  | 4.233763000  | 2.482768000 |

|    |              |              |              |
|----|--------------|--------------|--------------|
| 6  | 0.893592000  | 2.969606000  | 0.000000000  |
| 1  | 0.932471000  | 4.067592000  | 0.000000000  |
| 1  | 1.916298000  | 2.552184000  | 0.000000000  |
| 6  | -1.011177000 | 0.012029000  | 3.378465000  |
| 6  | -0.133238000 | -1.060255000 | 3.546013000  |
| 6  | -1.948404000 | -2.319264000 | 4.538995000  |
| 1  | -2.321377000 | -3.243149000 | 4.990479000  |
| 7  | 0.216363000  | 2.538339000  | 1.211357000  |
| 6  | -2.814391000 | -1.235103000 | 4.359418000  |
| 1  | -3.862937000 | -1.311948000 | 4.659185000  |
| 6  | -2.349496000 | -0.059834000 | 3.767441000  |
| 7  | -0.521316000 | 1.205194000  | 2.738414000  |
| 6  | -0.613984000 | -2.233872000 | 4.131058000  |
| 1  | 0.058671000  | -3.086170000 | 4.257714000  |
| 17 | 2.781463000  | 0.608595000  | -1.775243000 |
| 6  | -0.268568000 | 1.290969000  | -1.420799000 |
| 6  | -0.166187000 | 2.381820000  | -3.377580000 |
| 1  | -0.277866000 | 2.503820000  | -4.451570000 |
| 6  | 0.305960000  | 3.223911000  | -2.416473000 |
| 1  | 0.703337000  | 4.233763000  | -2.482768000 |
| 6  | -1.011177000 | 0.012029000  | -3.378465000 |
| 6  | -0.133238000 | -1.060255000 | -3.546013000 |
| 6  | -1.948404000 | -2.319264000 | -4.538995000 |
| 1  | -2.321377000 | -3.243149000 | -4.990479000 |
| 7  | 0.216363000  | 2.538339000  | -1.211357000 |
| 6  | -2.814391000 | -1.235103000 | -4.359418000 |
| 1  | -3.862937000 | -1.311948000 | -4.659185000 |
| 6  | -2.349496000 | -0.059834000 | -3.767441000 |
| 7  | -0.521316000 | 1.205194000  | -2.738414000 |
| 6  | -0.613984000 | -2.233872000 | -4.131058000 |
| 1  | 0.058671000  | -3.086170000 | -4.257714000 |
| 1  | -3.019052000 | 0.780770000  | -3.575574000 |
| 1  | 0.900515000  | -0.968865000 | -3.207381000 |
| 1  | -3.019052000 | 0.780770000  | 3.575574000  |
| 1  | 0.900515000  | -0.968865000 | 3.207381000  |
| 16 | 0.506783000  | -1.758942000 | 0.000000000  |

S<sub>8</sub>

E = -3184.7327859

Free energy = -3184.759692

|    |              |              |              |
|----|--------------|--------------|--------------|
| 16 | -2.208780000 | 0.914878000  | -0.508956000 |
| 16 | 0.914873000  | 2.208815000  | -0.508954000 |
| 16 | 2.208780000  | -0.914878000 | -0.508956000 |
| 16 | -0.914873000 | -2.208815000 | -0.508954000 |
| 16 | -0.914873000 | 2.208626000  | 0.508964000  |
| 16 | 2.208603000  | 0.914875000  | 0.508946000  |
| 16 | -2.208603000 | -0.914875000 | 0.508946000  |
| 16 | 0.914873000  | -2.208626000 | 0.508964000  |

Se<sub>8</sub>

E = -19210.5504065

Free energy = -19210.59163

|    |              |              |              |
|----|--------------|--------------|--------------|
| 34 | 0.000107000  | 2.672478000  | 0.587731000  |
| 34 | -2.672172000 | 0.000094000  | 0.587963000  |
| 34 | -0.000107000 | -2.672478000 | 0.587731000  |
| 34 | 2.672172000  | -0.000094000 | 0.587963000  |
| 34 | -1.889116000 | 1.889212000  | -0.587784000 |
| 34 | -1.889116000 | -1.889002000 | -0.587909000 |
| 34 | 1.889116000  | 1.889002000  | -0.587909000 |
| 34 | 1.889116000  | -1.889212000 | -0.587784000 |

## D. References

1. Y. Xiong, S. Yao, G. Tan, S. Inoue, and M. Driess, *J. Am. Chem. Soc.* 2013, **135**, 5004.
2. G. M. Sheldrick, *SHELX-97 Program for Crystal Structure Determination*, Universität Göttingen (Germany) **1997**.
3. Gaussian 09, Revision D.01, M. J. Frisch, G. W. Trucks, H. B. Schlegel, G. E. Scuseria, M. A. Robb, J. R. Cheeseman, G. Scalmani, V. Barone, B. Mennucci, G. A. Petersson, H. Nakatsuji, M. Caricato, X. Li, H. P. Hratchian, A. F. Izmaylov, J. Bloino, G. Zheng, J. L. Sonnenberg, M. Hada, M. Ehara, K. Toyota, R. Fukuda, J. Hasegawa, M. Ishida, T. Nakajima, Y. Honda, O. Kitao, H. Nakai, T. Vreven, J. A. Montgomery, Jr., J. E. Peralta, F. Ogliaro, M. Bearpark, J. J. Heyd, E. Brothers, K. N. Kudin, V. N. Staroverov, T. Keith, R. Kobayashi, J. Normand, K. Raghavachari, A. Rendell, J. C. Burant, S. S. Iyengar, J. Tomasi, M. Cossi, N. Rega, J. M. Millam, M. Klene, J. E. Knox, J. B. Cross, V. Bakken, C. Adamo, J. Jaramillo, R. Gomperts, R. E. Stratmann, O. Yazyev, A. J. Austin, R. Cammi, C. Pomelli, J. W. Ochterski, R. L. Martin, K. Morokuma, V. G. Zakrzewski, G. A. Voth, P. Salvador, J. J. Dannenberg, S. Dapprich, A. D. Daniels, O. Farkas, J. B. Foresman, J. V. Ortiz, J. Cioslowski, and D. J. Fox, Gaussian, Inc., Wallingford CT, 2013.
4. F. Neese, *ORCA, version 3.0.2, An ab initio, density functional and semiempirical program package*, Max Planck Institute for Bioinorganic Chemistry, Mülheim a.d. Ruhr, Germany, **2012**.
5. (a) A. D. Becke, *Phys. Rev. A* 1988, **38**, 3098; (b) C. T. Lee, W. T. Yang, R. G. Parr, *Phys. Rev. B* 1988, **37**, 785; (c) A. D. Becke, *J. Phys. Chem.* 1993, **98**, 5648.
6. (a) A. Schaefer, C. Huber, and R. Ahlrichs, *J. Chem. Phys.*, 1994, **100** 5829; (b) F. Weigend, *Phys. Chem. Chem. Phys.*, 2006, **8**, 1057.
7. 0th order regular approximation. E. van Lenthe, E. J. Baerends, and J. G. Snijders, *J. Chem. Phys.* 1993, **99** 4597.
8. J. P. Perdew, *Phys. Rev. B*, 1986, **33**, 8822.
9. S. Grimme, J. Antony, S. Ehrlich, H. Krieg, *J. Chem. Phys.*, 2010, **132**, 154104.
10. S. Grimme, S. Ehrlich and L. Goerigk, *J. Comp. Chem.* 2011, **32** 1456.
11. J. Tomasi, B. Mennucci, and R. Cammi, *Chem. Rev.*, 2005, **105** 2999.
12. NBO 6.0. E. D. Glendening, J. K. Badenhoop, A. E. Reed, J. E. Carpenter, J. A. Bohmann, C. M. Morales, C. R. Landis, and F. Weinhold, Theoretical Chemistry Institute, University of Wisconsin, Madison (2013).

- 13 A. E. Reed, R. B. Weinstock, and F. Weinhold, *J. Chem. Phys.* 1985, **83**, 735.
- 14 K. B. Wiberg, *Tetrahedron*, 1968, **24**, 1083.
- 15 (a) E. D. Glendening and F. Weinhold, *J. Comp. Chem.* 1998, **19**, 593; (b) E. D. Glendening and F. Weinhold, *J. Comp. Chem.* 1998, **19**, 610; (c) E. D. Glendening, J. K. Badenhop, and F. Weinhold, *J. Comp. Chem.* 1998, **19**, 628.
- 16 W. Kutzelnigg, U. Fleischer, M. Schindler. *The IGLO-Method: Ab Initio Calculation and Interpretation of NMR Chemical Shifts and Magnetic Susceptibilities*, volume 23. Springer Verlag, 1990.
- 17 (a) C. J. Jameson, in *Specialist Periodic Reports on NMR*, edited by G. A. Webb (Royal Society of Chemistry, London, 1994), Vol. 24. P. 1. (b) G. Schreckenbach, Y. Ruiz-Morales, T. Ziegler, *J. Chem. Phys.* 1996, **104**, 8605; (c) W. Gombler, *Phosphorus and Sulfur*, 1988, Vol. **38**, pp. 231-243; (d) E. R. Cullen, F. S. Guziec, Jr., C. J. Murphy, T. C. Wong, K. K. Andersen, *J. Am. Chem. Soc.* 1981, **103**, 7055; (e) W. Nakanishi, S. Hayashi, *J. Phys. Chem. A* 1999, **103**, 6074; (f) J. Peralta-Cruz, V. I. Bakhmutov, A. Ariza-Castolo, *Magn. Reson. Chem.* 2001, **39**, 187; (g) Y. Yu. Rusakov, L. B. Krivdin, *J. Comput. Chem.* 2015, **36**, 1756; (h) T. W. Keal, D. J. Tozer, *Molecular Physics*, 2005, **103**, 1007; (i) B. Wrackmeyer, Z. G. Hernandez, M. Herberhold, *Magn. Reson. Chem.* 2007, **45**, 198; (j) W. McFarlane, D.S. Rycroft, *J. Chem. Soc. Chem. Comm.*, 1972, 902.
- 18 (a) R. Boese, A. Hass, C. Limberg, *J. Chem. Soc., Chem. Commun.* **1991**, 1378; (b) Y. Ruiz-Morales, G. Schreckenbach, T. Ziegler, *J. Phys. Chem. A* 1997, **101**, 4121.
